# Supplementary material for: Diastereoselective ZnCl2-Mediated Joullié–Ugi Three-Component Reaction for the Preparation of Phosphorylated N-Acylaziridines from 2H-Azirines
Source: MDPI journal article supplement (doi:10.3390/molecules29051023), 2024-02-27
Supplement: s1 [file s1]

## Supplementary Materials

# Diastereoselective ZnCl<sub>2</sub>-Mediated Joullié-Ugi Three-Component Reaction for the Preparation of Phosphorylated *N*-Acylaziridines from 2*H*-Azirines

Julene Allende, Iurre Olaizola, Ana M. Ochoa de Retana, Francisco Palacios and Jesús M. de los Santos \*

Department of Organic Chemistry I, Faculty of Pharmacy, Lascaray Research Center, University of the Basque Country (UPV/EHU), Paseo de la Universidad 7, 01006 Vitoria, Spain

\* Correspondence: [jesus.delossantos@ehu.eus](mailto:jesus.delossantos@ehu.eus); Tel.: +34-945-013-104

---

### Table of contents

|                                                                                                                                                                   |     |
|-------------------------------------------------------------------------------------------------------------------------------------------------------------------|-----|
| 1. <sup>1</sup> H NMR, <sup>13</sup> C NMR, <sup>31</sup> P NMR, <sup>19</sup> F NMR and 2D HMBC NMR { <sup>1</sup> H- <sup>13</sup> C} spectra of compounds..... | S2  |
| 2. ORTEP view and X-ray crystallographic statistics for compound <b>4i</b> and <b>7a</b> .....                                                                    | S76 |
| 3. References .....                                                                                                                                               | S80 |

# 1. $^1\text{H}$ NMR, $^{13}\text{C}$ NMR, $^{31}\text{P}$ NMR, $^{19}\text{F}$ NMR and 2D HMBC NMR $\{^1\text{H}-^{13}\text{C}\}$ spectra of compounds

$^1\text{H}$  NMR (400 MHz,  $\text{CDCl}_3$ ) of *N*-Acylaziridine Phosphine Oxide **4a**

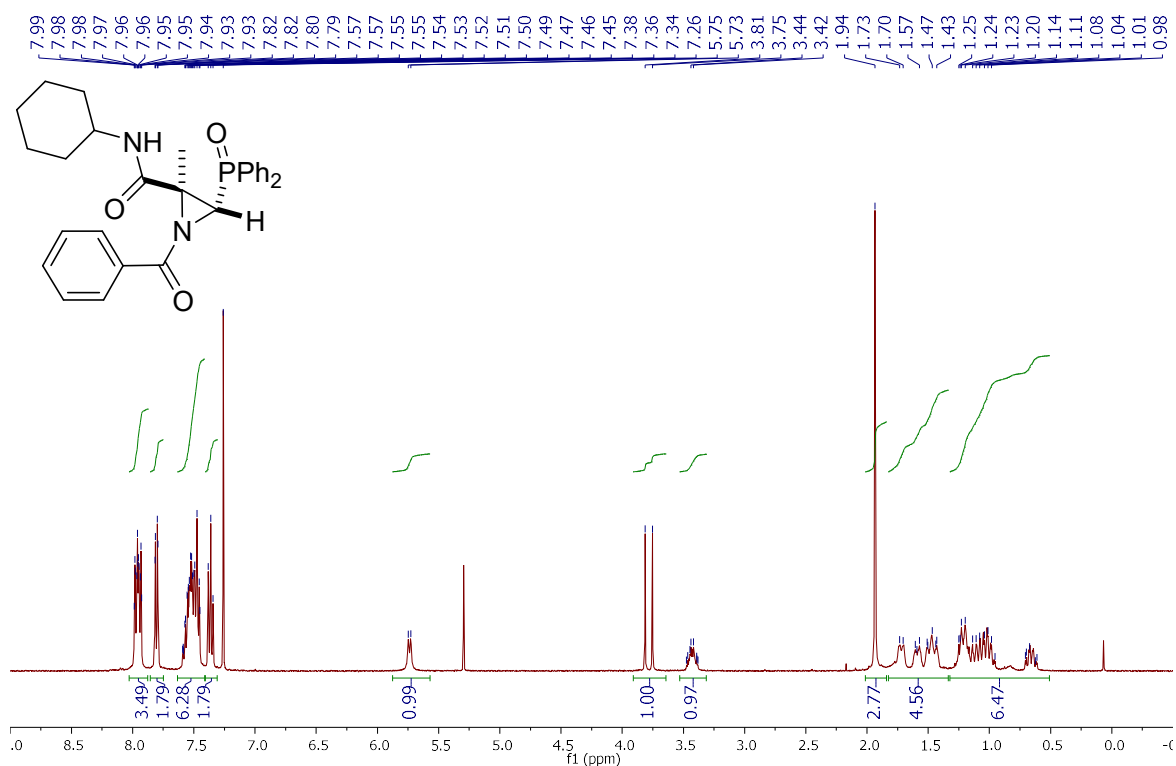

$^{13}\text{C}$   $\{^1\text{H}\}$  NMR (100 MHz,  $\text{CDCl}_3$ ) of *N*-Acylaziridine Phosphine Oxide **4a**

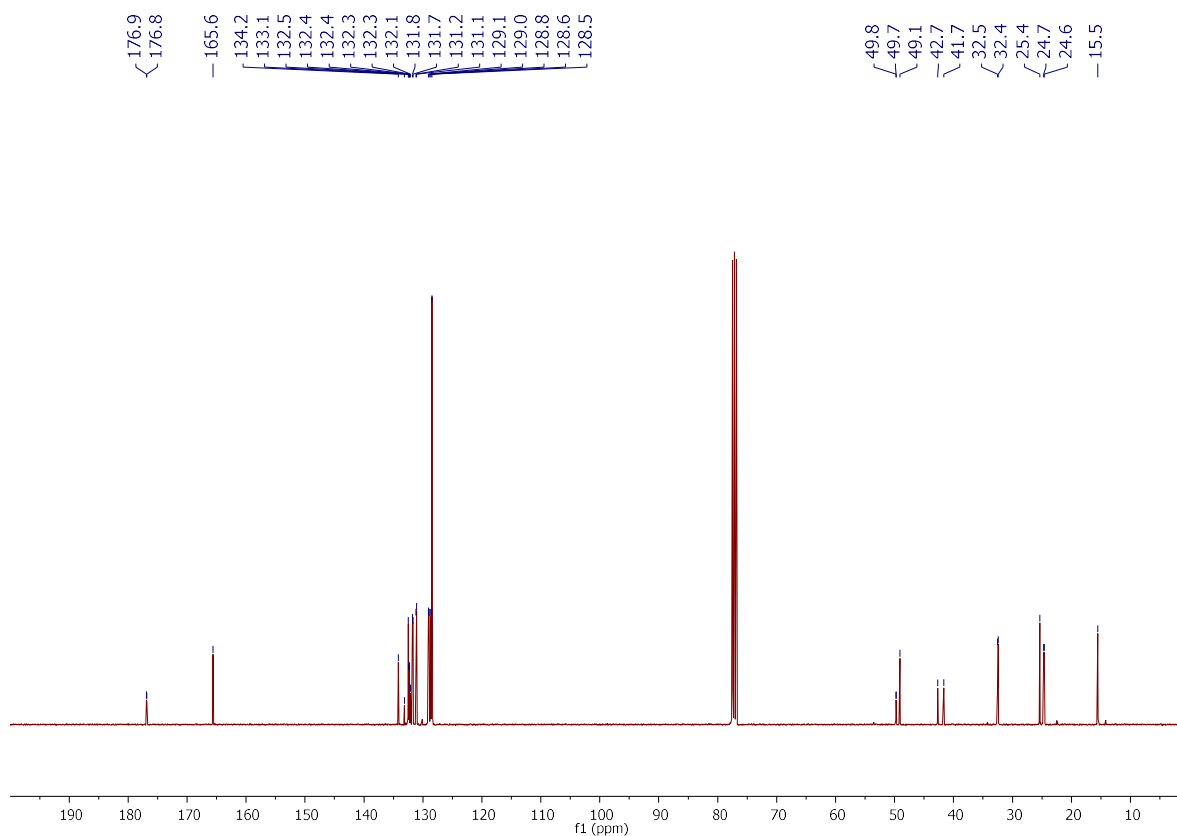

$^{31}\text{P}$  (160 MHz,  $\text{CDCl}_3$ ) of *N*-Acylaziridine Phosphine Oxide **4a**

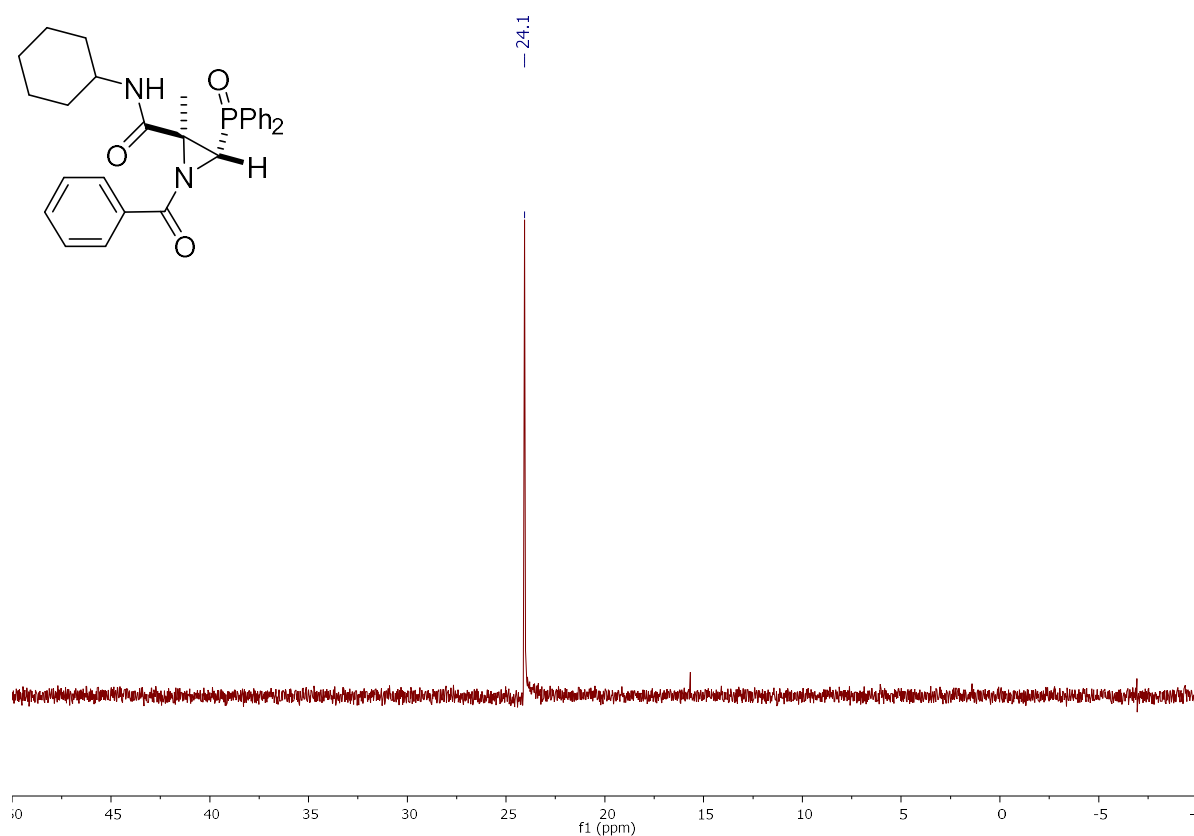

$^1\text{H}$ - $^{13}\text{C}$  HMBC ( $\text{CDCl}_3$ ) of *N*-Acylaziridine Phosphine Oxide **4a**

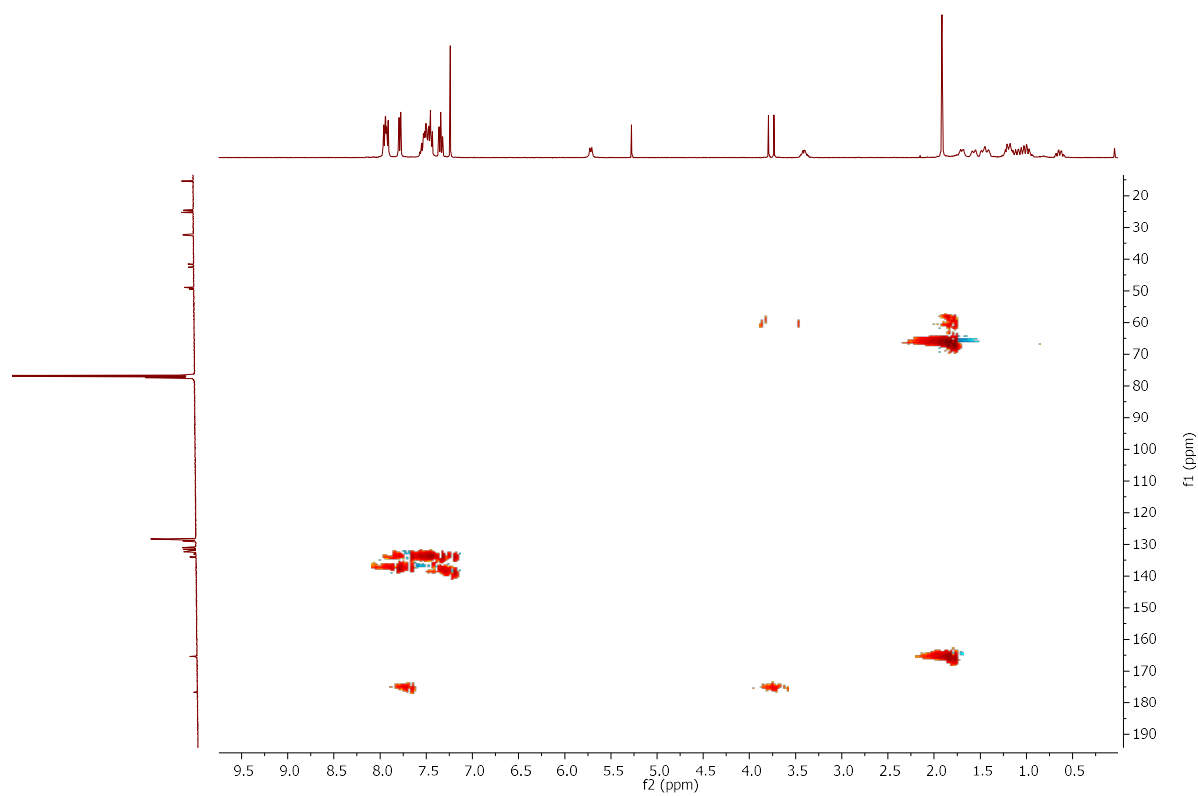

$^1\text{H}$  NMR (400 MHz,  $\text{CDCl}_3$ ) of *N*-Acylaziridine Phosphine Oxide **4b**

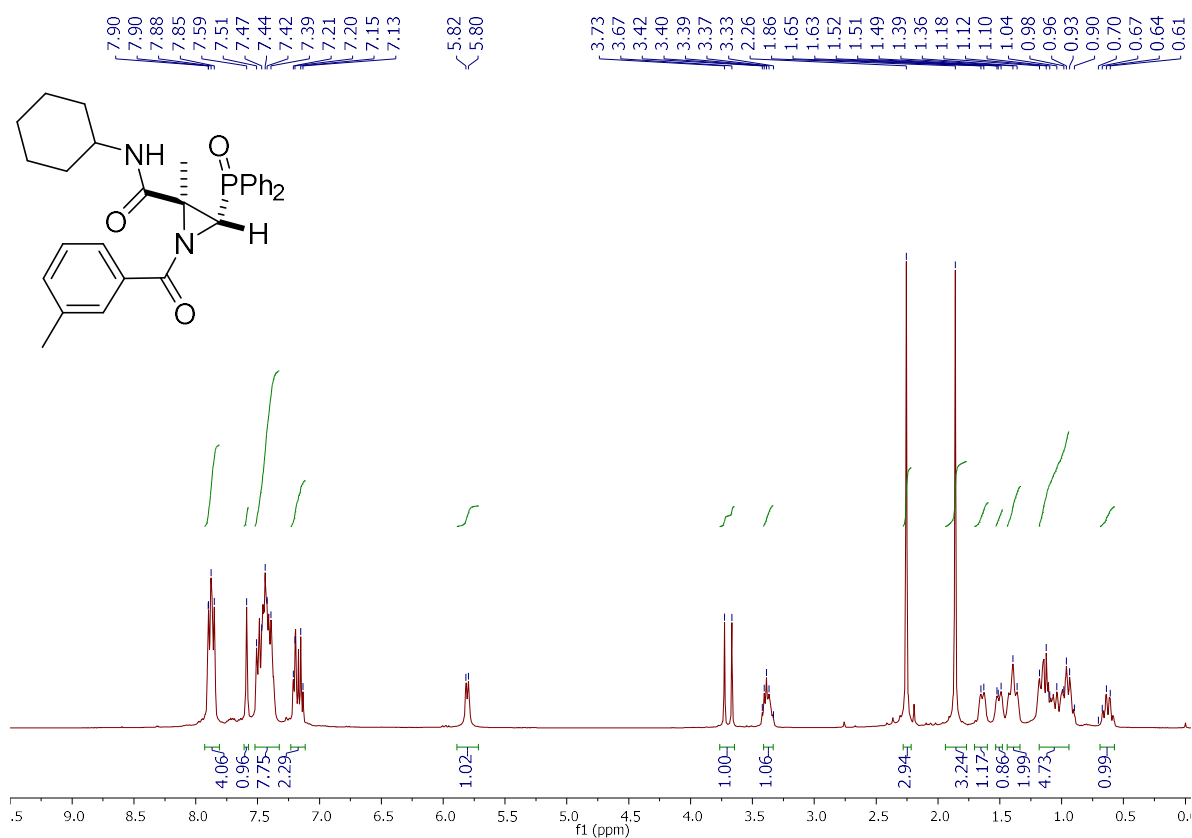

$^{13}\text{C}$  { $^1\text{H}$ } NMR (100 MHz,  $\text{CDCl}_3$ ) of *N*-Acylaziridine Phosphine Oxide **4b**

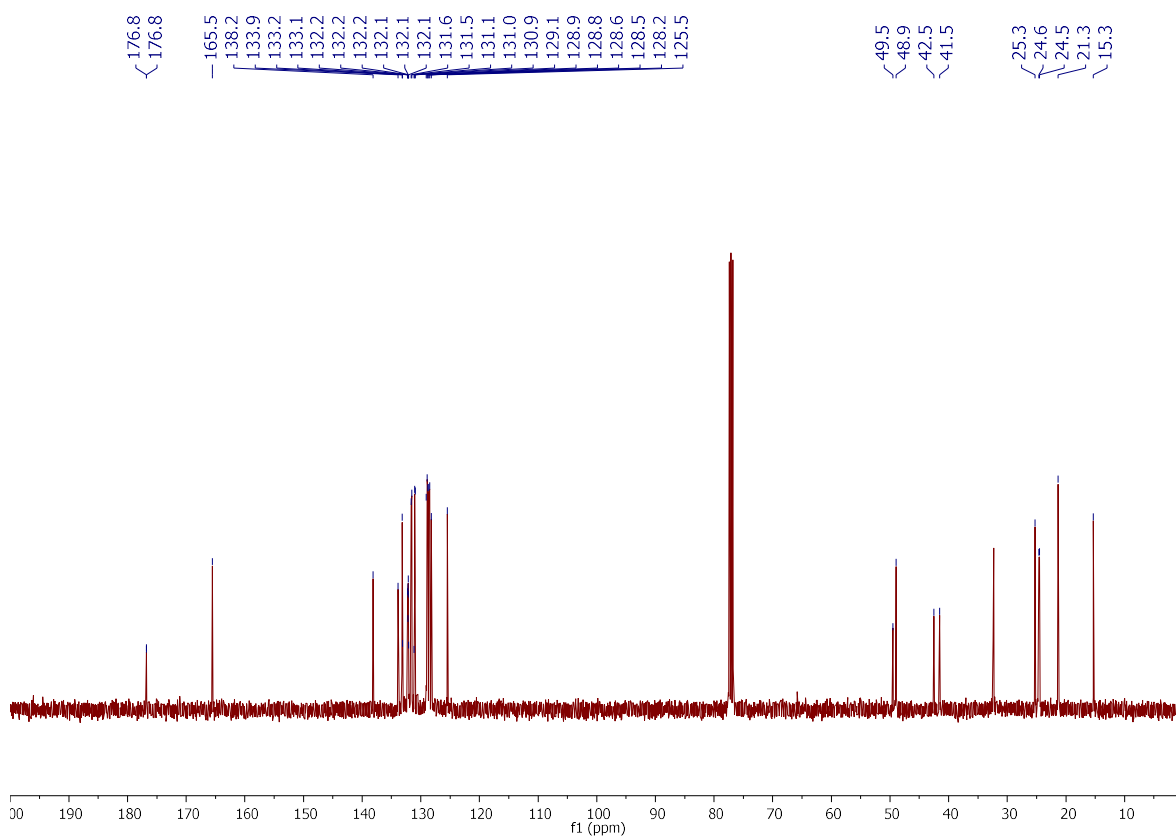

$^{31}\text{P}$  (160 MHz,  $\text{CDCl}_3$ ) of *N*-Acylaziridine Phosphine Oxide **4b**

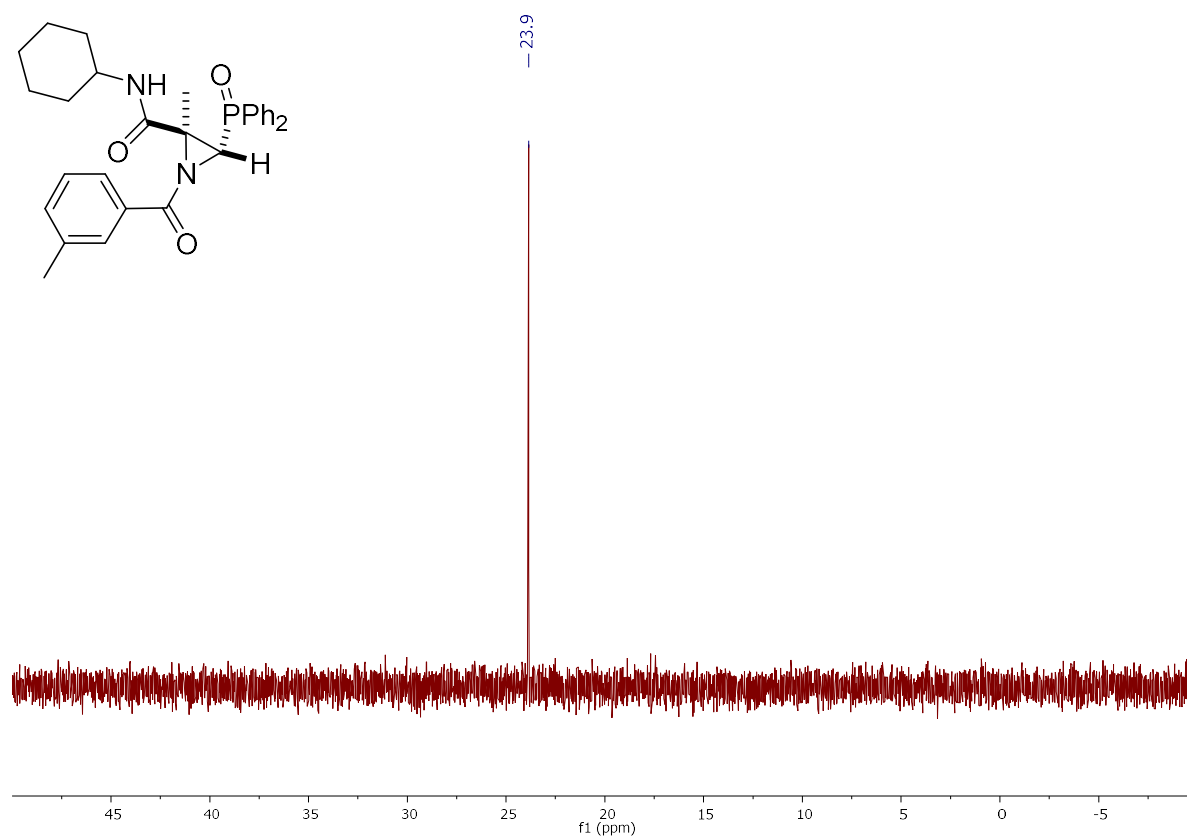

$^1\text{H}$  NMR (400 MHz,  $\text{CDCl}_3$ ) of *N*-Acylaziridine Phosphine Oxide **4c**

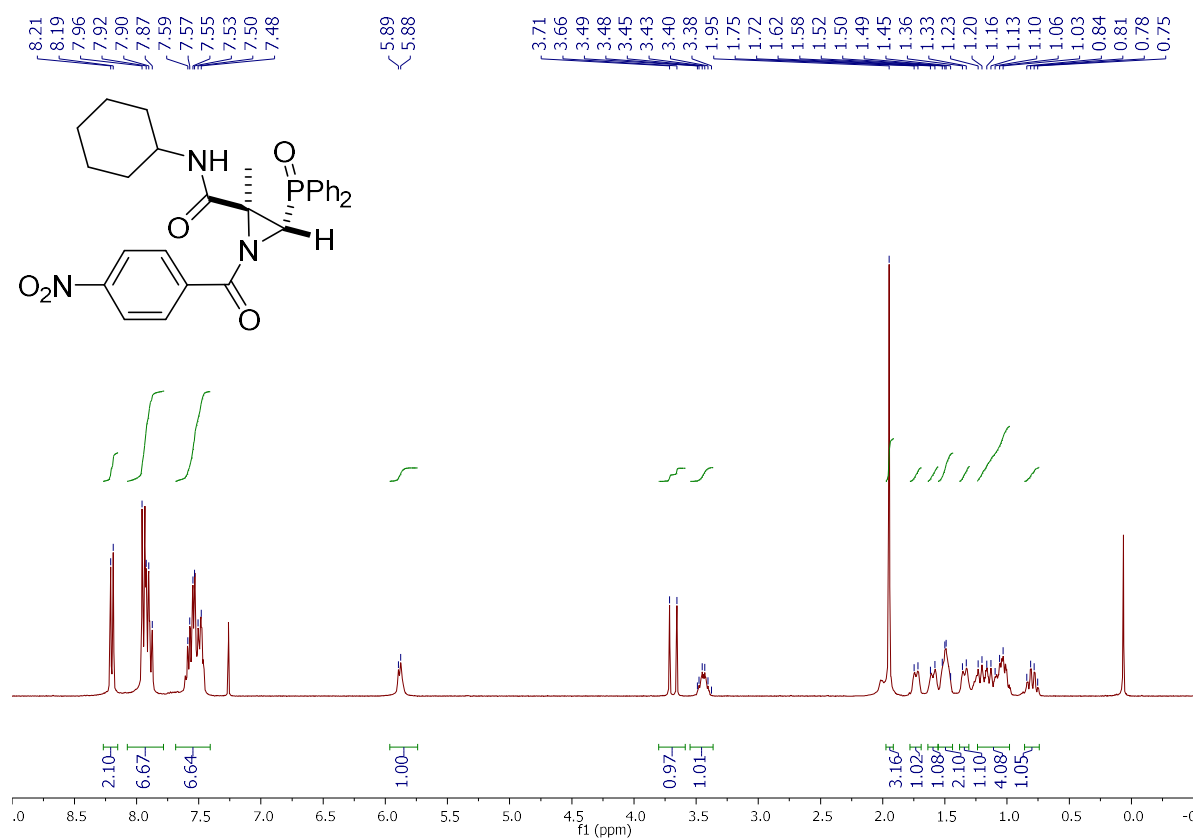

$^{13}\text{C}$  { $^1\text{H}$ } NMR (100 MHz,  $\text{CDCl}_3$ ) of *N*-Acylaziridine Phosphine Oxide **4c**

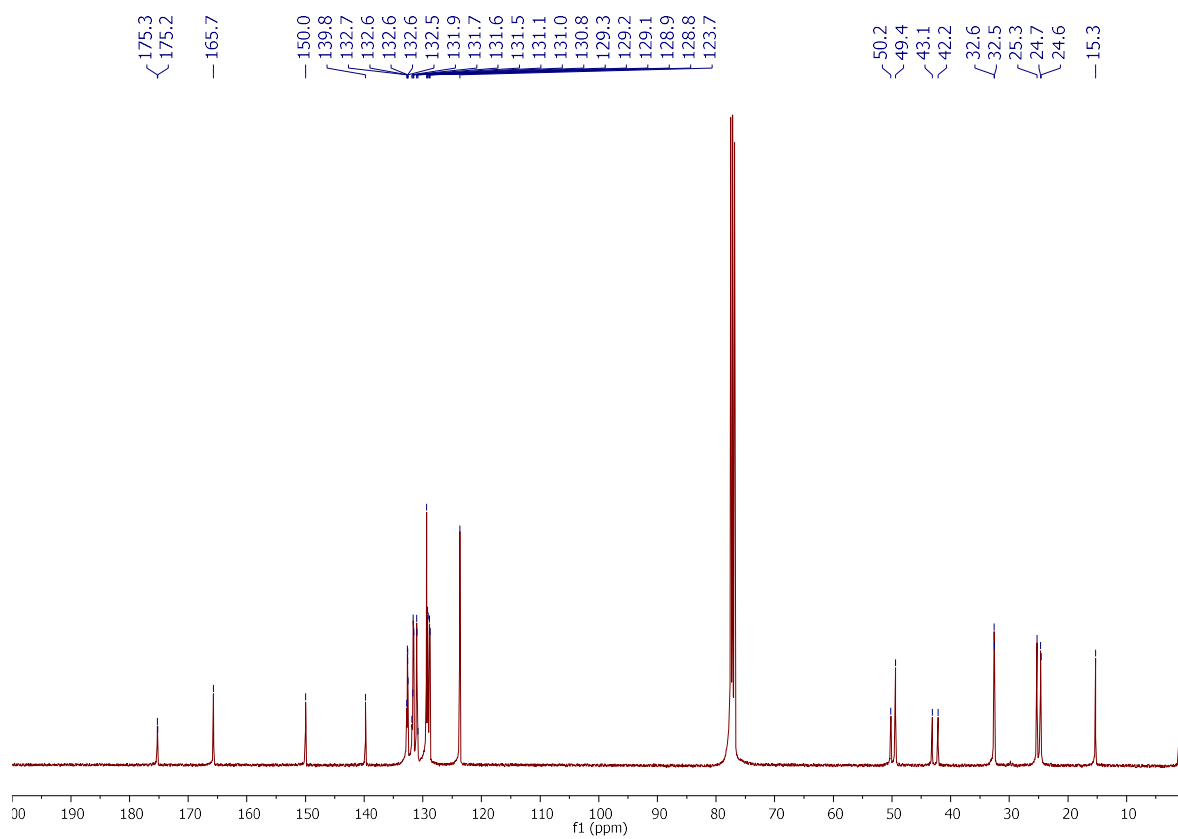

$^{31}\text{P}$  (160 MHz,  $\text{CDCl}_3$ ) of *N*-Acylaziridine Phosphine Oxide **4c**

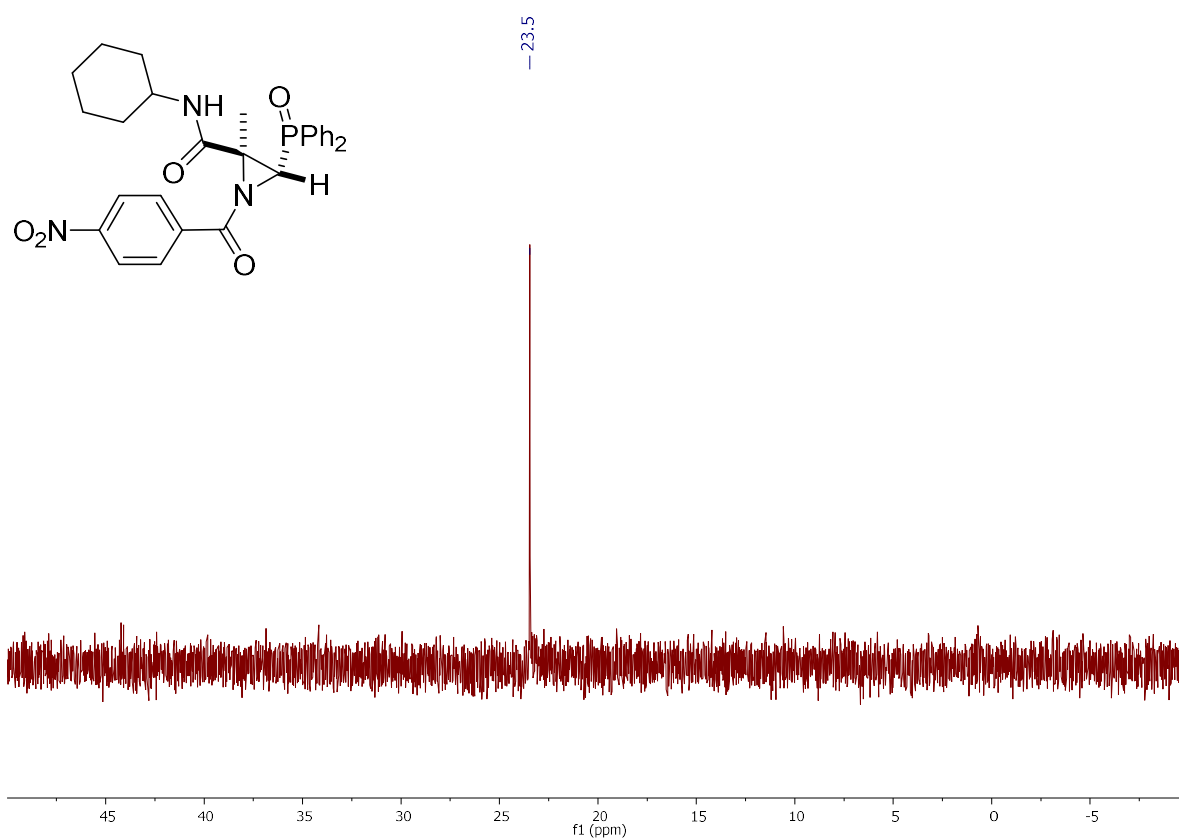

$^1\text{H}$  NMR (400 MHz,  $\text{CDCl}_3$ ) of *N*-Acylaziridine Phosphine Oxide **4d**

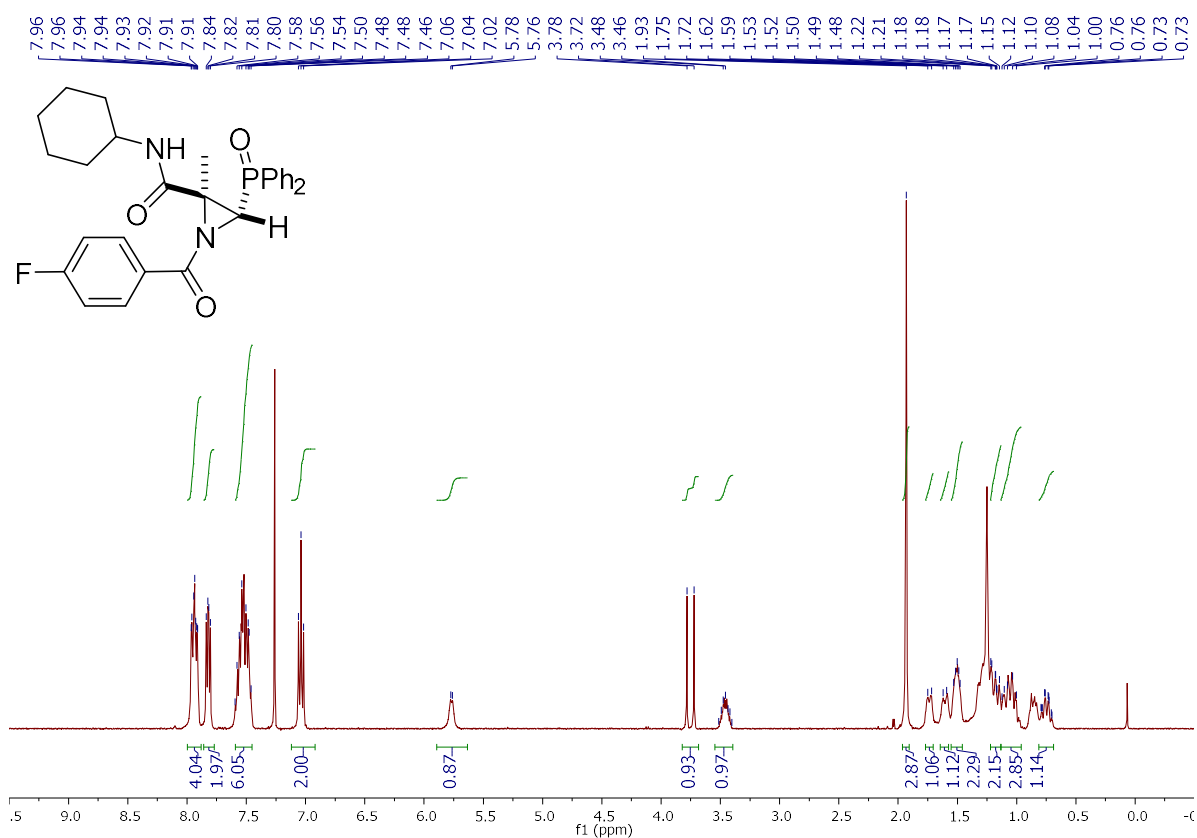

$^{13}\text{C}$  { $^1\text{H}$ } NMR (100 MHz,  $\text{CDCl}_3$ ) of *N*-Acylaziridine Phosphine Oxide **4d**

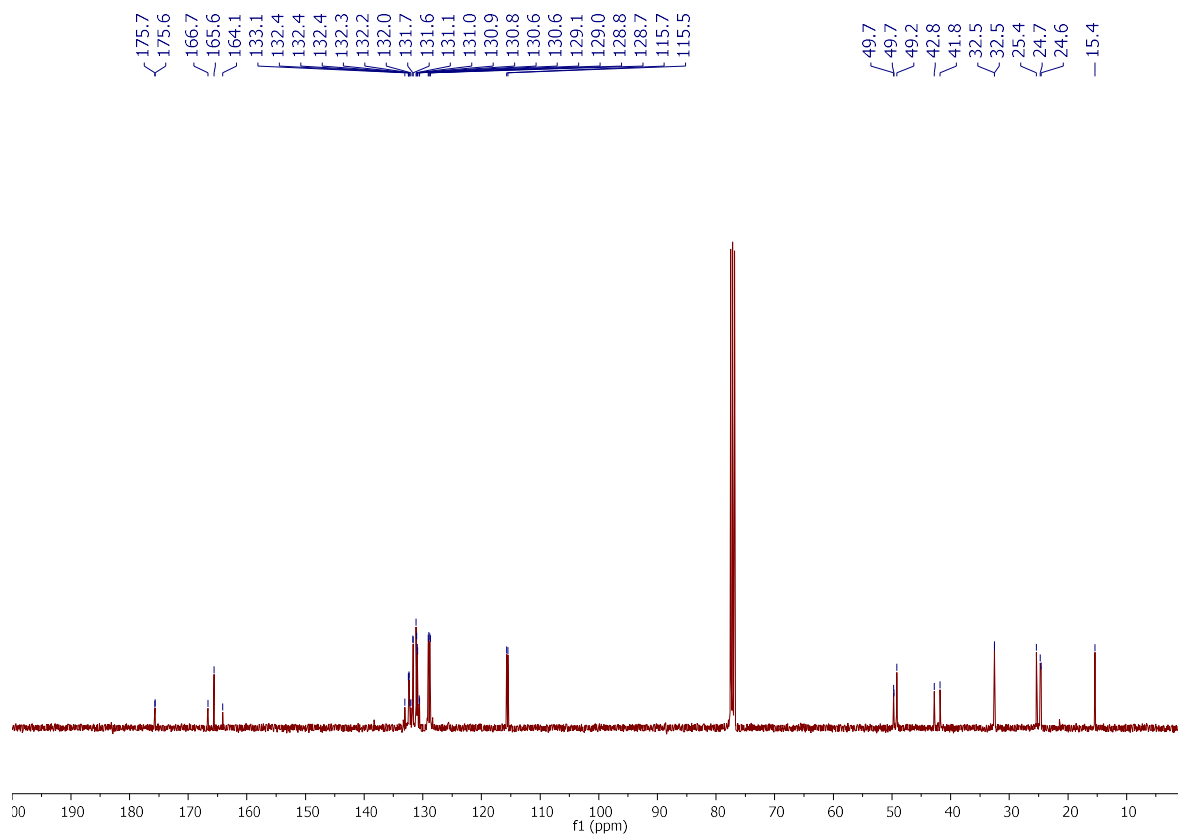



$^{31}\text{P}$  (160 MHz,  $\text{CDCl}_3$ ) of *N*-Acylaziridine Phosphine Oxide **4d**

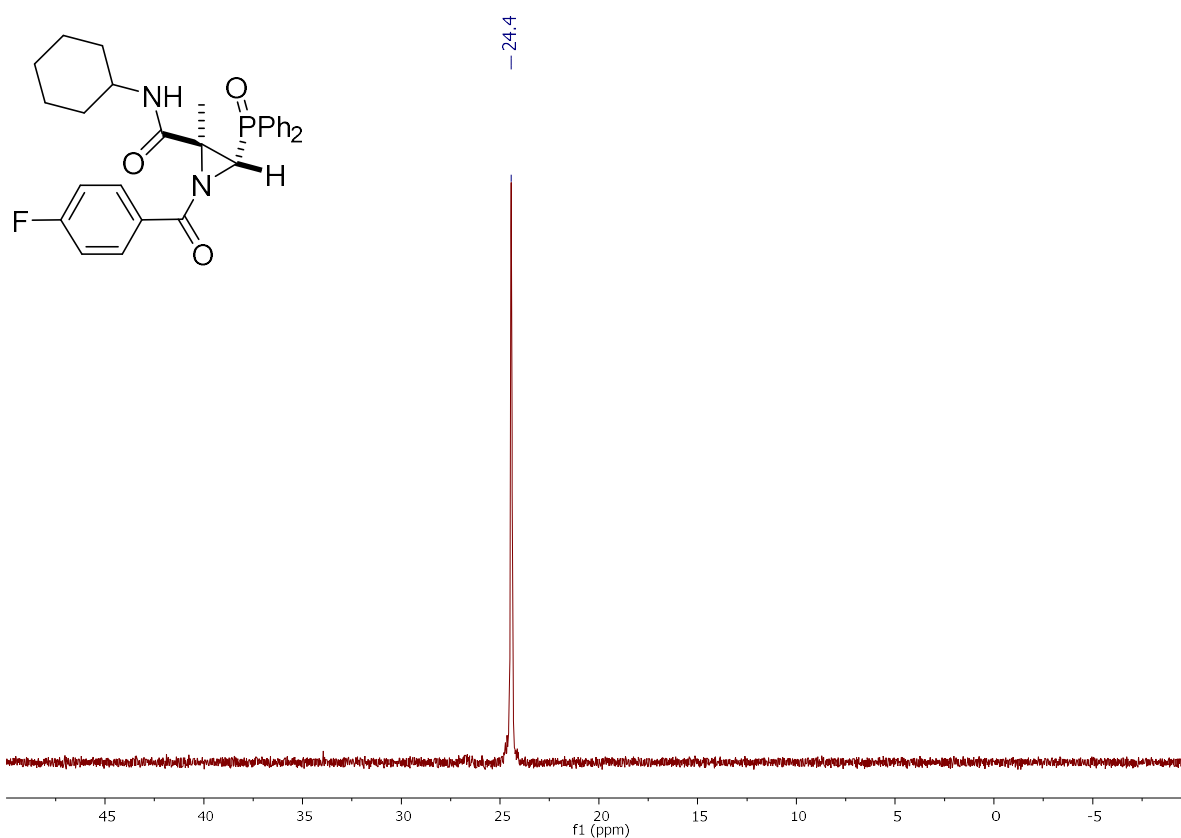

$^{19}\text{F}$  (376 MHz,  $\text{CDCl}_3$ ) of *N*-Acylaziridine Phosphine Oxide **4d**

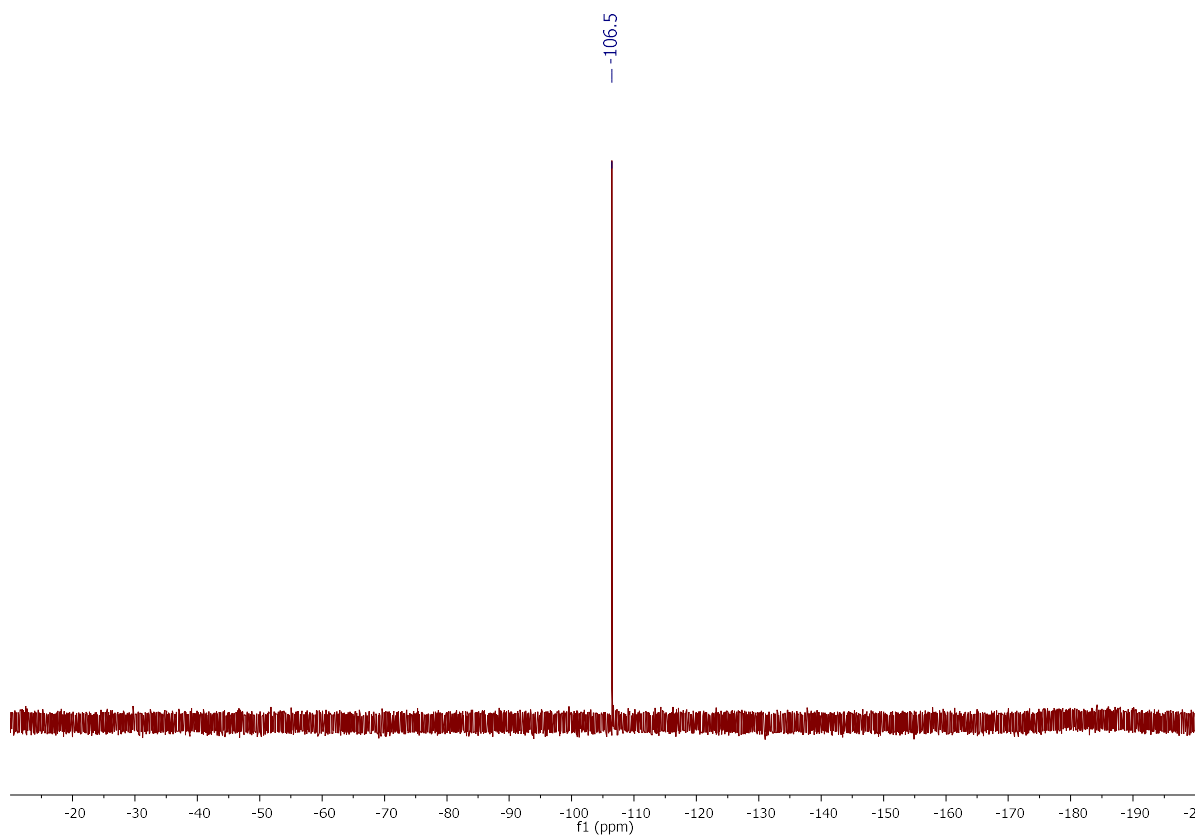

$^1\text{H}$  NMR (400 MHz,  $\text{CDCl}_3$ ) of *N*-Acylaziridine Phosphine Oxide **4e**

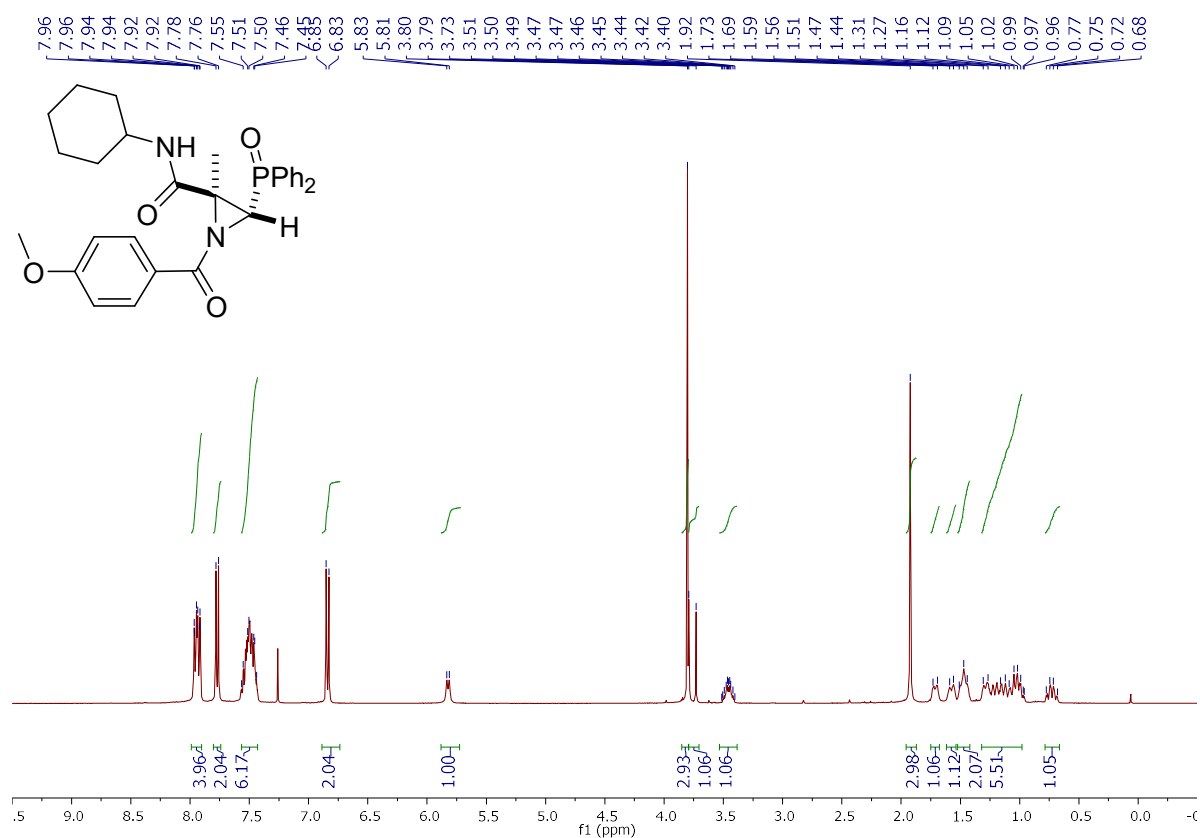

$^{13}\text{C}$   $\{^1\text{H}\}$  NMR (100 MHz,  $\text{CDCl}_3$ ) of *N*-Acylaziridine Phosphine Oxide **4e**

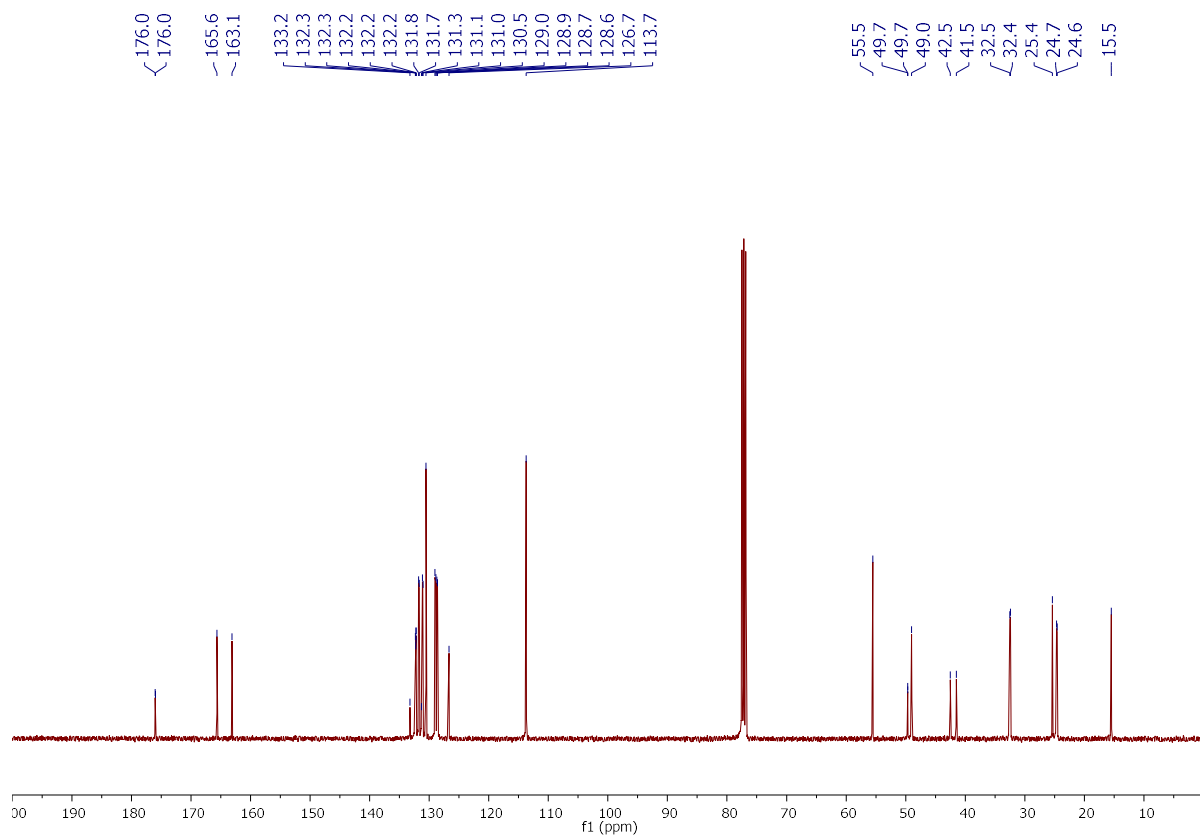

$^{31}\text{P}$  (160 MHz,  $\text{CDCl}_3$ ) of *N*-Acylaziridine Phosphine Oxide **4e**

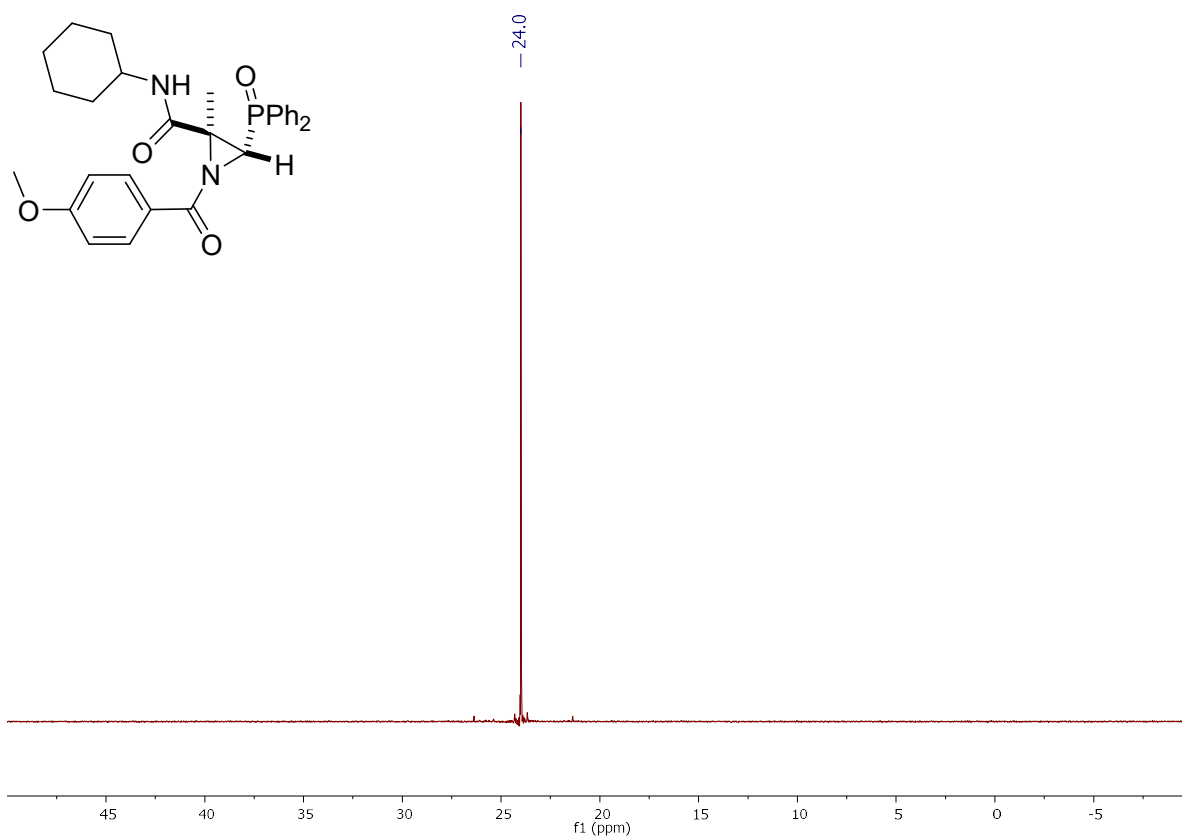

$^1\text{H}$  NMR (400 MHz,  $\text{CDCl}_3$ ) of *N*-Acylaziridine Phosphine Oxide **4f**

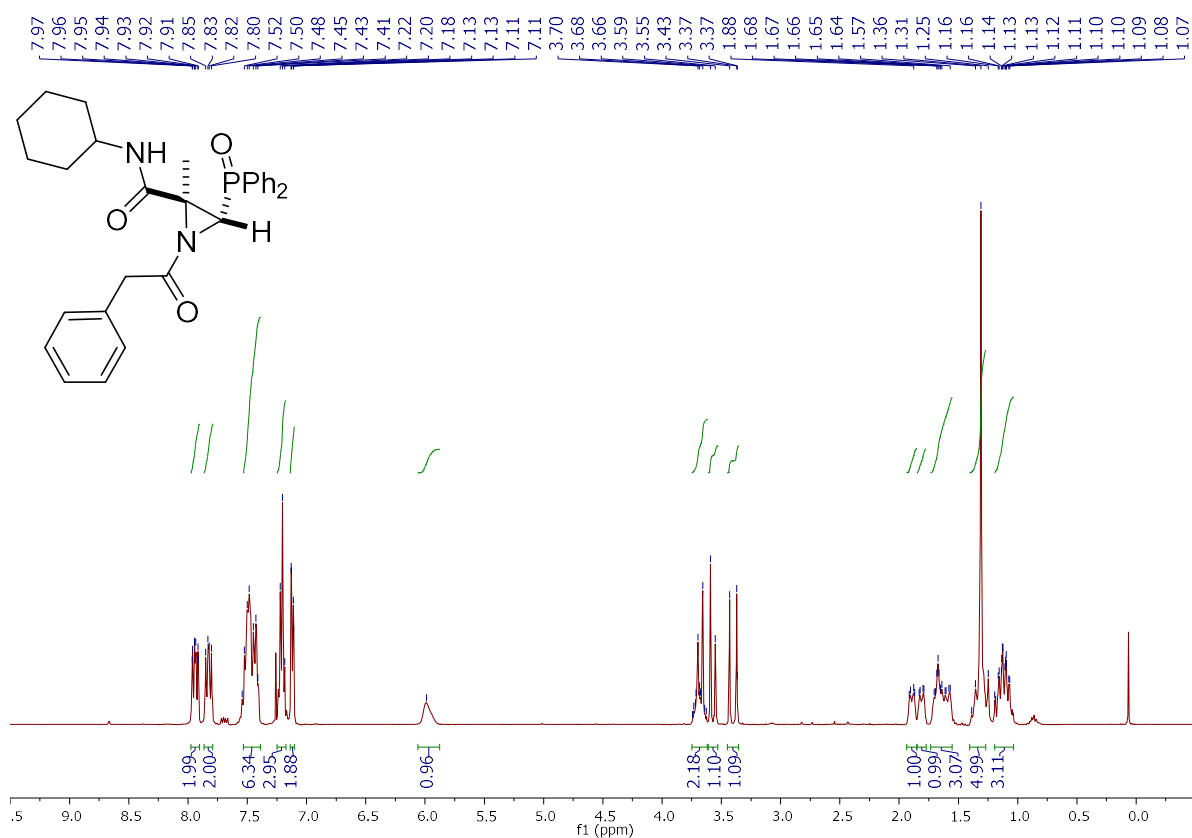

$^{13}\text{C}$  { $^1\text{H}$ } NMR (100 MHz,  $\text{CDCl}_3$ ) of *N*-Acylaziridine Phosphine Oxide **4f**

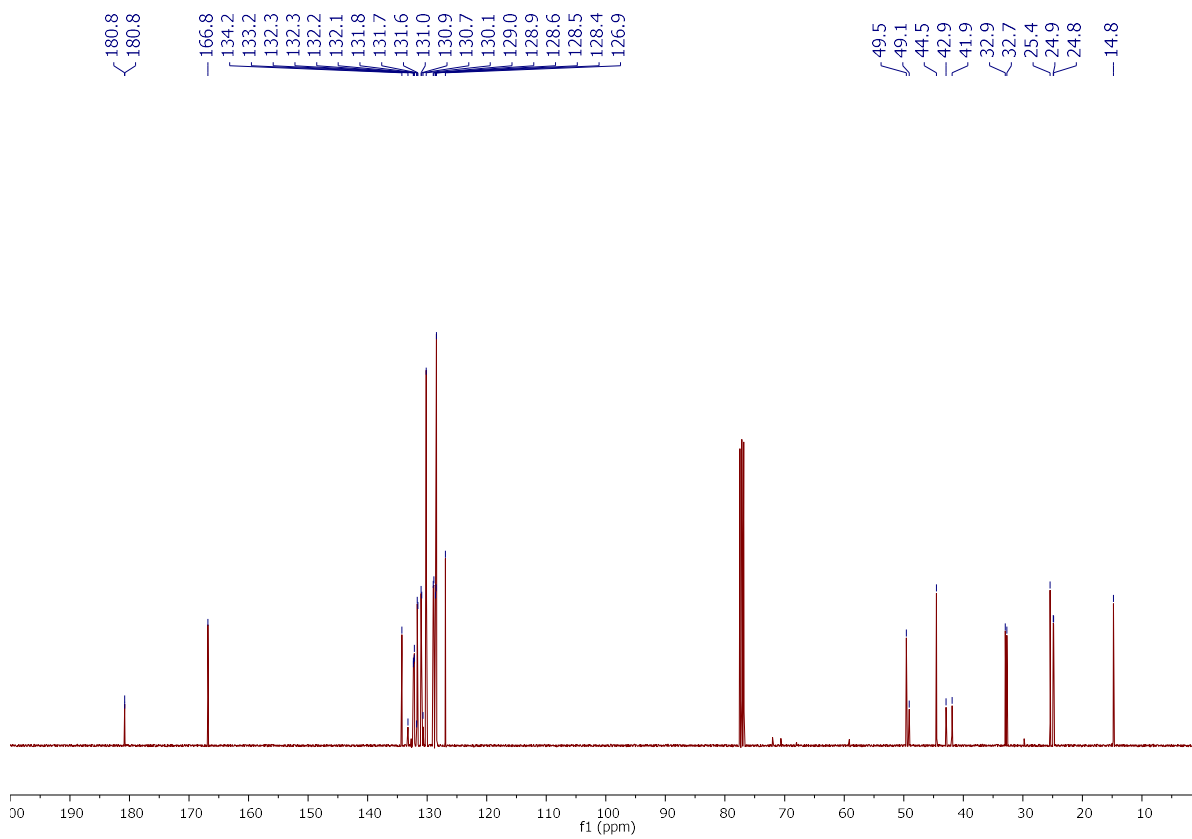

$^{31}\text{P}$  (160 MHz,  $\text{CDCl}_3$ ) of *N*-Acylaziridine Phosphine Oxide **4f**

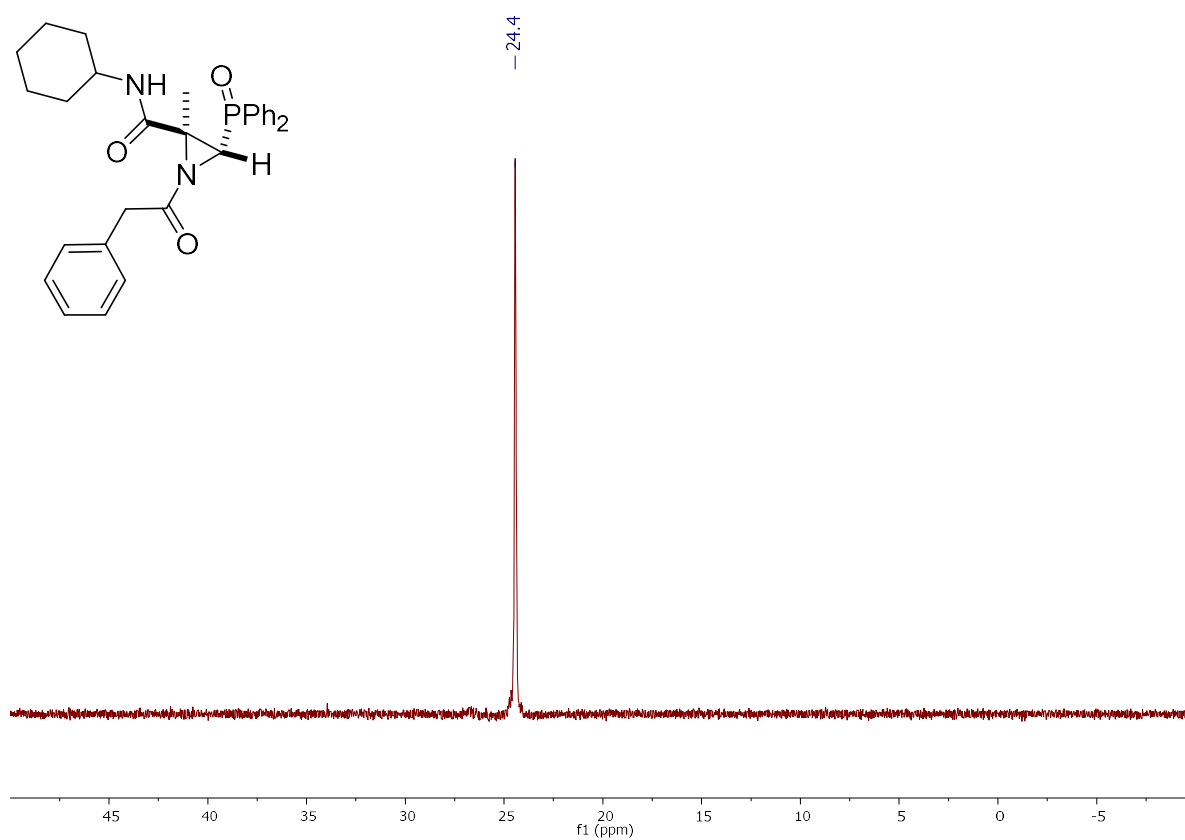

$^1\text{H}$  NMR (400 MHz,  $\text{CDCl}_3$ ) of *N*-Acylaziridine Phosphine Oxide **4g**

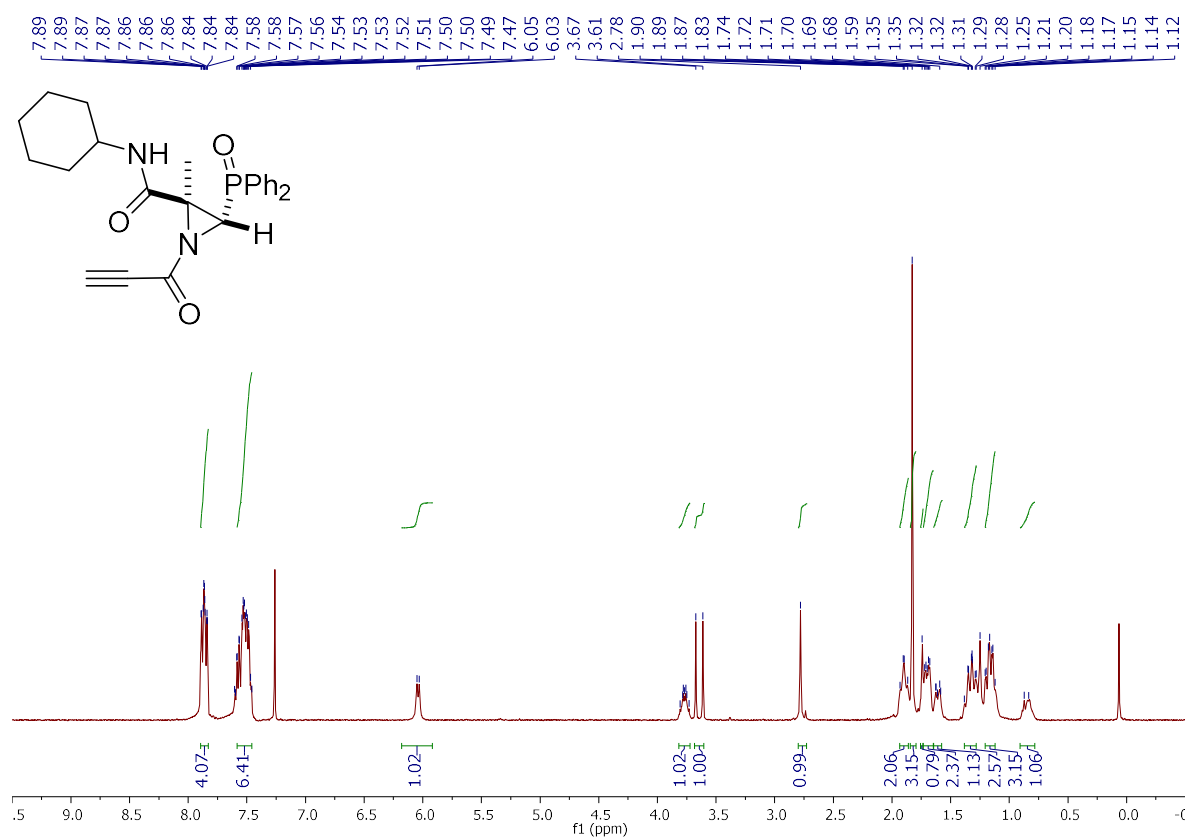

$^{13}\text{C}$   $\{^1\text{H}\}$  NMR (100 MHz,  $\text{CDCl}_3$ ) of *N*-Acylaziridine Phosphine Oxide **4g**

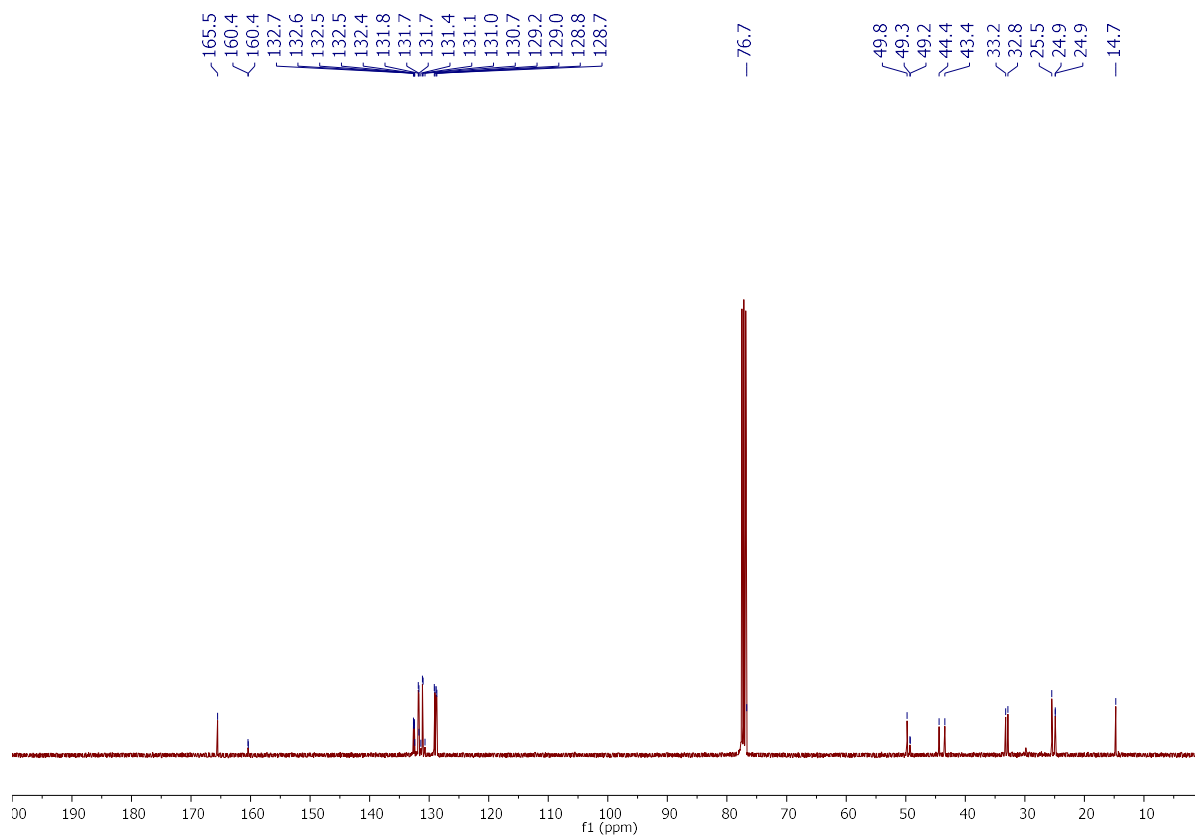

$^{31}\text{P}$  (160 MHz,  $\text{CDCl}_3$ ) of *N*-Acylaziridine Phosphine Oxide **4g**

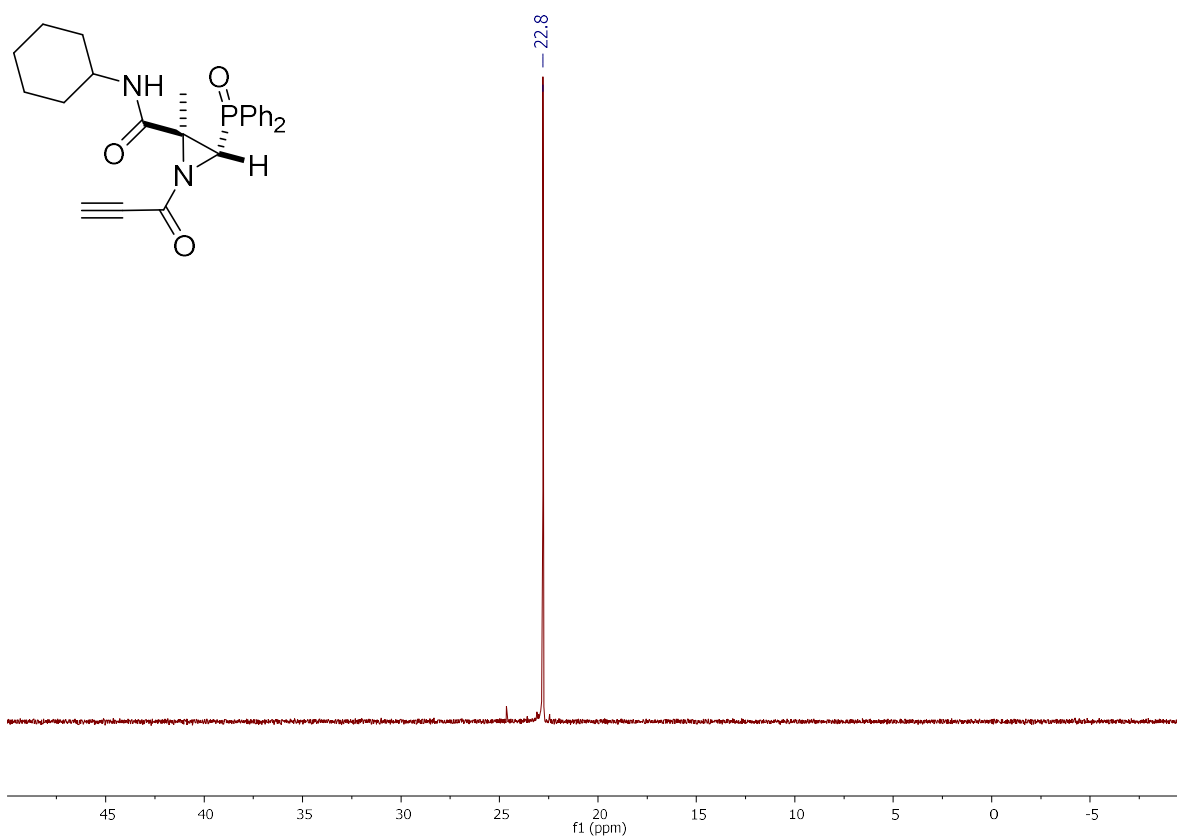

$^1\text{H}$  NMR (400 MHz,  $\text{CDCl}_3$ ) of *N*-Acylaziridine Phosphine Oxide **4h**

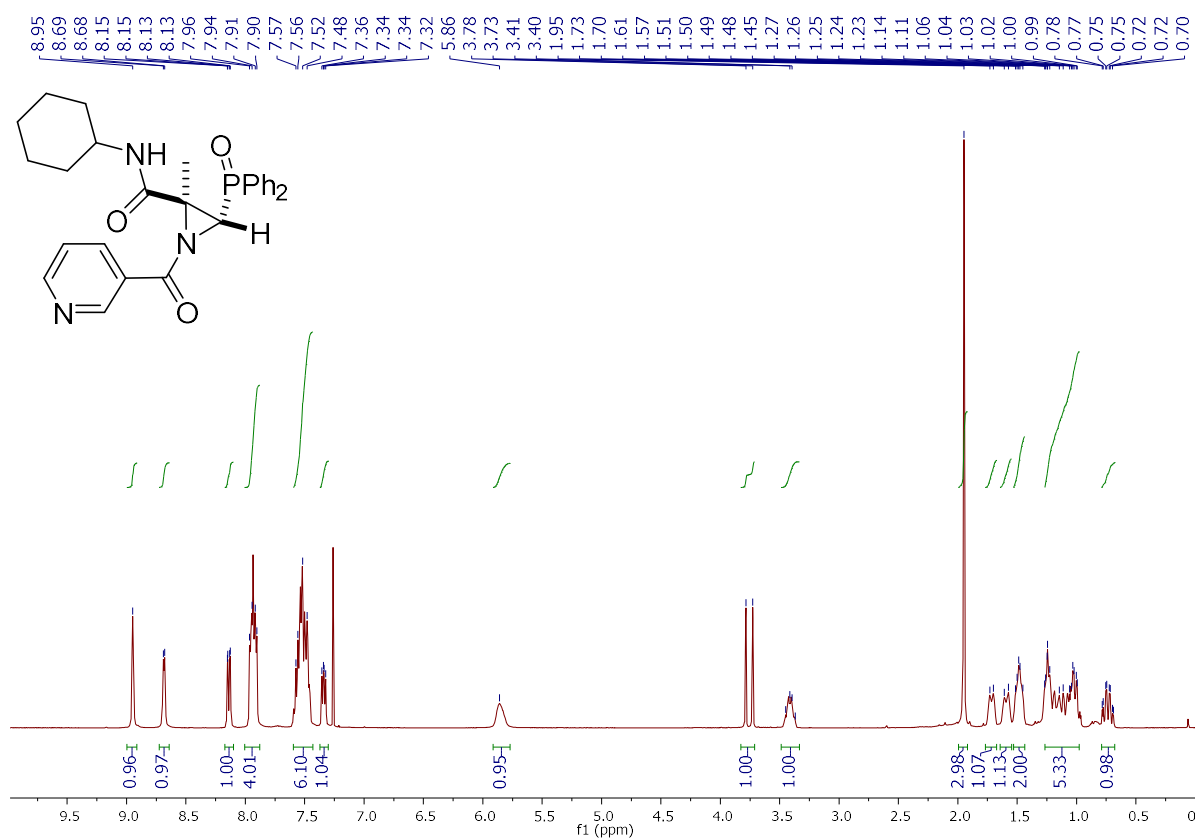

$^{13}\text{C}$   $\{^1\text{H}\}$  NMR (100 MHz,  $\text{CDCl}_3$ ) of *N*-Acylaziridine Phosphine Oxide **4h**

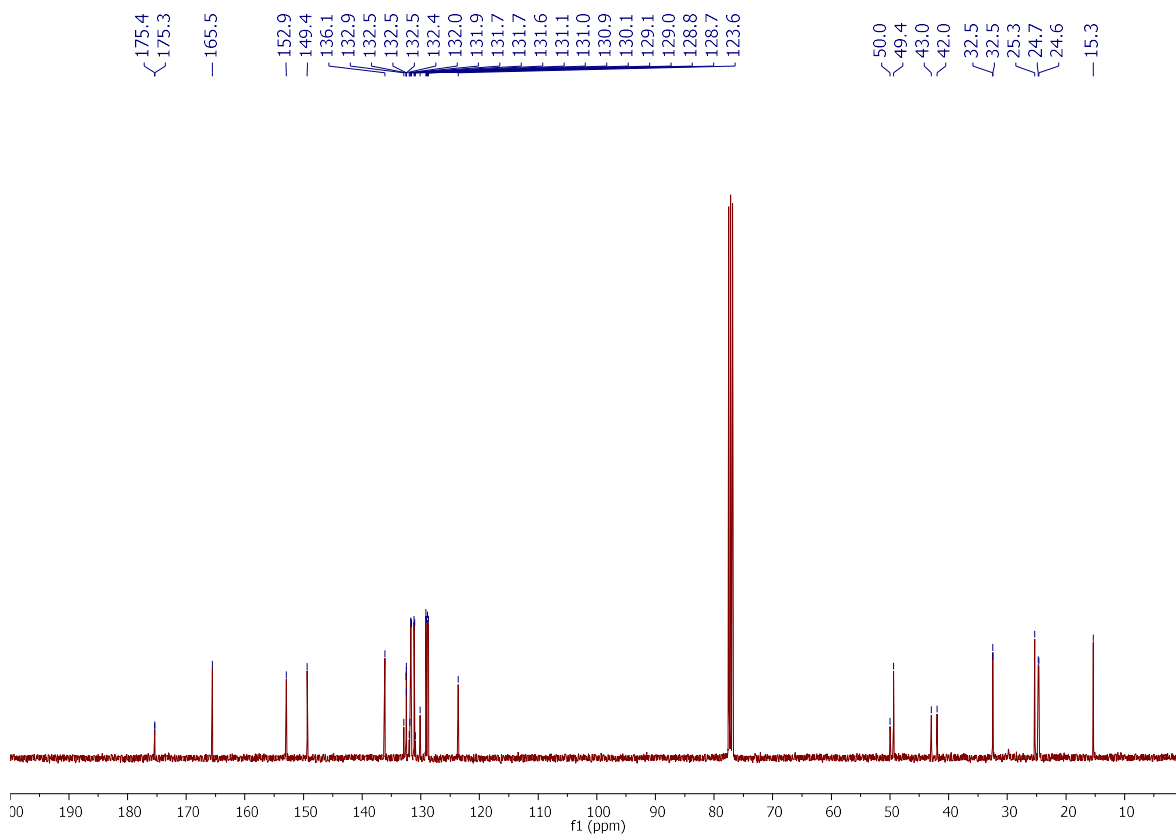



$^{31}\text{P}$  (160 MHz,  $\text{CDCl}_3$ ) of *N*-Acylaziridine Phosphine Oxide **4h**

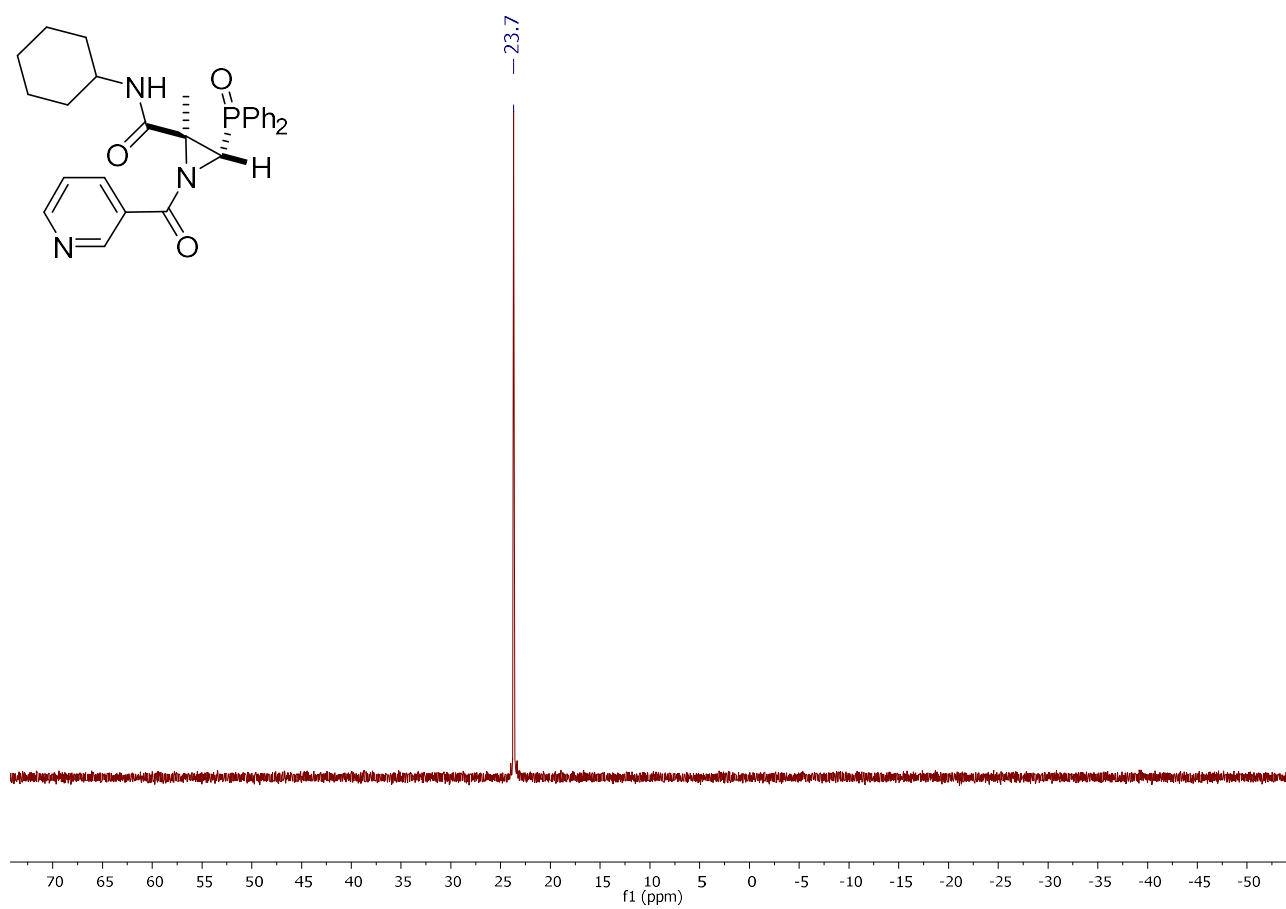

$^1\text{H}$  NMR (400 MHz,  $\text{CDCl}_3$ ) of *N*-Acylaziridine Phosphine Oxide **4i**

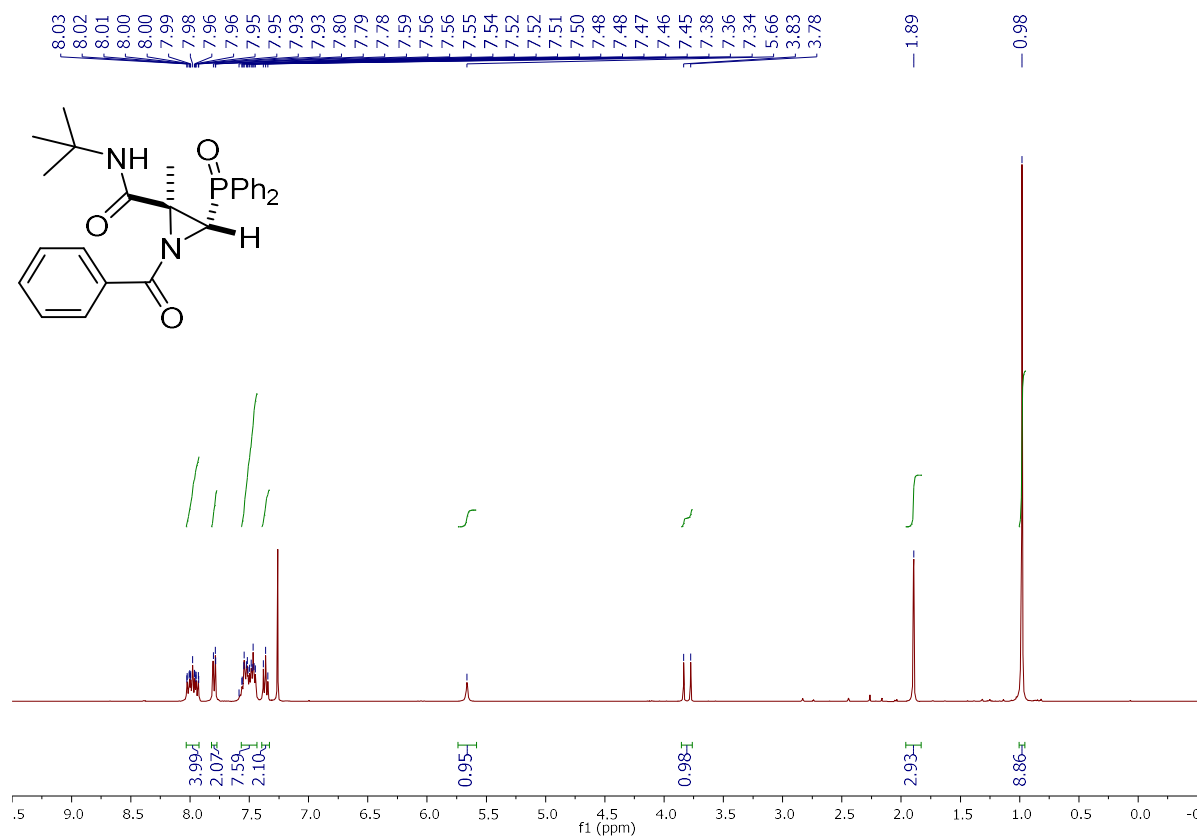

$^{13}\text{C}$  { $^1\text{H}$ } NMR (100 MHz,  $\text{CDCl}_3$ ) of *N*-Acylaziridine Phosphine Oxide **4i**

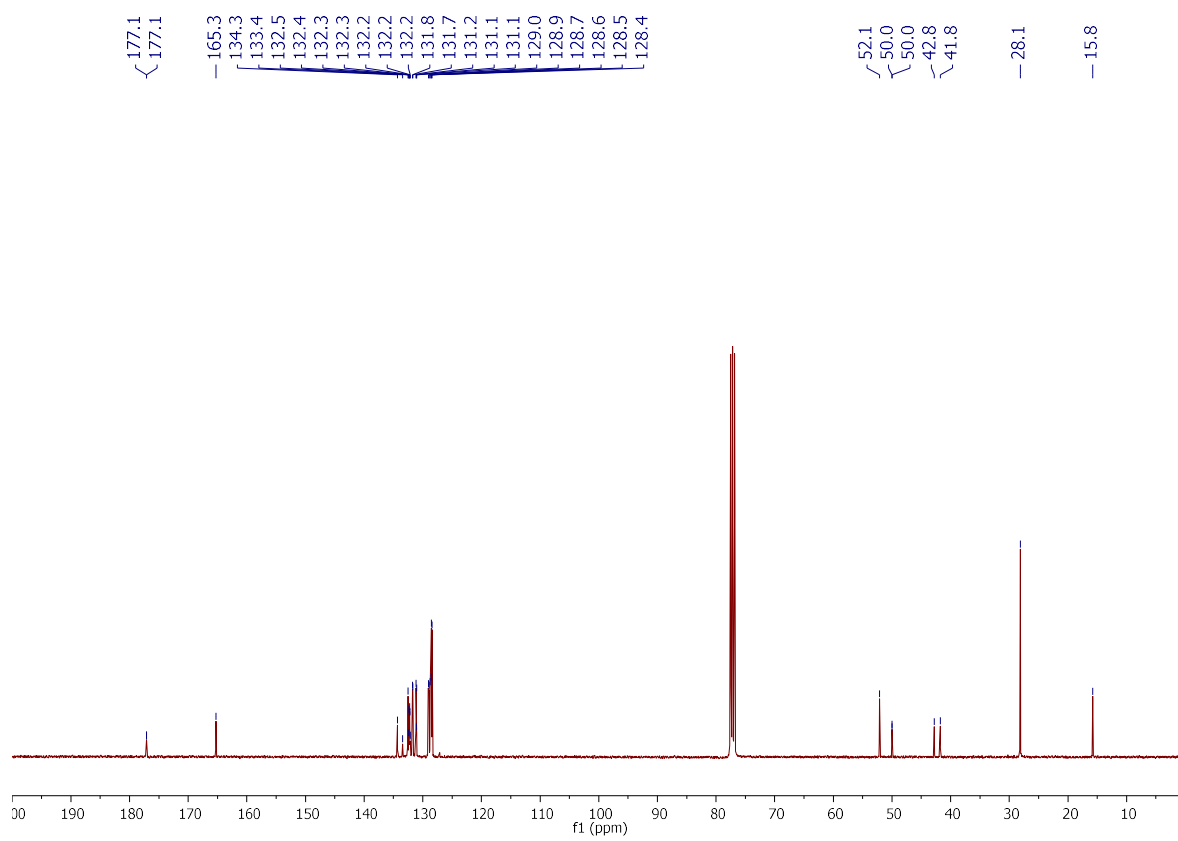

<sup>31</sup>P (160 MHz, CDCl<sub>3</sub>) of *N*-Acylaziridine Phosphine Oxide **4i**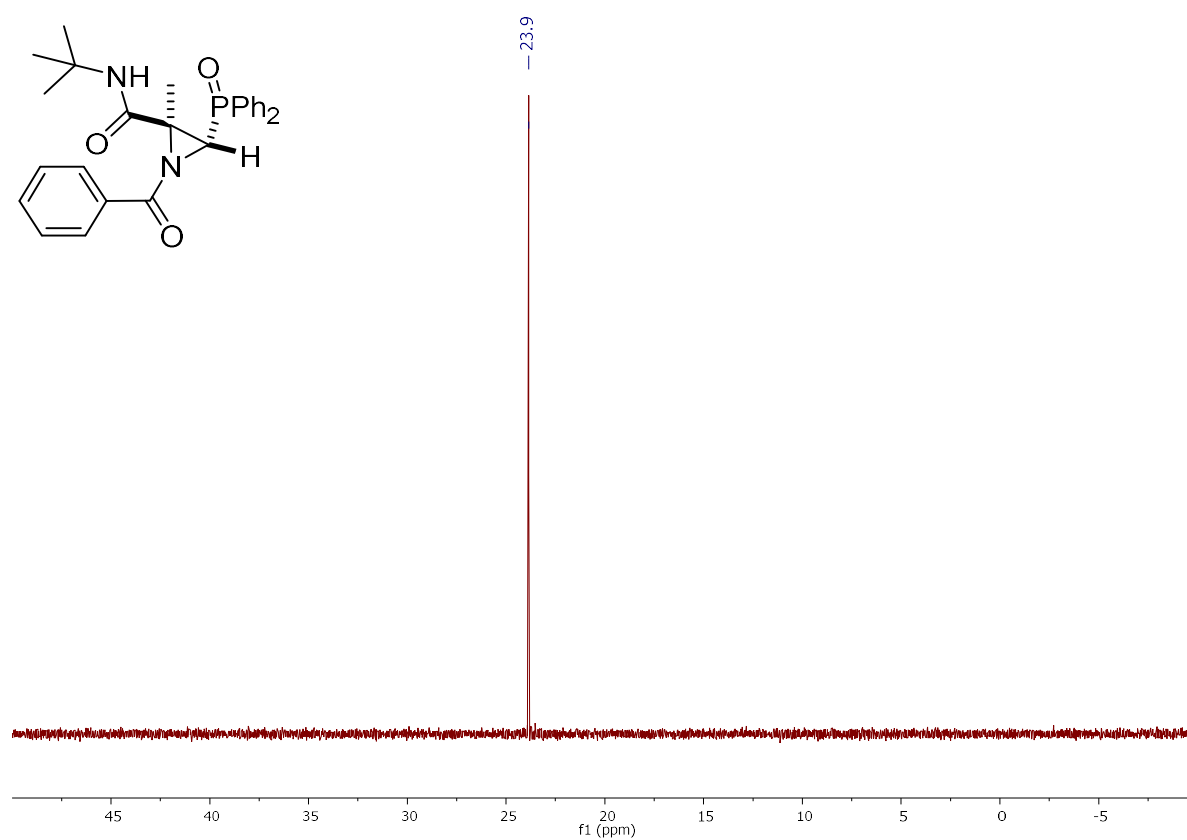

$^1\text{H}$  NMR (400 MHz,  $\text{CDCl}_3$ ) of *N*-Acylaziridine Phosphine Oxide **4j**

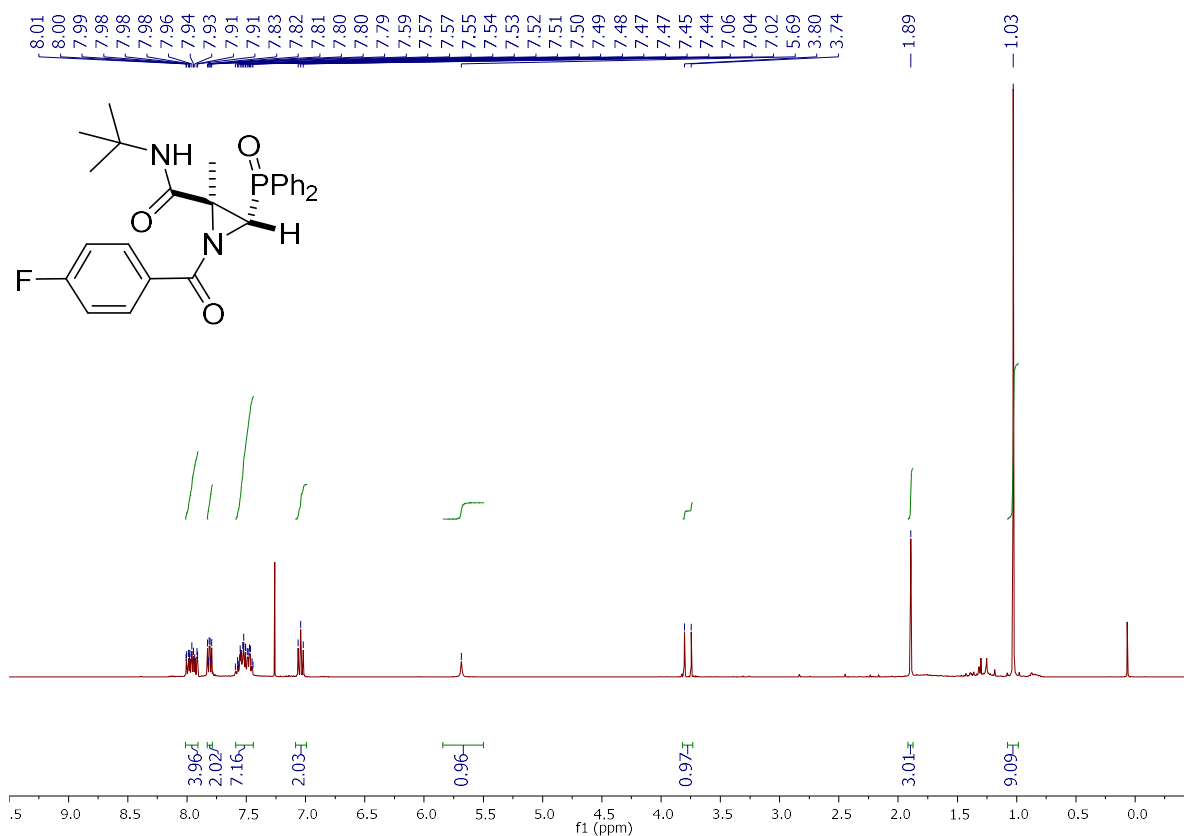

$^{13}\text{C}$   $\{^1\text{H}\}$  NMR (100 MHz,  $\text{CDCl}_3$ ) of *N*-Acylaziridine Phosphine Oxide **4j**

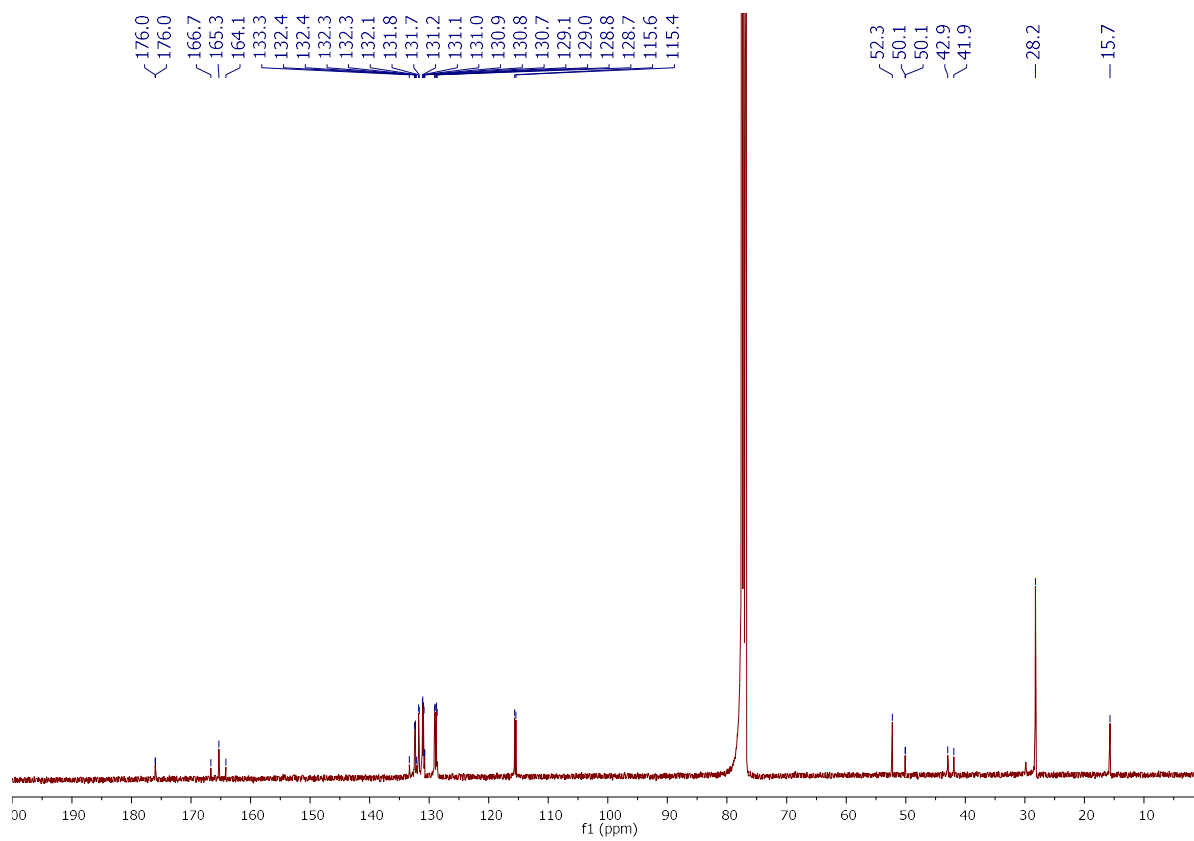

$^{31}\text{P}$  (160 MHz,  $\text{CDCl}_3$ ) of *N*-Acylaziridine Phosphine Oxide **4j**

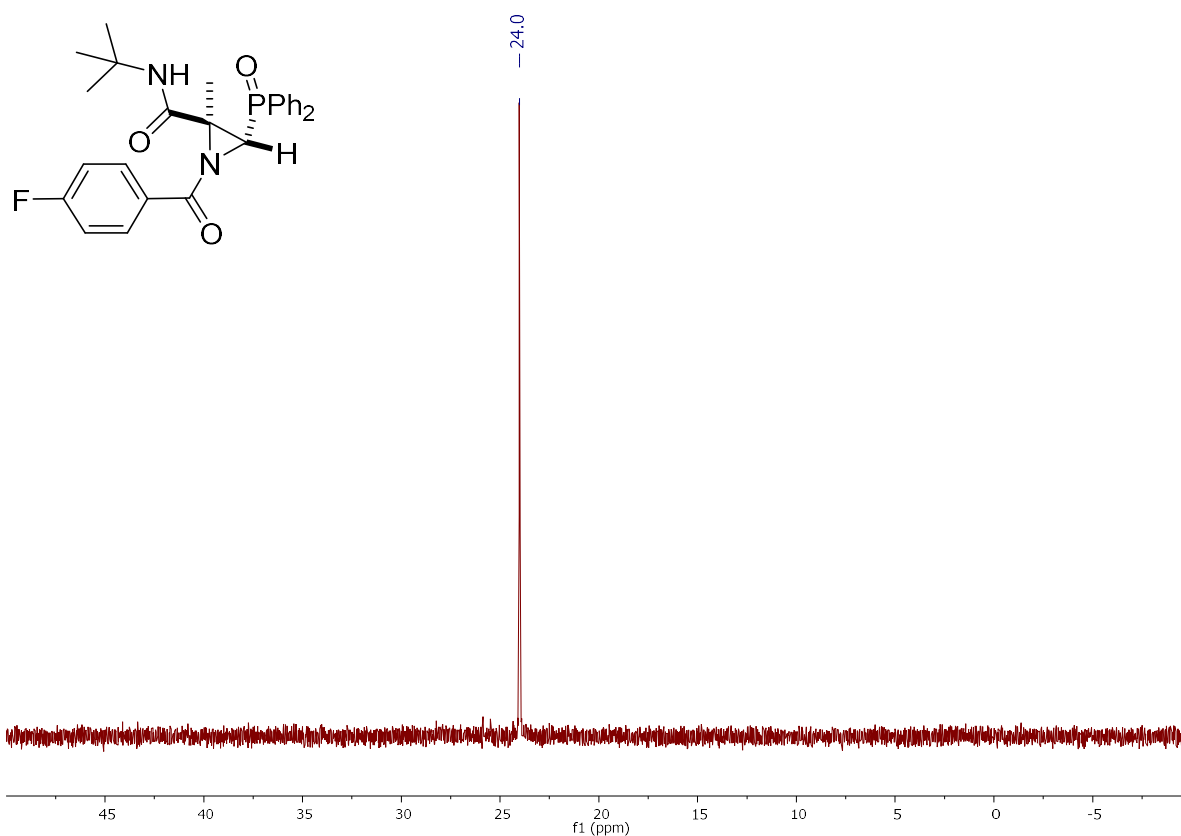

$^{19}\text{F}$  (376 MHz,  $\text{CDCl}_3$ ) of *N*-Acylaziridine Phosphine Oxide **4j**

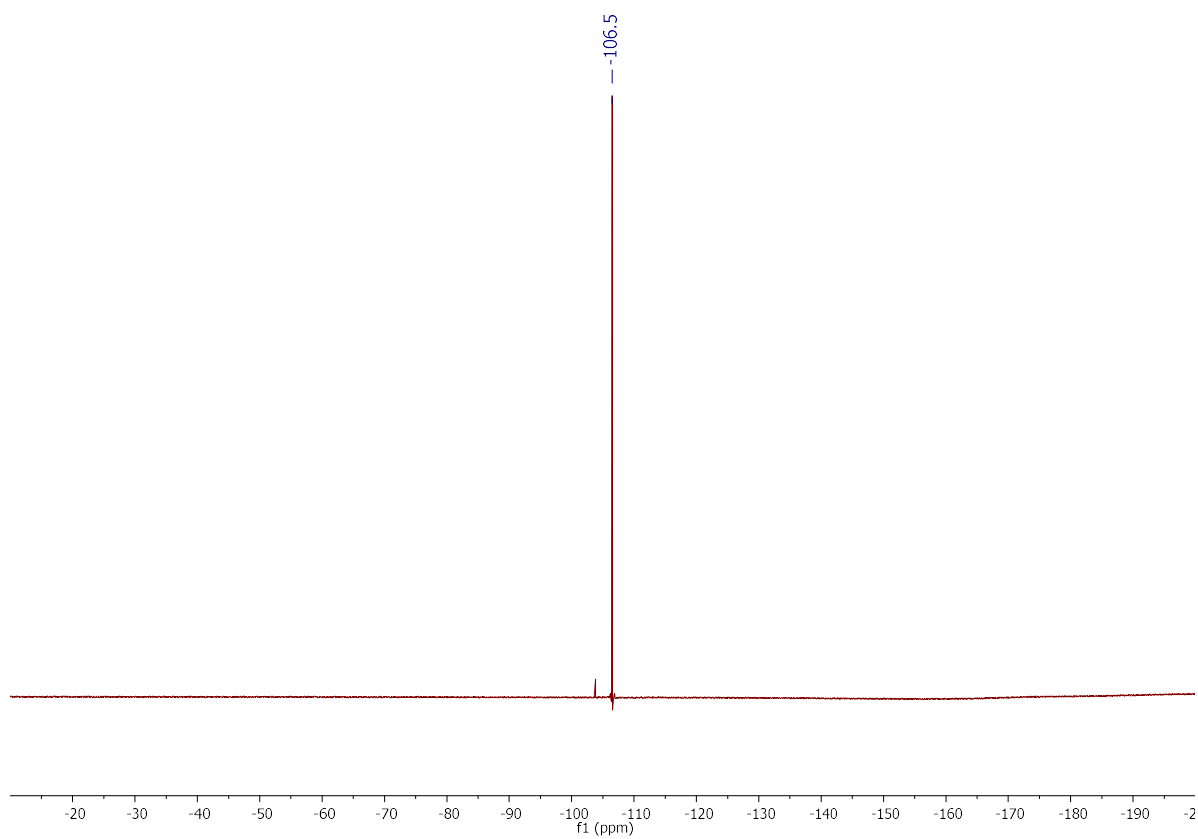

$^1\text{H}$  NMR (400 MHz,  $\text{CDCl}_3$ ) of *N*-Acylaziridine Phosphine Oxide **4k**

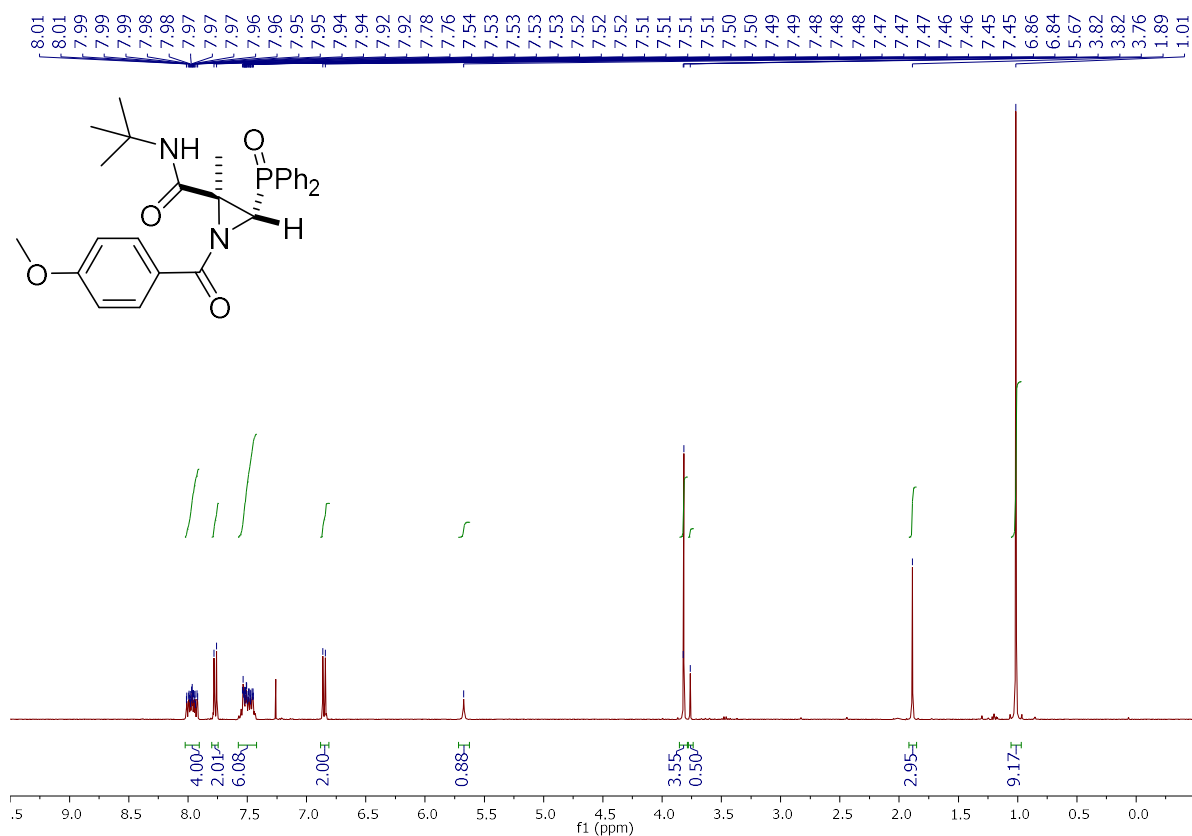

$^{13}\text{C}$  { $^1\text{H}$ } NMR (100 MHz,  $\text{CDCl}_3$ ) of *N*-Acylaziridine Phosphine Oxide **4k**

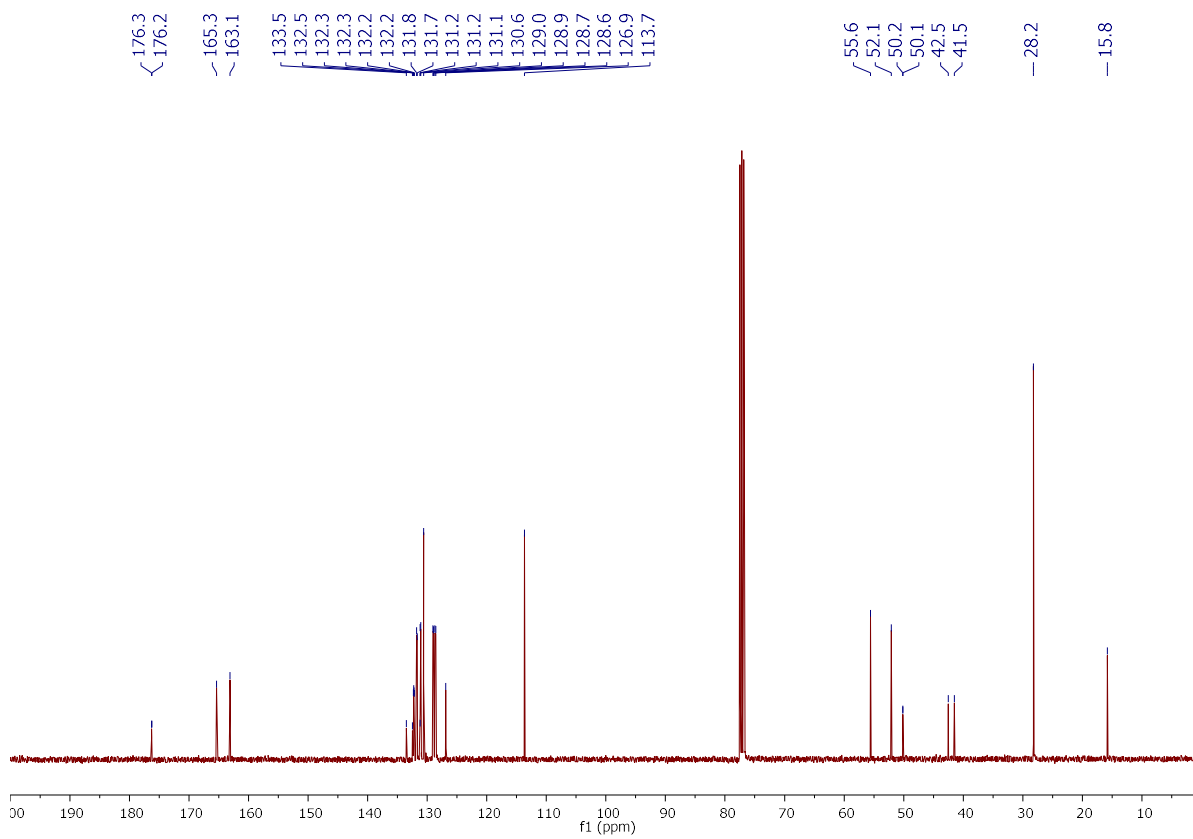

$^{31}\text{P}$  (160 MHz,  $\text{CDCl}_3$ ) of *N*-Acylaziridine Phosphine Oxide **4k**

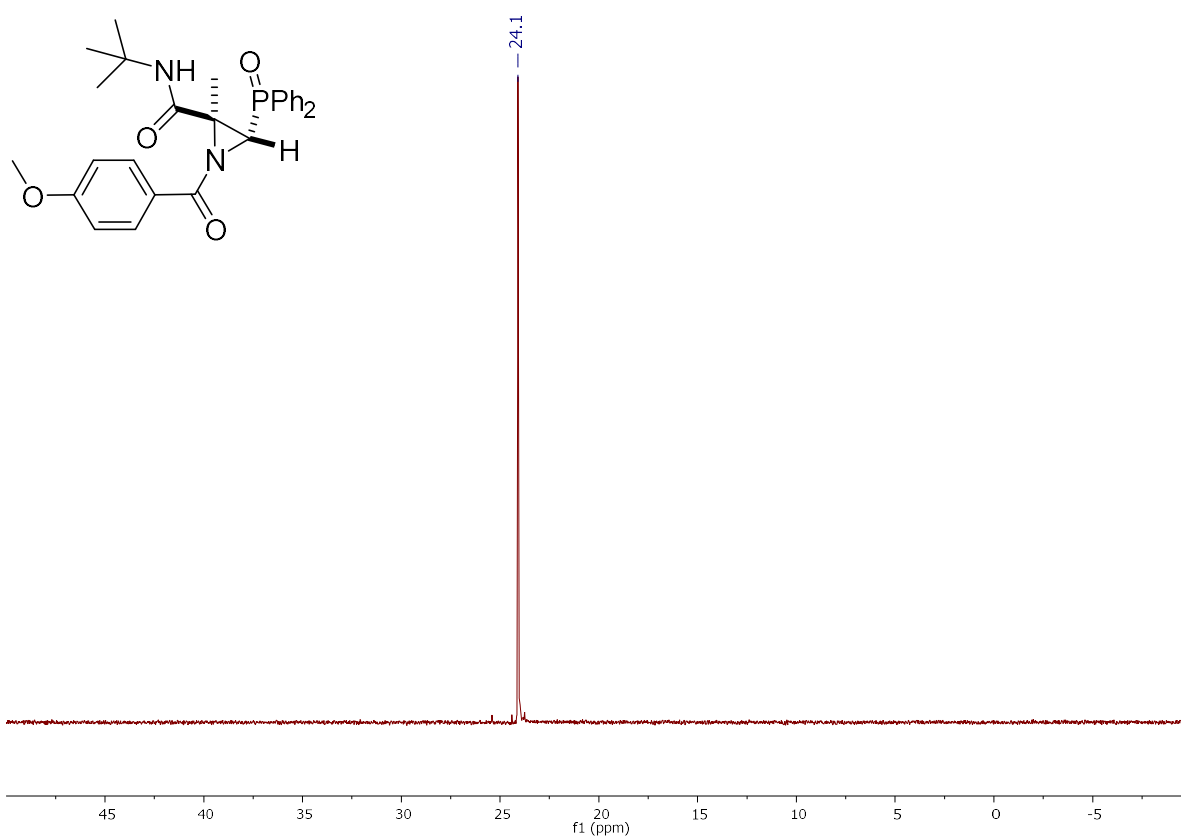

$^1\text{H}$  NMR (400 MHz,  $\text{CDCl}_3$ ) of *N*-Acylaziridine Phosphine Oxide **4I**

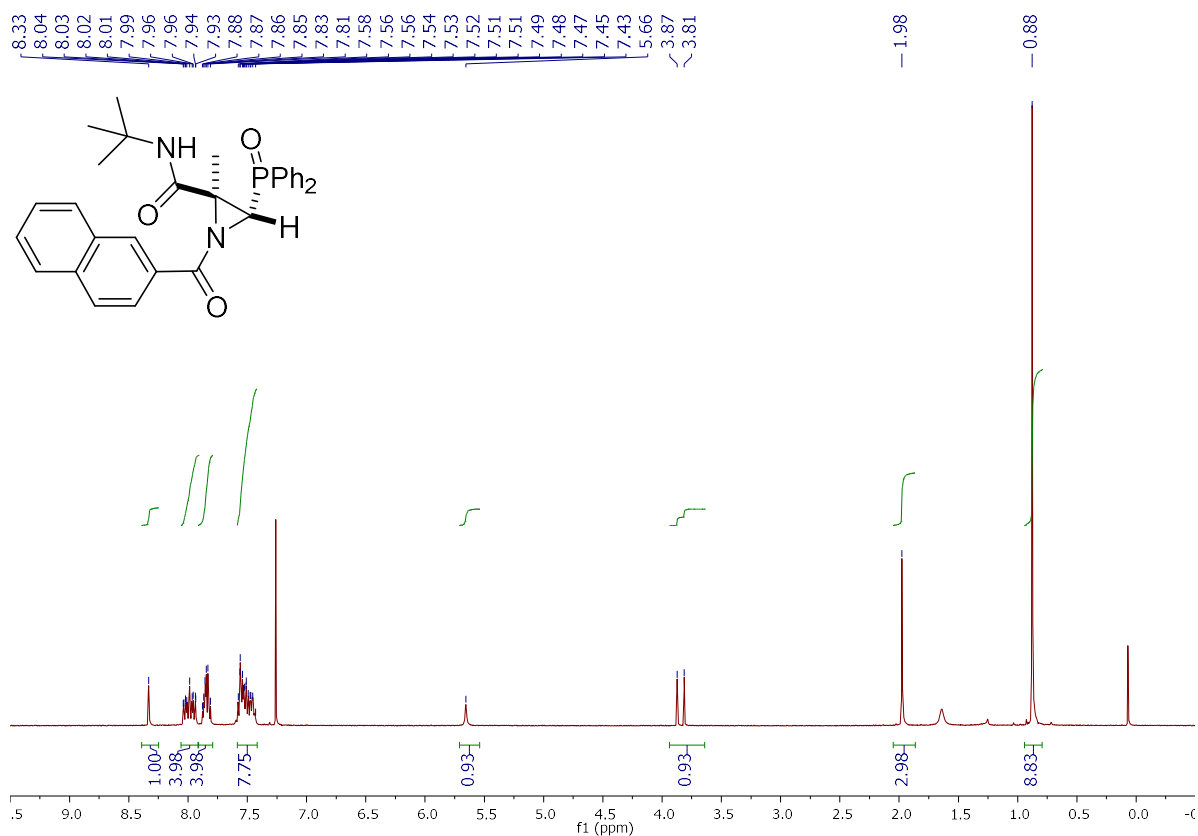

$^{13}\text{C}$  { $^1\text{H}$ } NMR (100 MHz,  $\text{CDCl}_3$ ) of *N*-Acylaziridine Phosphine Oxide **4I**

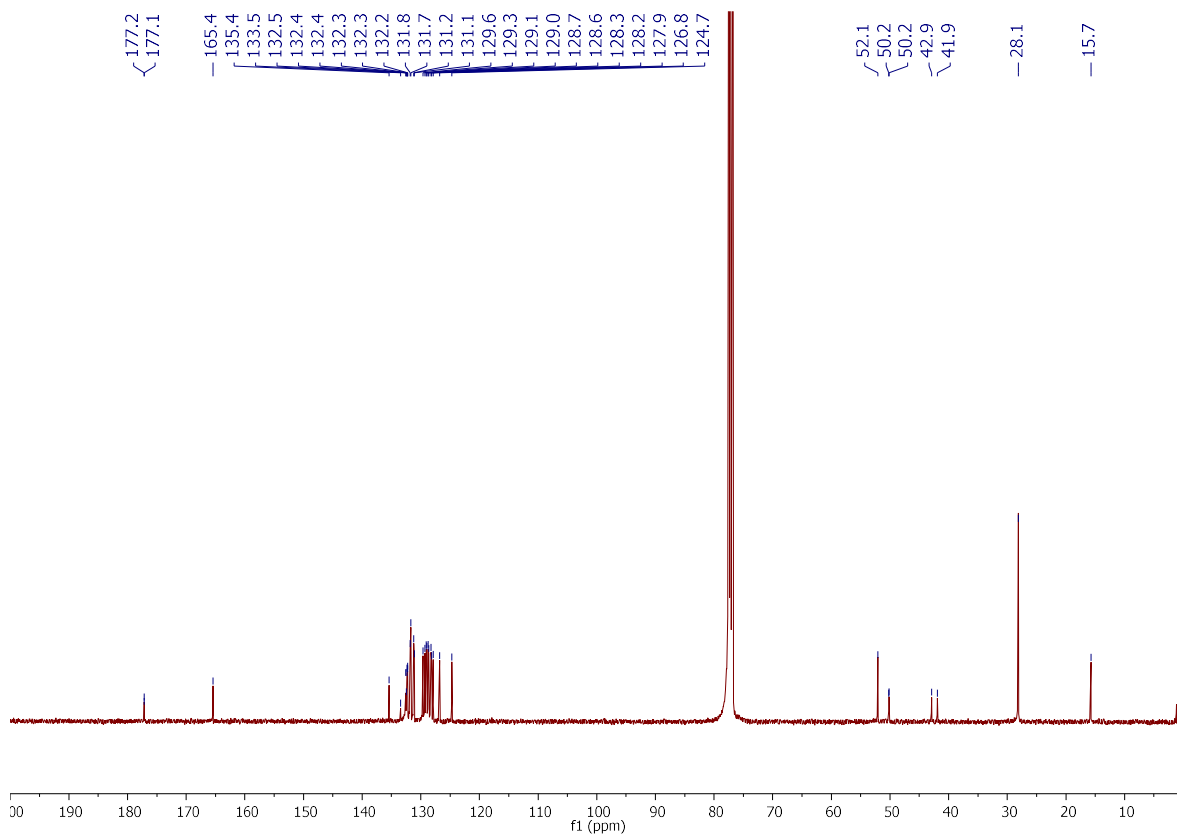



<sup>31</sup>P (160 MHz, CDCl<sub>3</sub>) of *N*-Acylaziridine Phosphine Oxide **4l**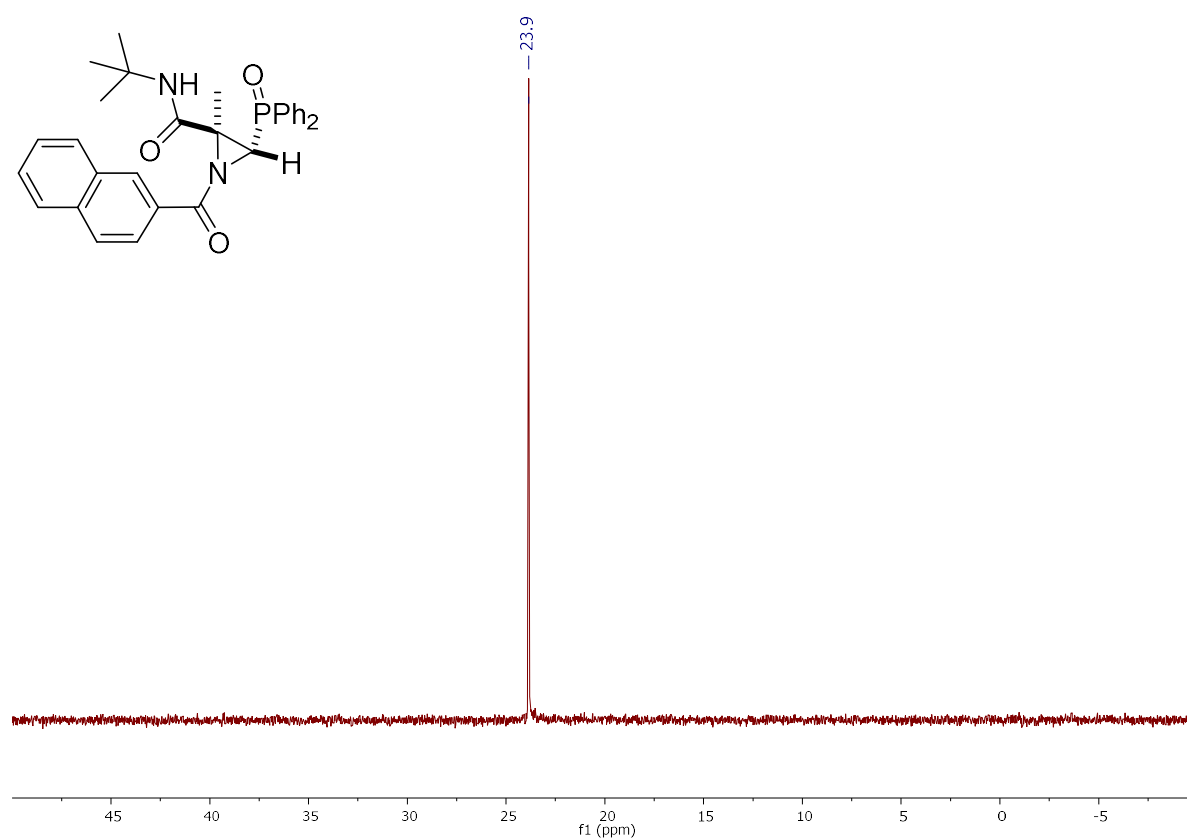

<sup>1</sup>H NMR (400 MHz, CDCl<sub>3</sub>) of *N*-Acylaziridine Phosphine Oxide **4m**

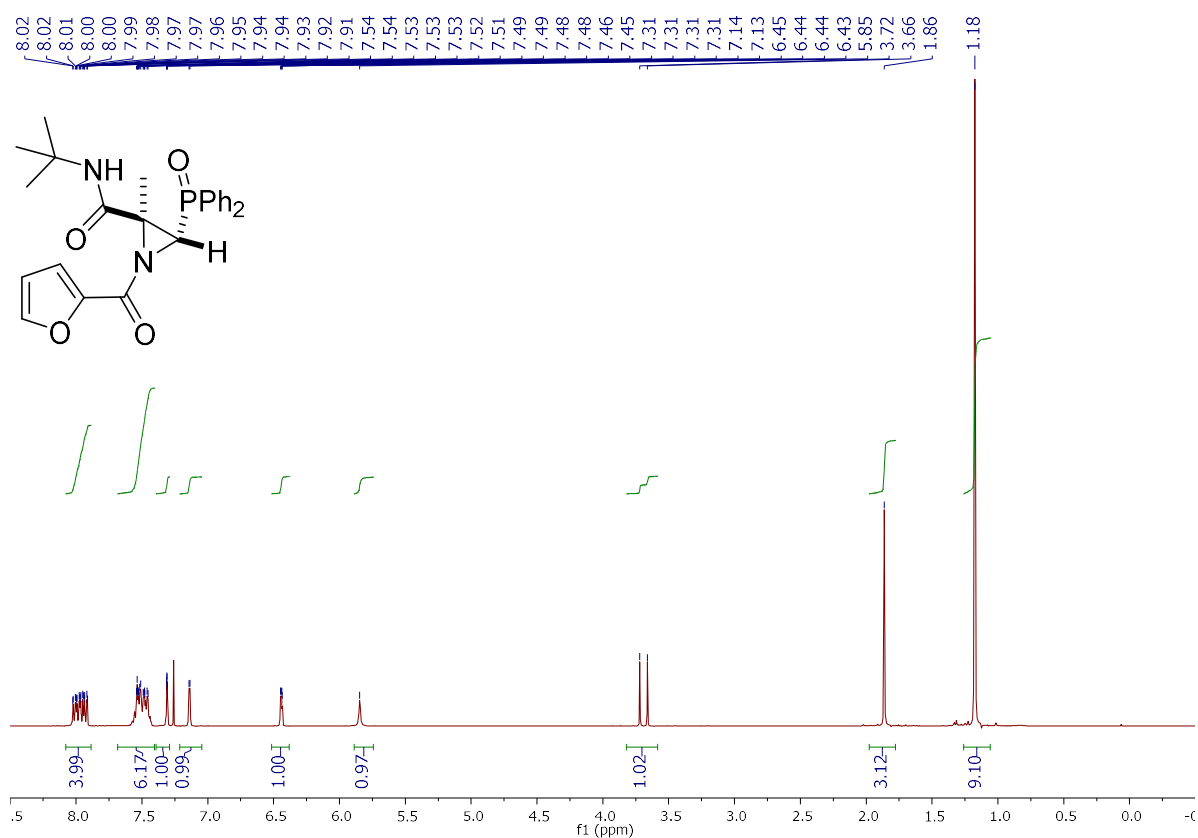

<sup>13</sup>C {<sup>1</sup>H} NMR (100 MHz, CDCl<sub>3</sub>) of *N*-Acylaziridine Phosphine Oxide **4m**

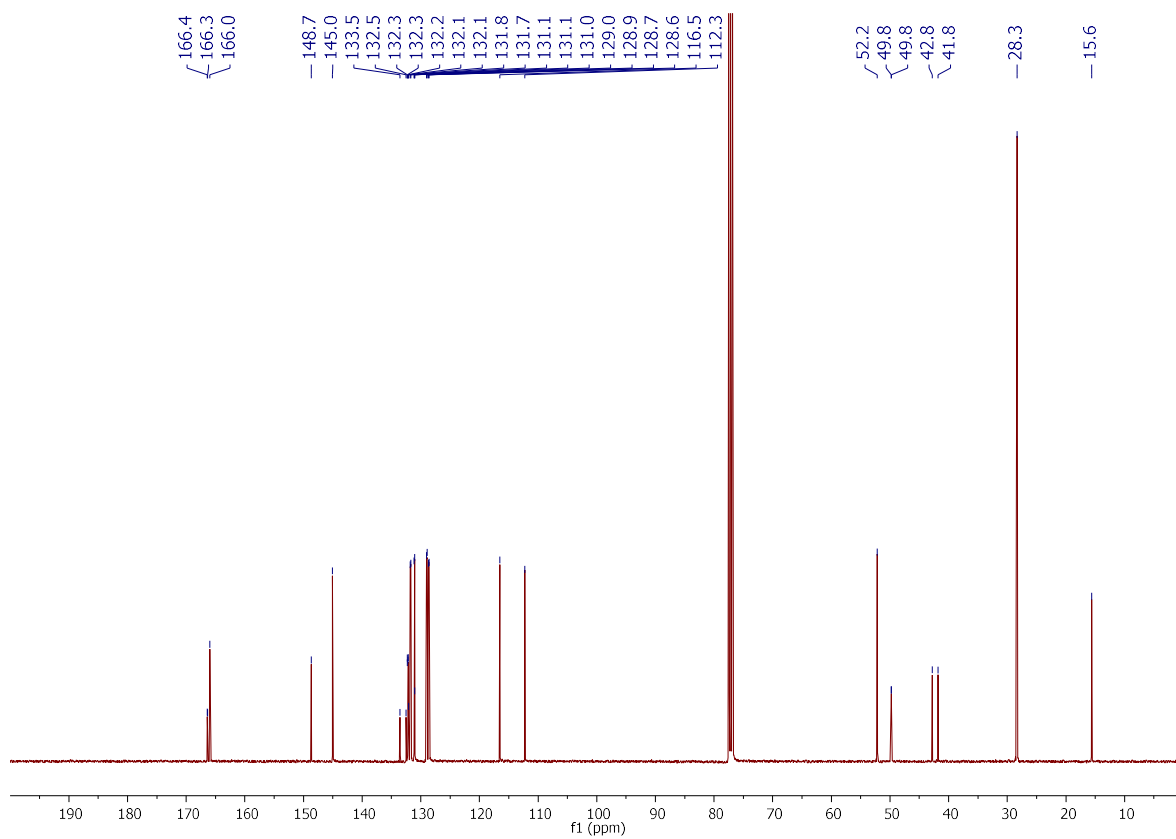

$^{31}\text{P}$  (160 MHz,  $\text{CDCl}_3$ ) of *N*-Acylaziridine Phosphine Oxide **4m**

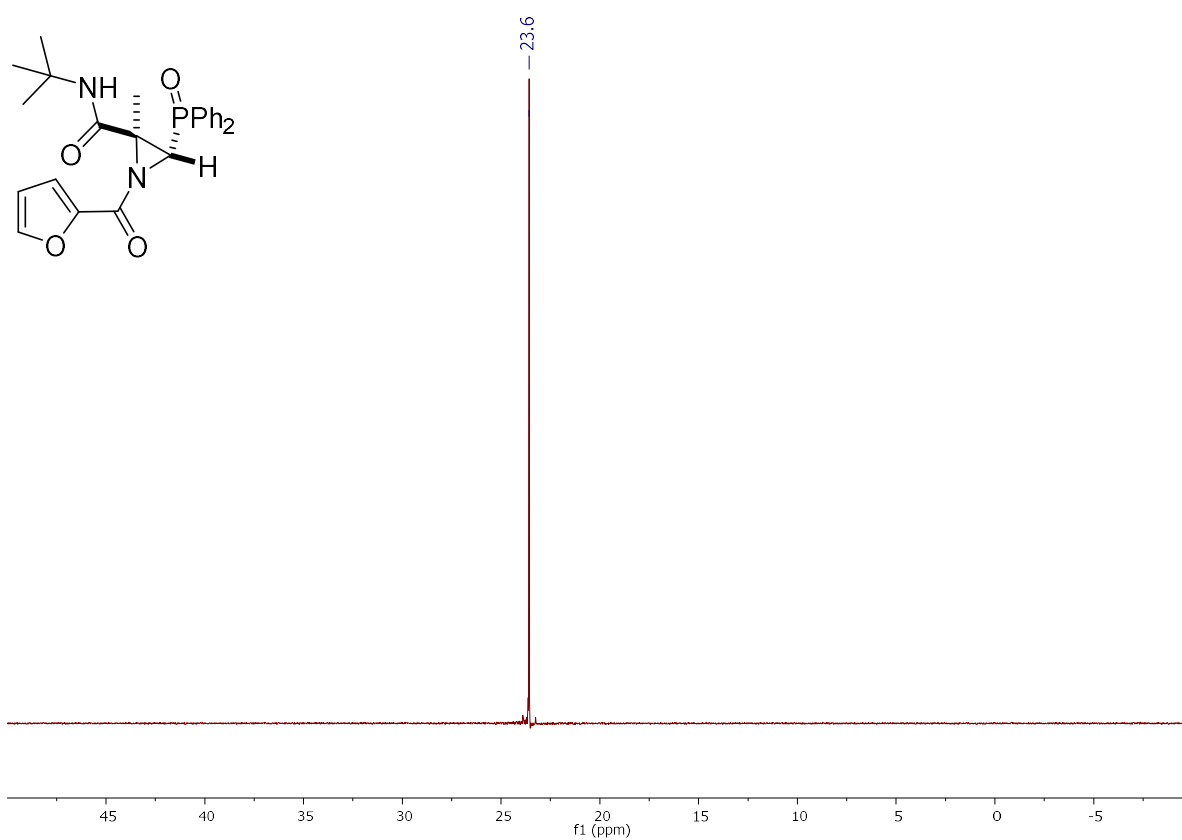

$^1\text{H}$  NMR (400 MHz,  $\text{CDCl}_3$ ) of *N*-Acylaziridine Phosphine Oxide **4n**

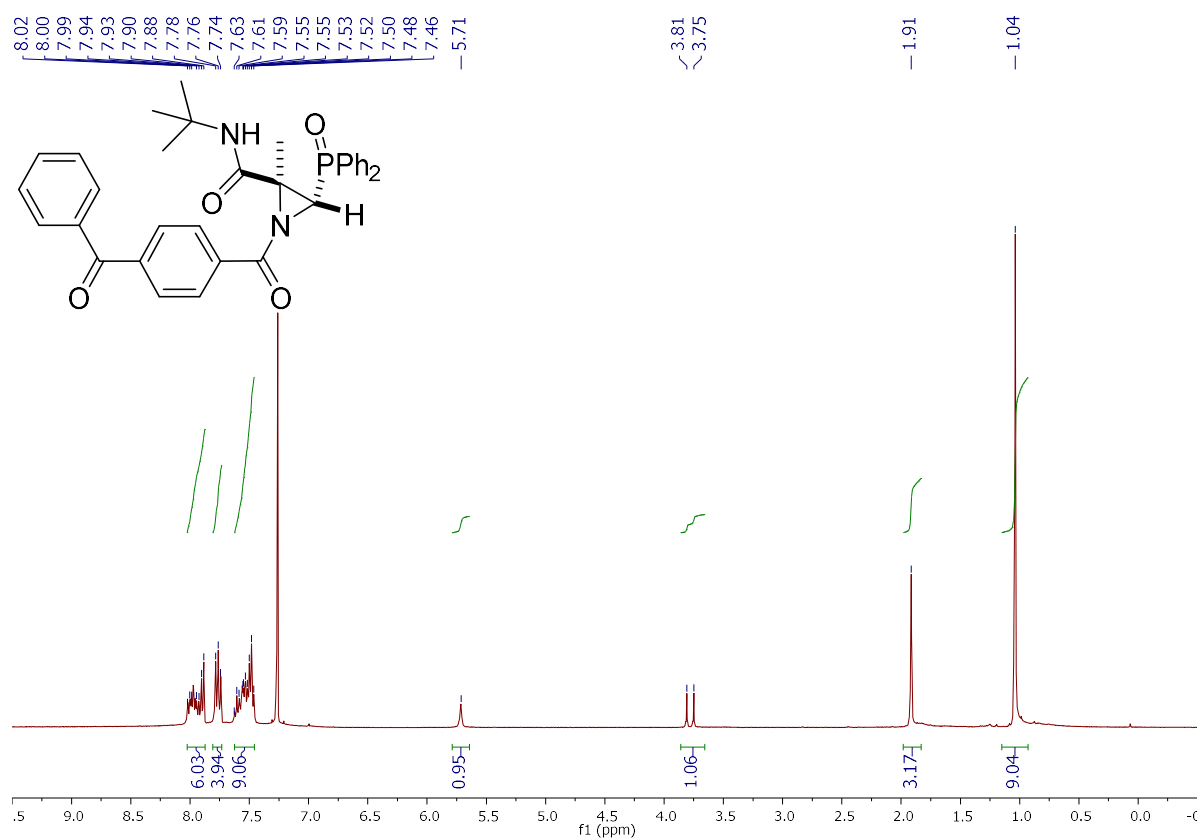

$^{13}\text{C}$  { $^1\text{H}$ } NMR (100 MHz,  $\text{CDCl}_3$ ) of *N*-Acylaziridine Phosphine Oxide **4n**

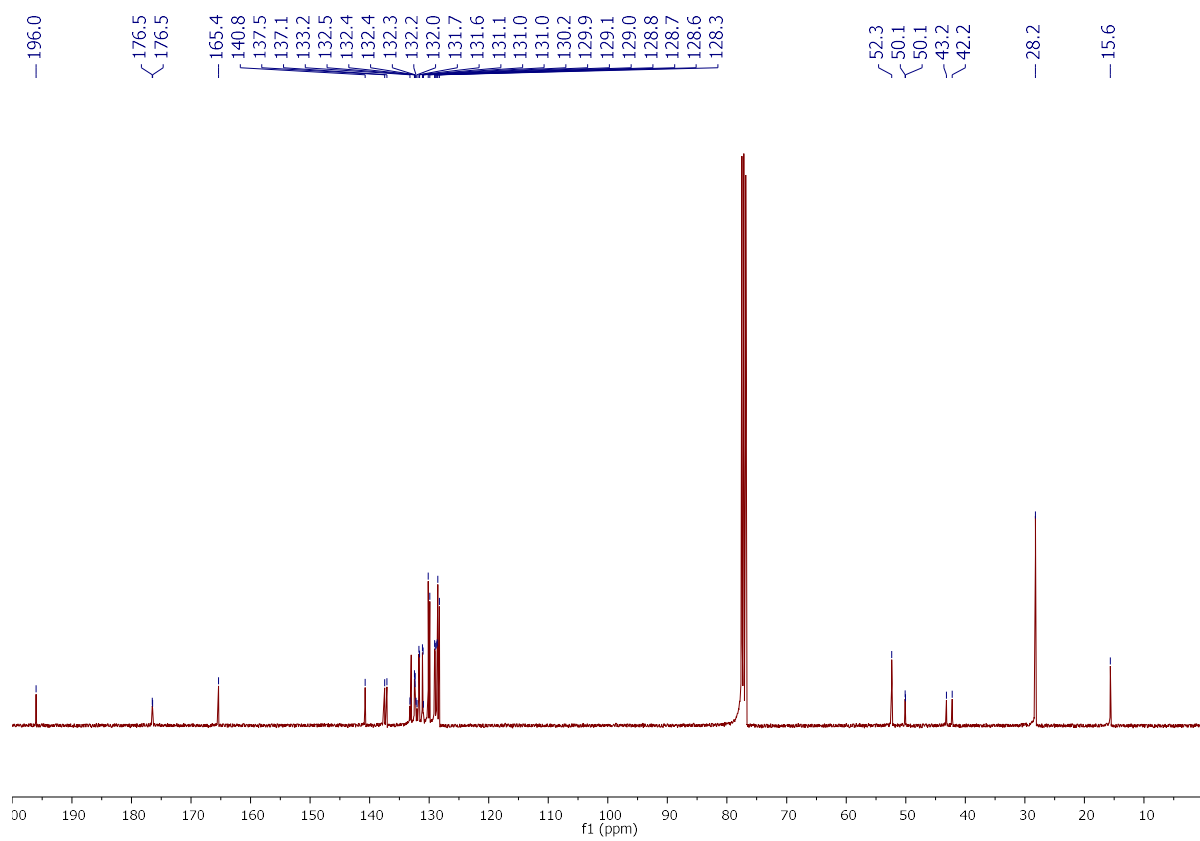

$^{31}\text{P}$  (160 MHz,  $\text{CDCl}_3$ ) of *N*-Acylaziridine Phosphine Oxide **4n**

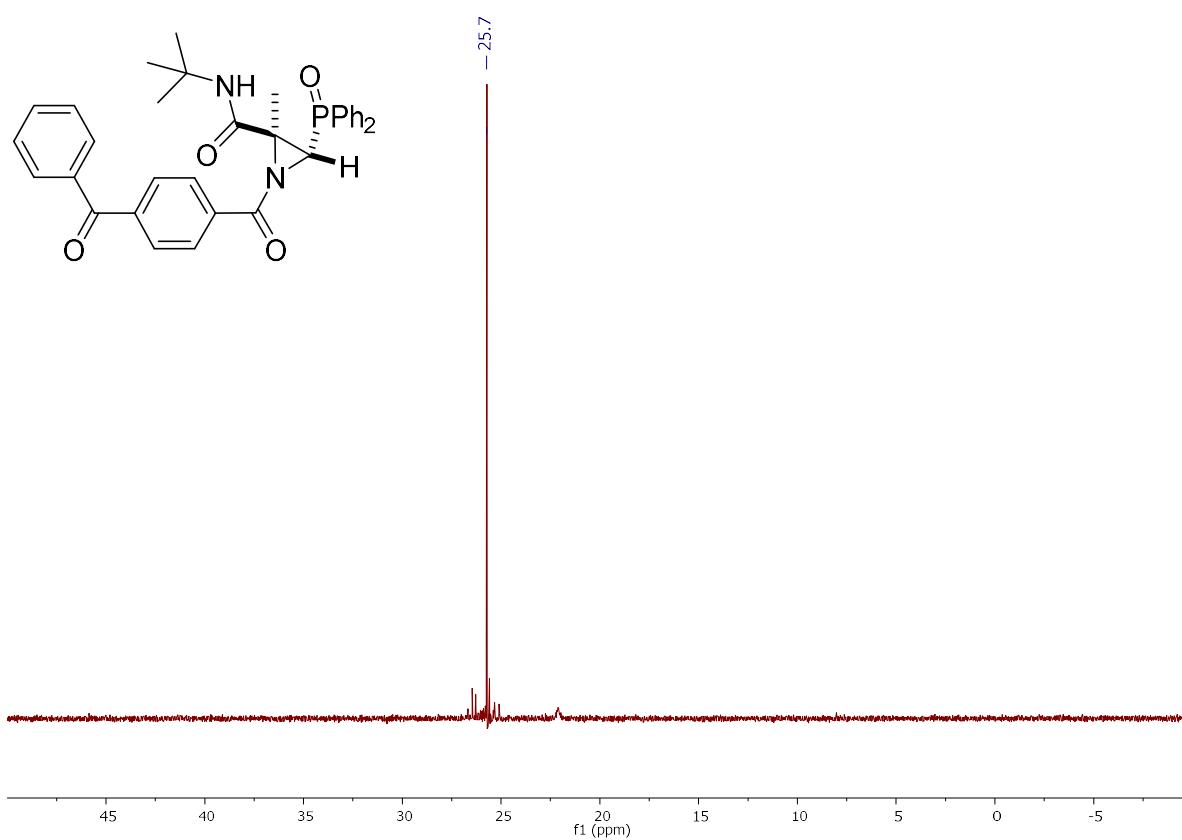

$^1\text{H}$  NMR (400 MHz,  $\text{CDCl}_3$ ) of *N*-Acylaziridine Phosphine Oxide **4o**

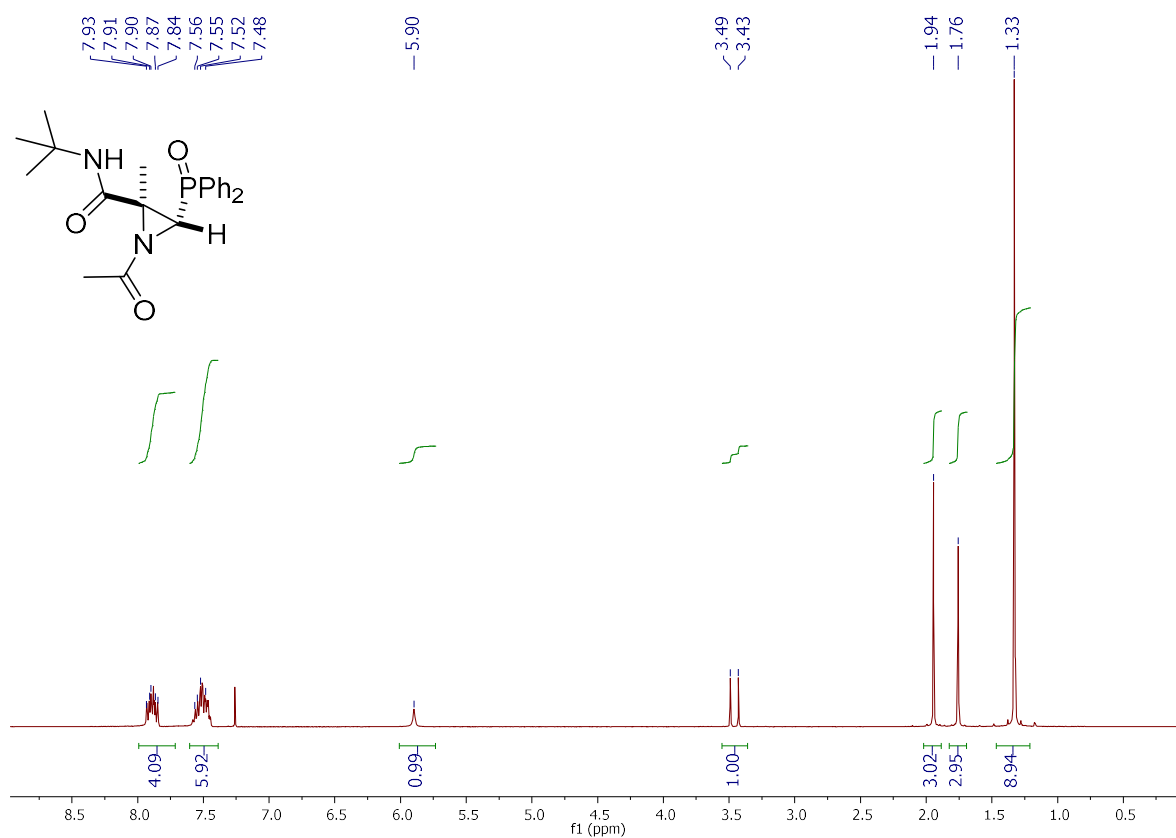

$^{13}\text{C}$   $\{^1\text{H}\}$  NMR (100 MHz,  $\text{CDCl}_3$ ) of *N*-Acylaziridine Phosphine Oxide **4o**

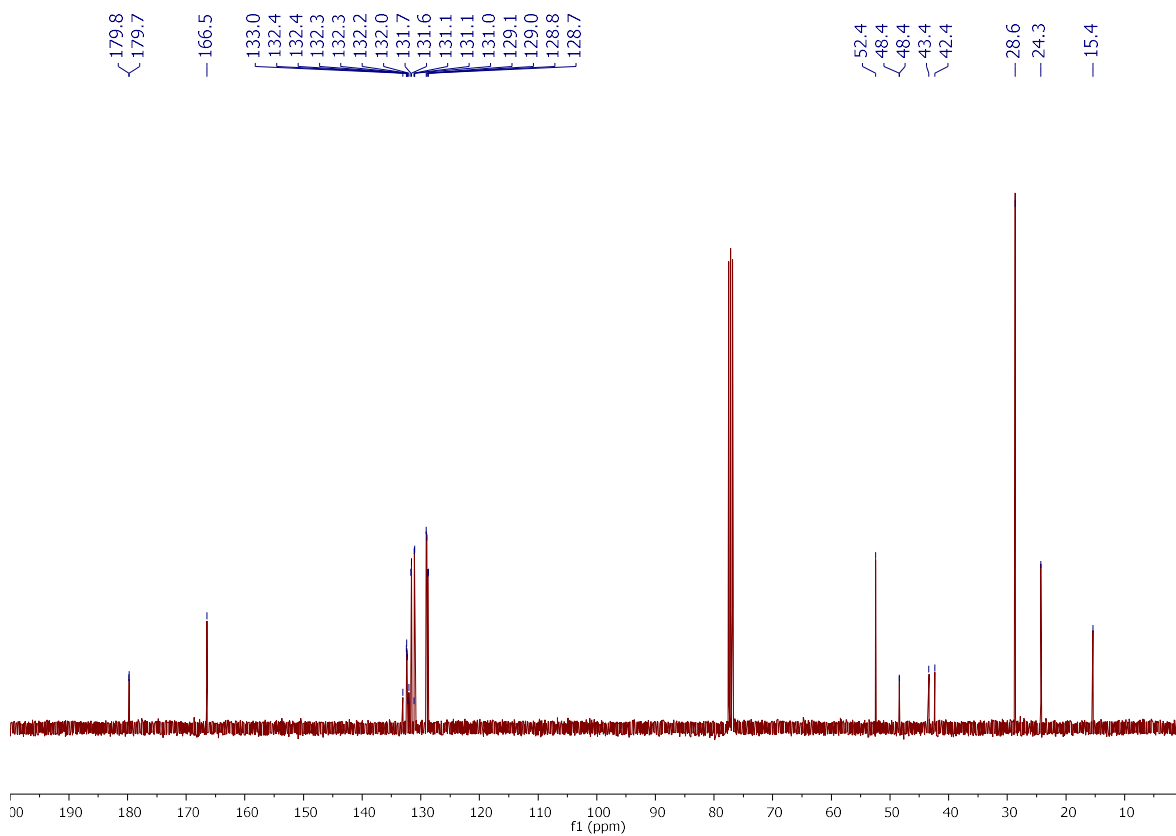

$^{31}\text{P}$  (160 MHz,  $\text{CDCl}_3$ ) of *N*-Acylaziridine Phosphine Oxide **4o**

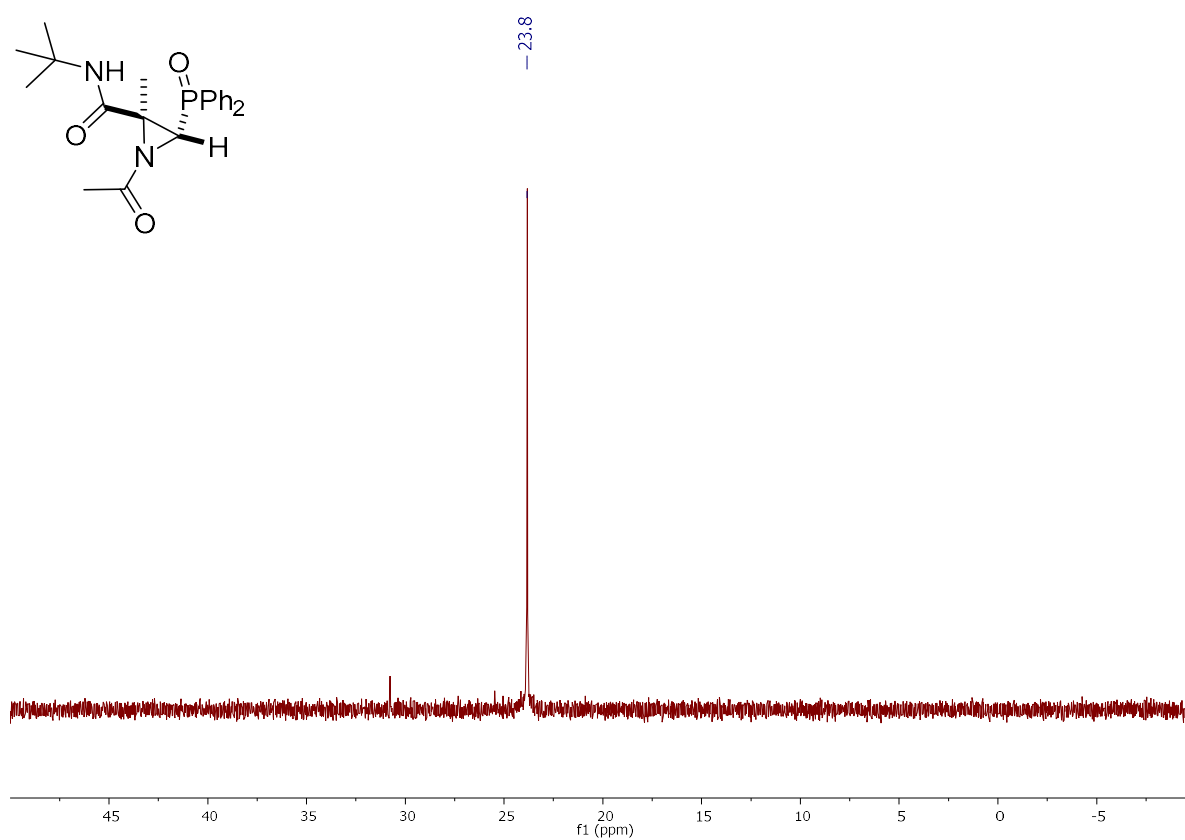

$^1\text{H}$  NMR (400 MHz,  $\text{CDCl}_3$ ) of *N*-Acylaziridine Phosphine Oxide **4p**

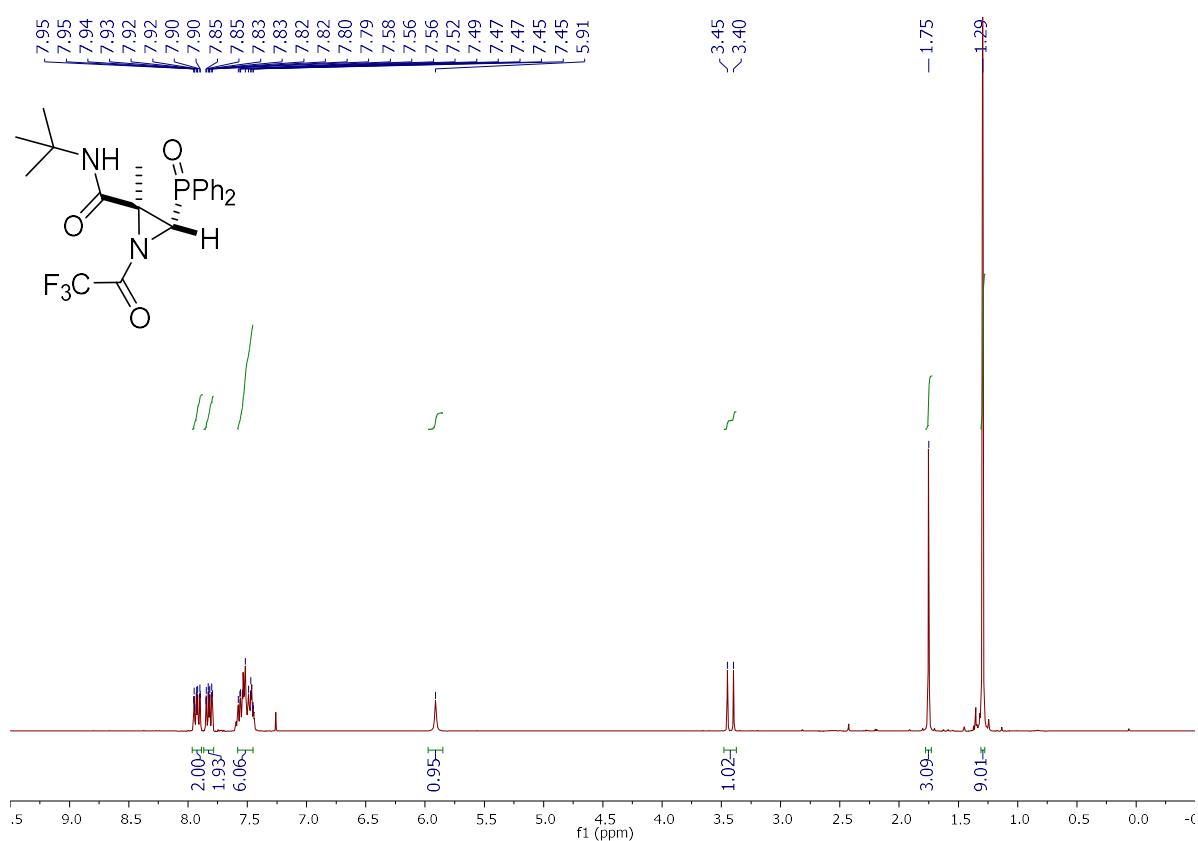

$^{13}\text{C}$   $\{^1\text{H}\}$  NMR (100 MHz,  $\text{CDCl}_3$ ) of *N*-Acylaziridine Phosphine Oxide **4p**

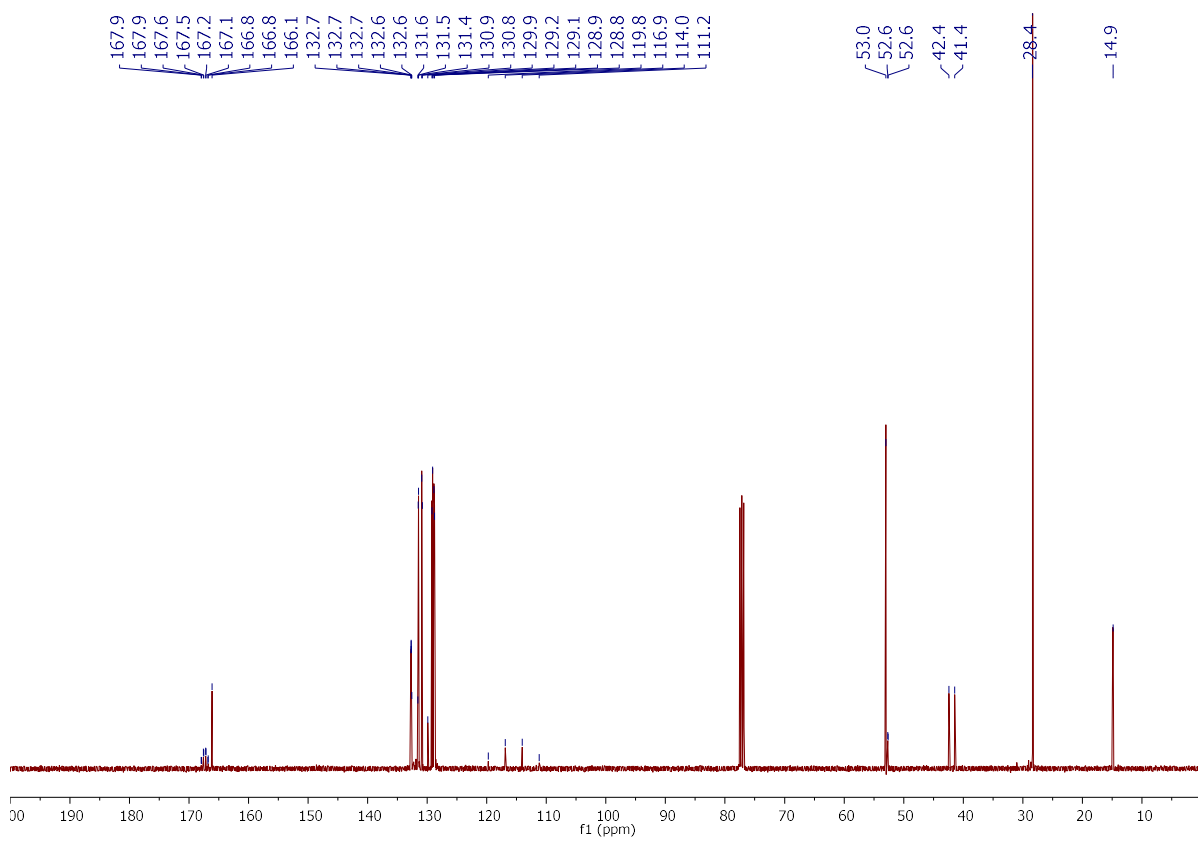



$^{31}\text{P}$  (160 MHz,  $\text{CDCl}_3$ ) of *N*-Acylaziridine Phosphine Oxide **4p**

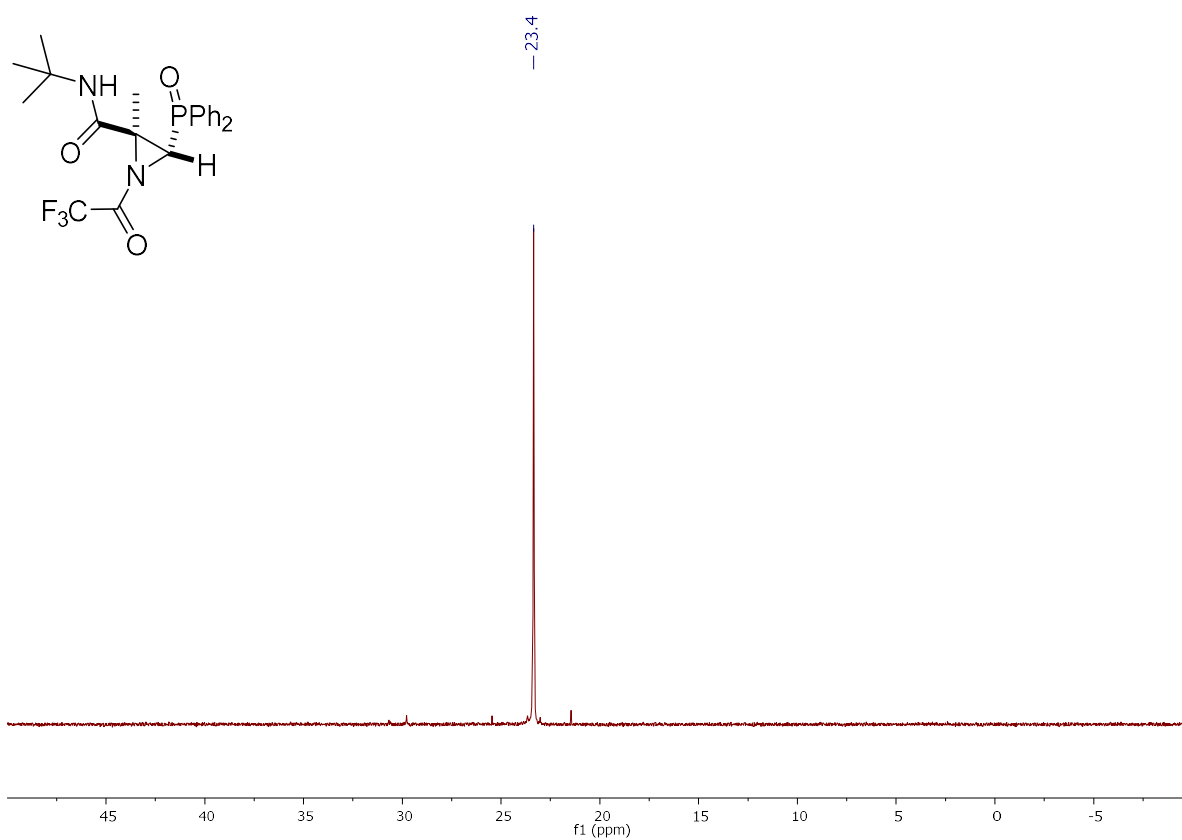

$^{19}\text{F}$  (376 MHz,  $\text{CDCl}_3$ ) of *N*-Acylaziridine Phosphine Oxide **4p**

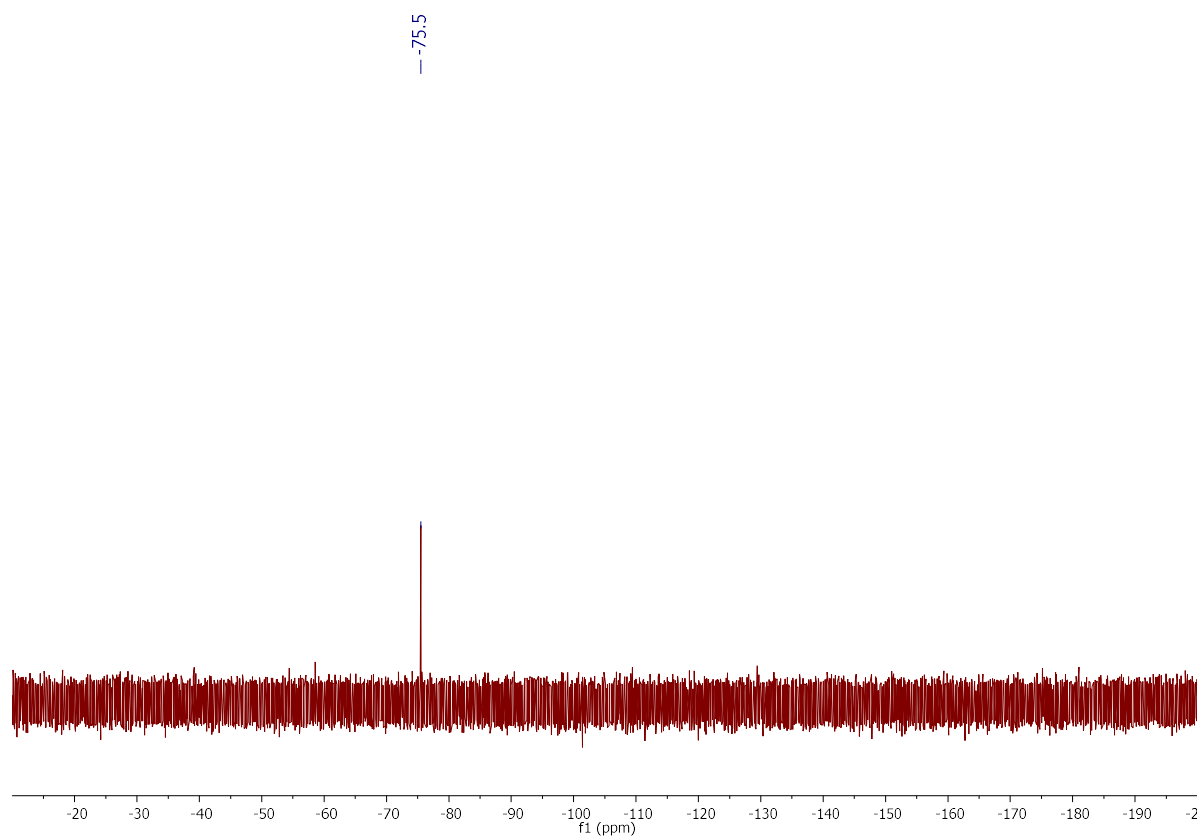

$^1\text{H}$  NMR (400 MHz,  $\text{CDCl}_3$ ) of *N*-Acylaziridine Phosphine Oxide **4q**

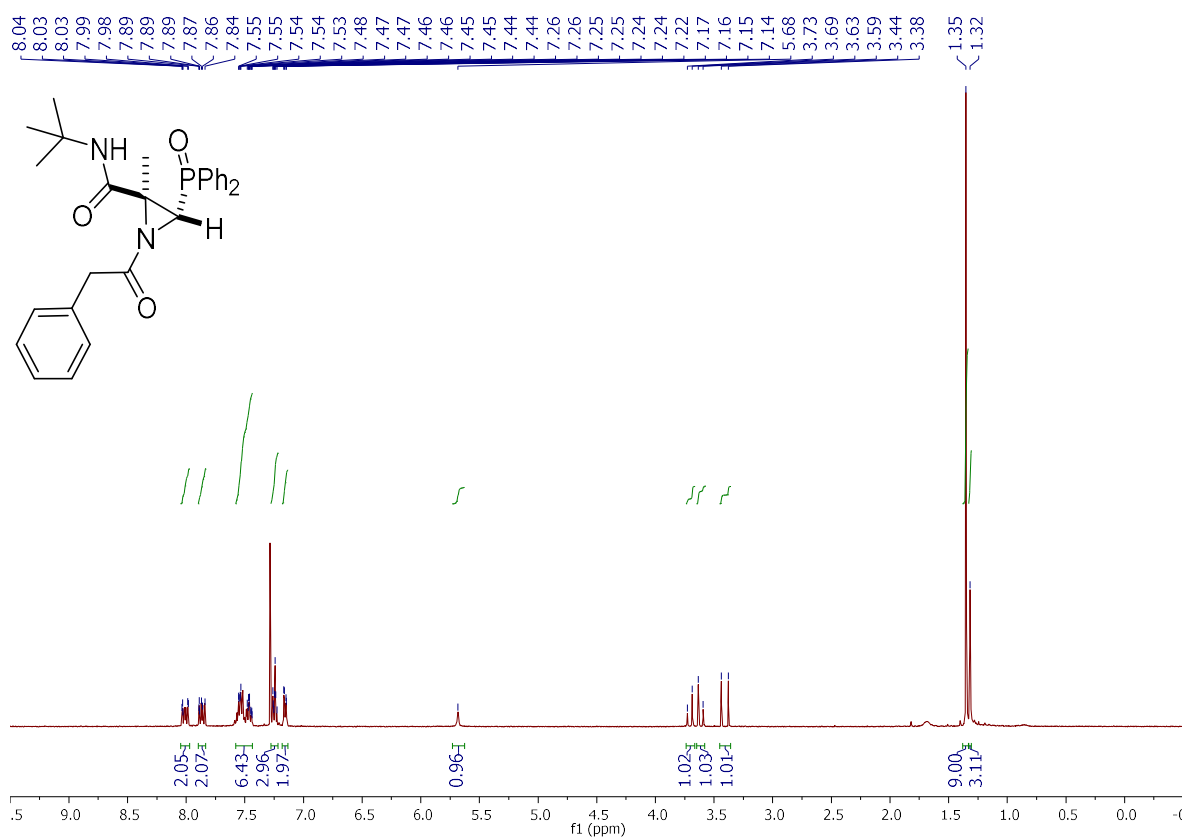

$^{13}\text{C}$   $\{^1\text{H}\}$  NMR (100 MHz,  $\text{CDCl}_3$ ) of *N*-Acylaziridine Phosphine Oxide **4q**

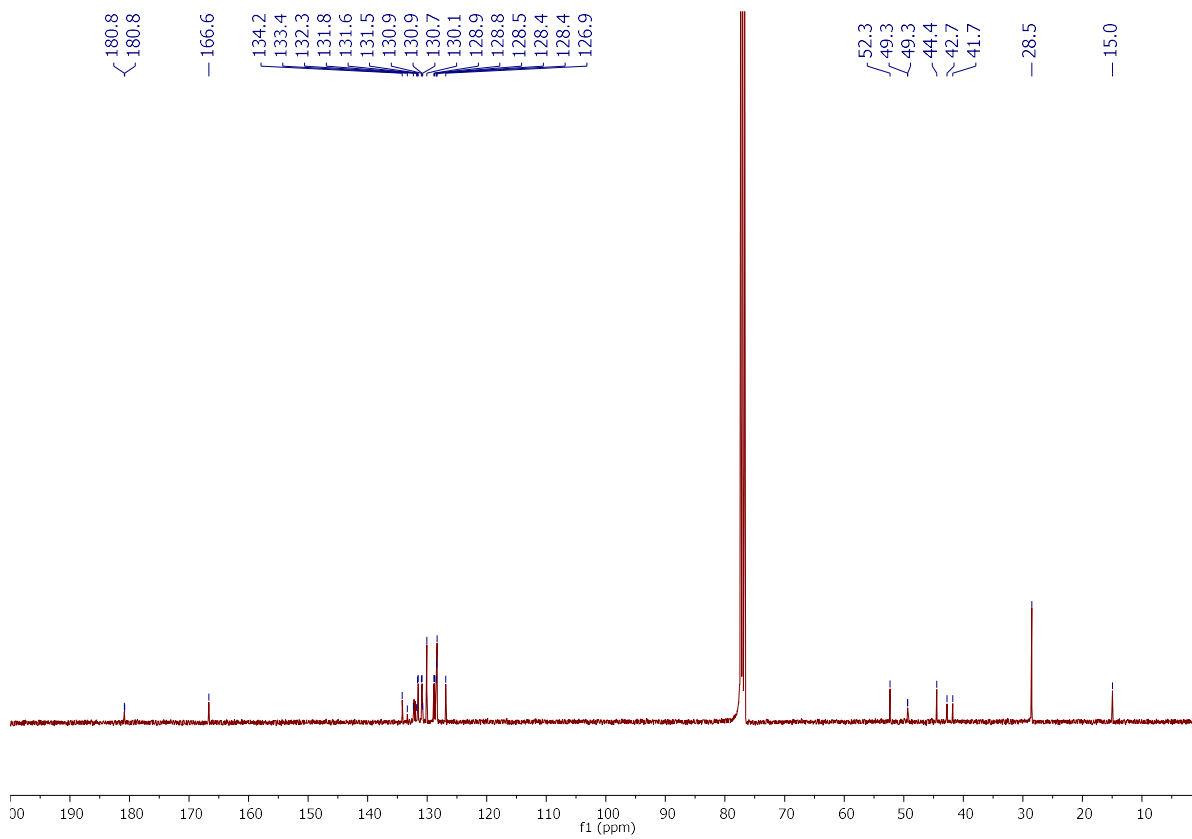

$^{31}\text{P}$  (160 MHz,  $\text{CDCl}_3$ ) of *N*-Acylaziridine Phosphine Oxide **4q**

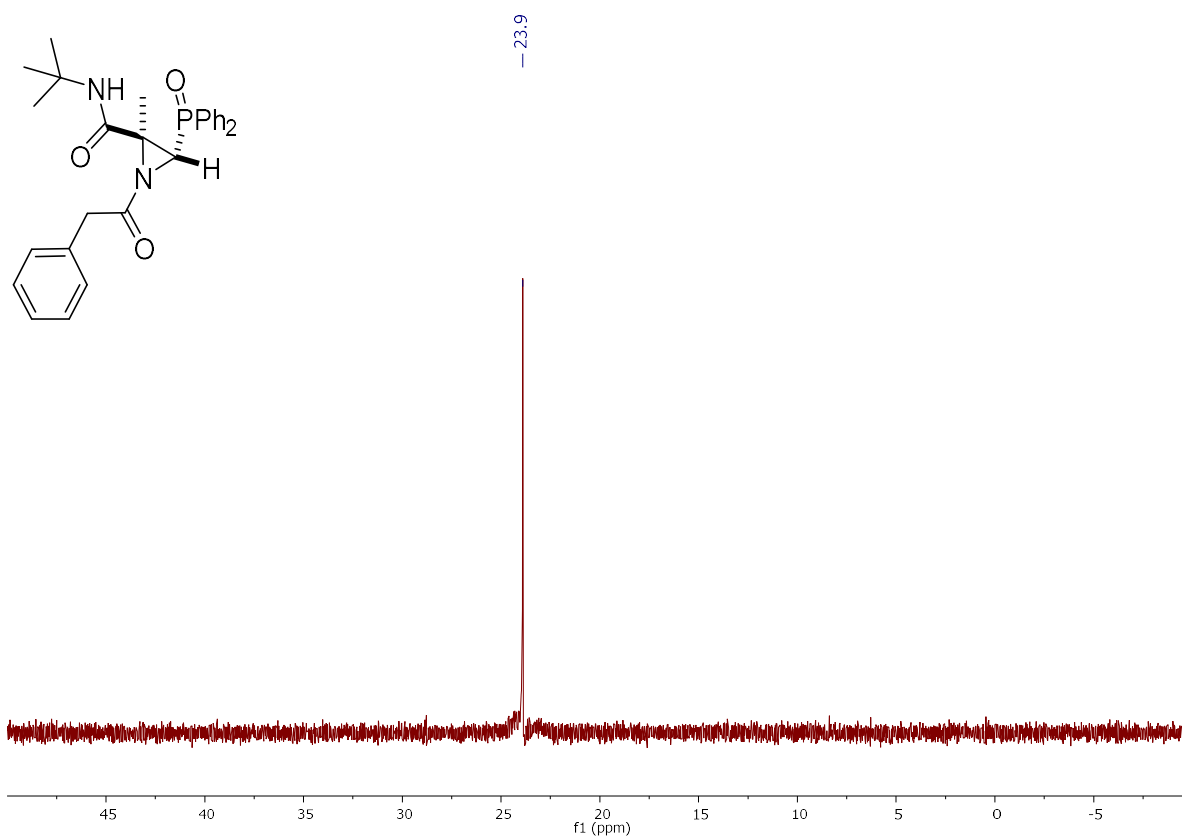

$^1\text{H}$  NMR (400 MHz,  $\text{CDCl}_3$ ) of *N*-Acylaziridine Phosphine Oxide **4r**

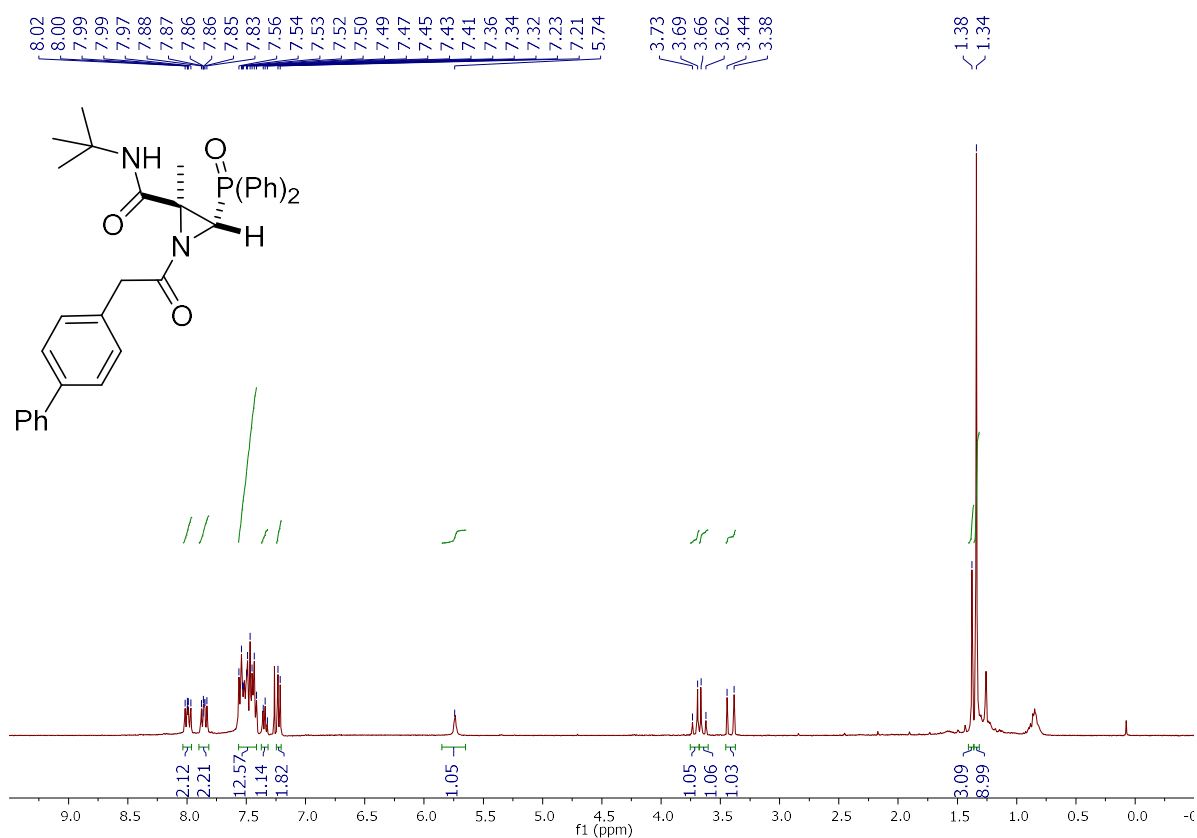

$^{13}\text{C}$   $\{^1\text{H}\}$  NMR (100 MHz,  $\text{CDCl}_3$ ) of *N*-Acylaziridine Phosphine Oxide **4r**

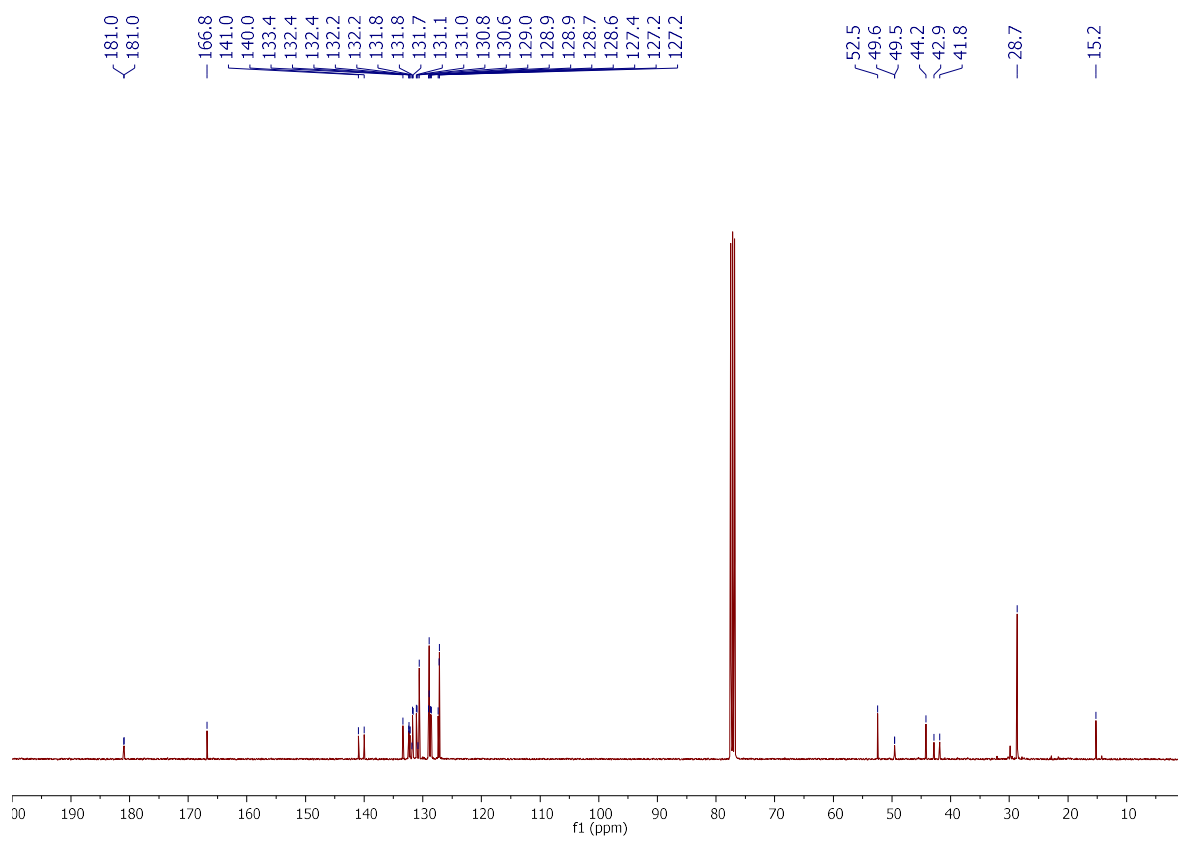

$^{31}\text{P}$  (160 MHz,  $\text{CDCl}_3$ ) of *N*-Acylaziridine Phosphine Oxide **4r**

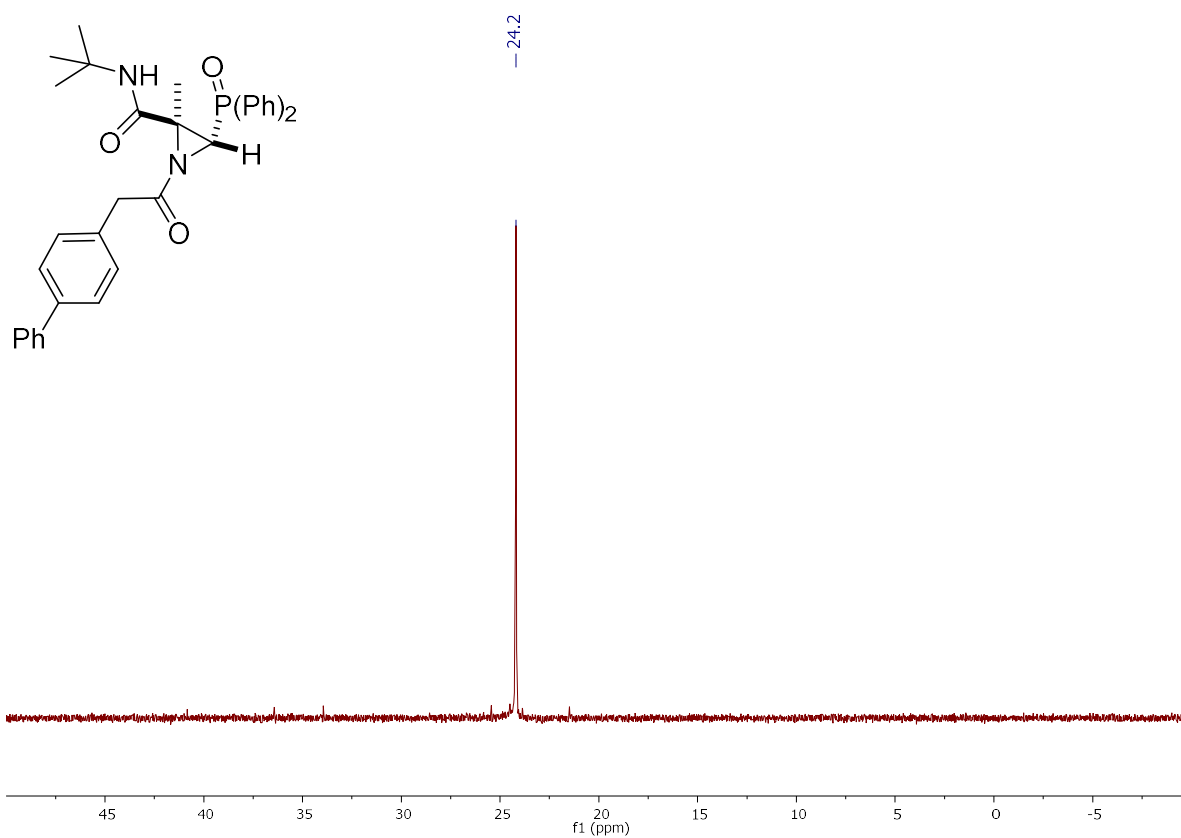

$^1\text{H}$  NMR (400 MHz,  $\text{CDCl}_3$ ) of *N*-Acylaziridine Phosphine Oxide **4s**

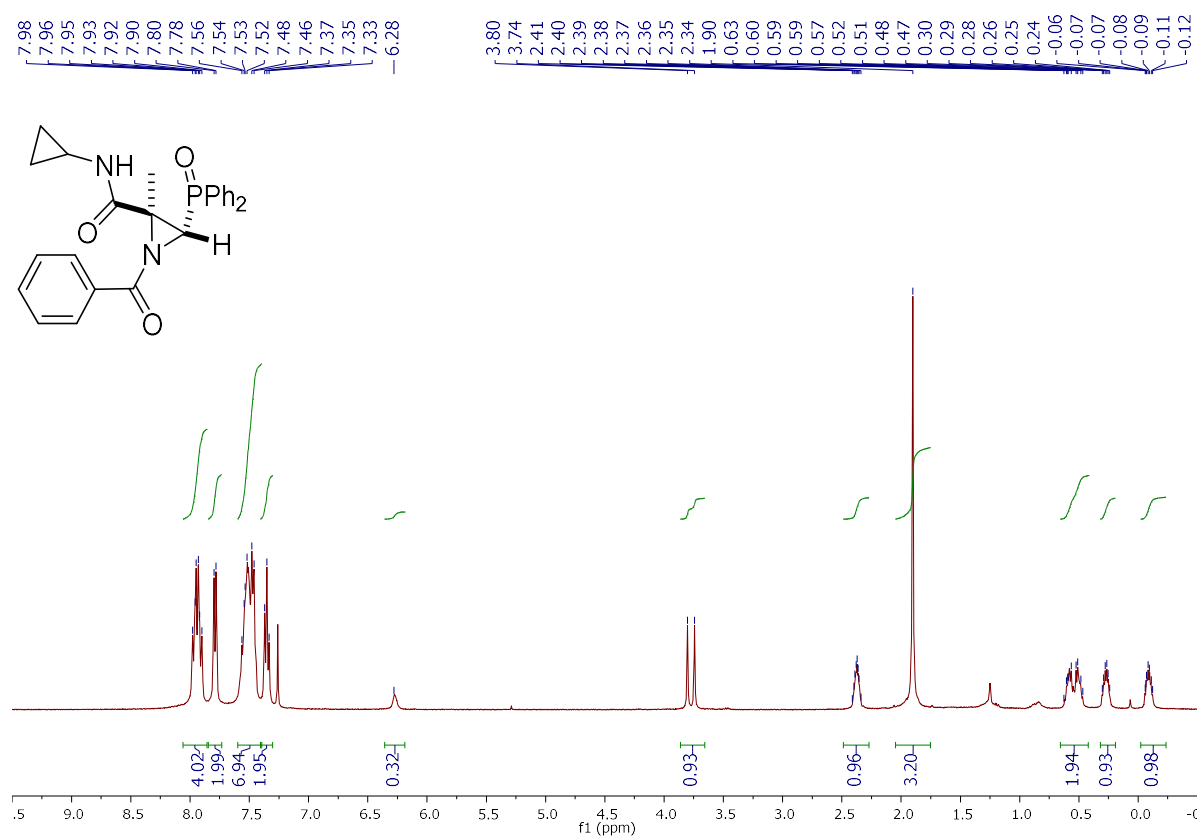

$^{13}\text{C}$  { $^1\text{H}$ } NMR (100 MHz,  $\text{CDCl}_3$ ) of *N*-Acylaziridine Phosphine Oxide **4s**

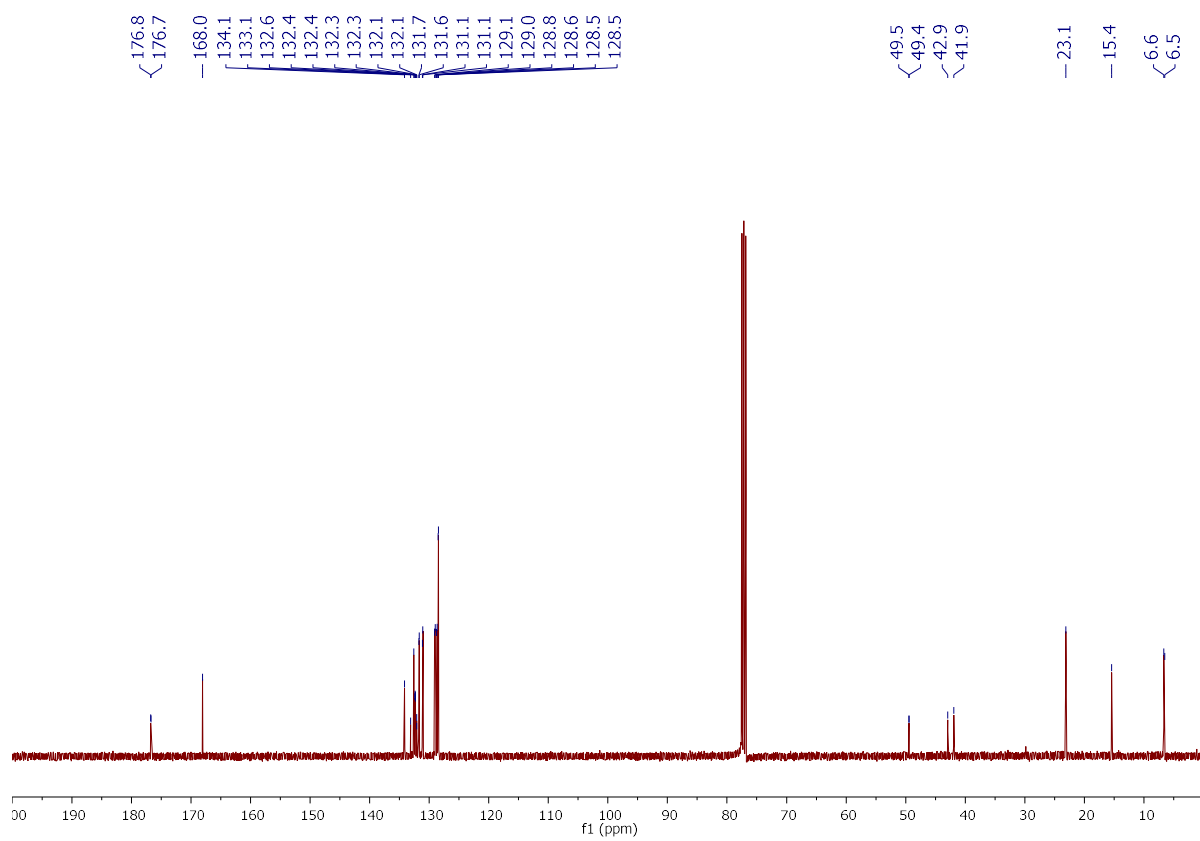

$^{31}\text{P}$  (160 MHz,  $\text{CDCl}_3$ ) of *N*-Acylaziridine Phosphine Oxide **4s**

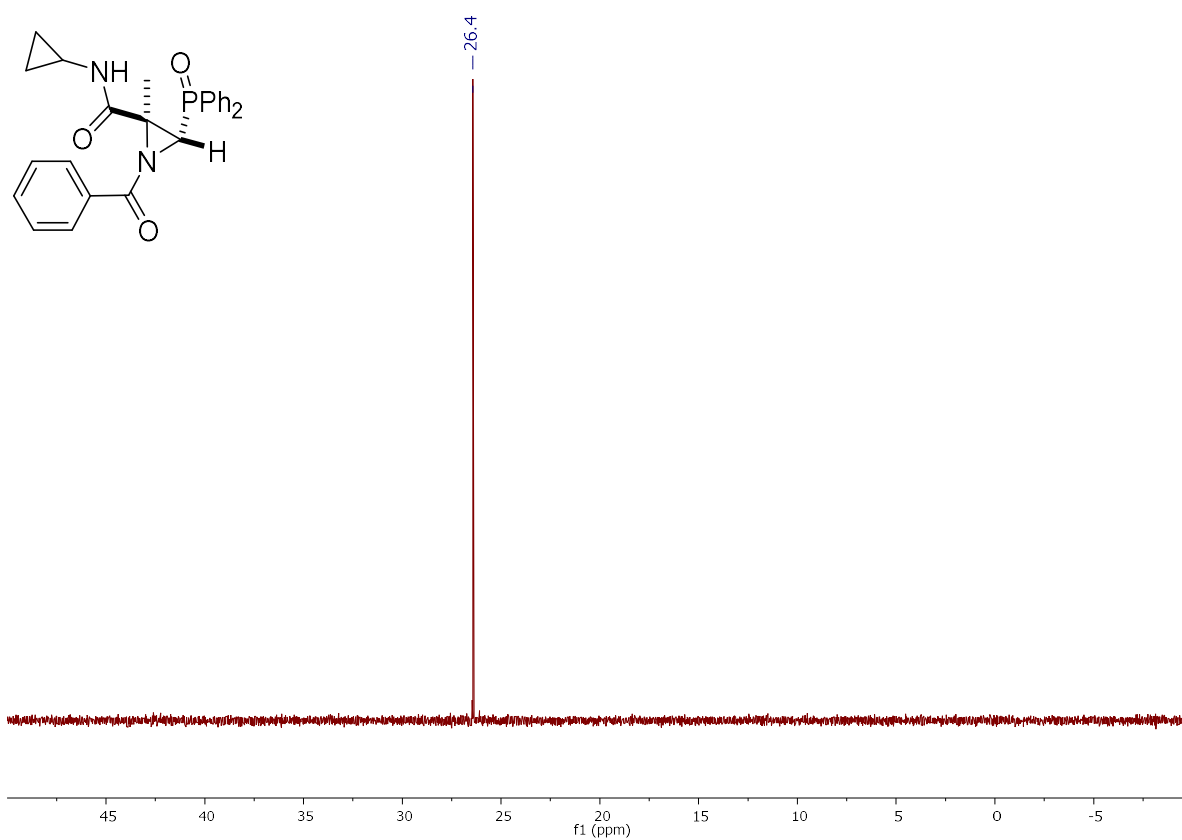

$^1\text{H}$  NMR (400 MHz,  $\text{CDCl}_3$ ) of *N*-Acylaziridine Phosphine Oxide **4t**

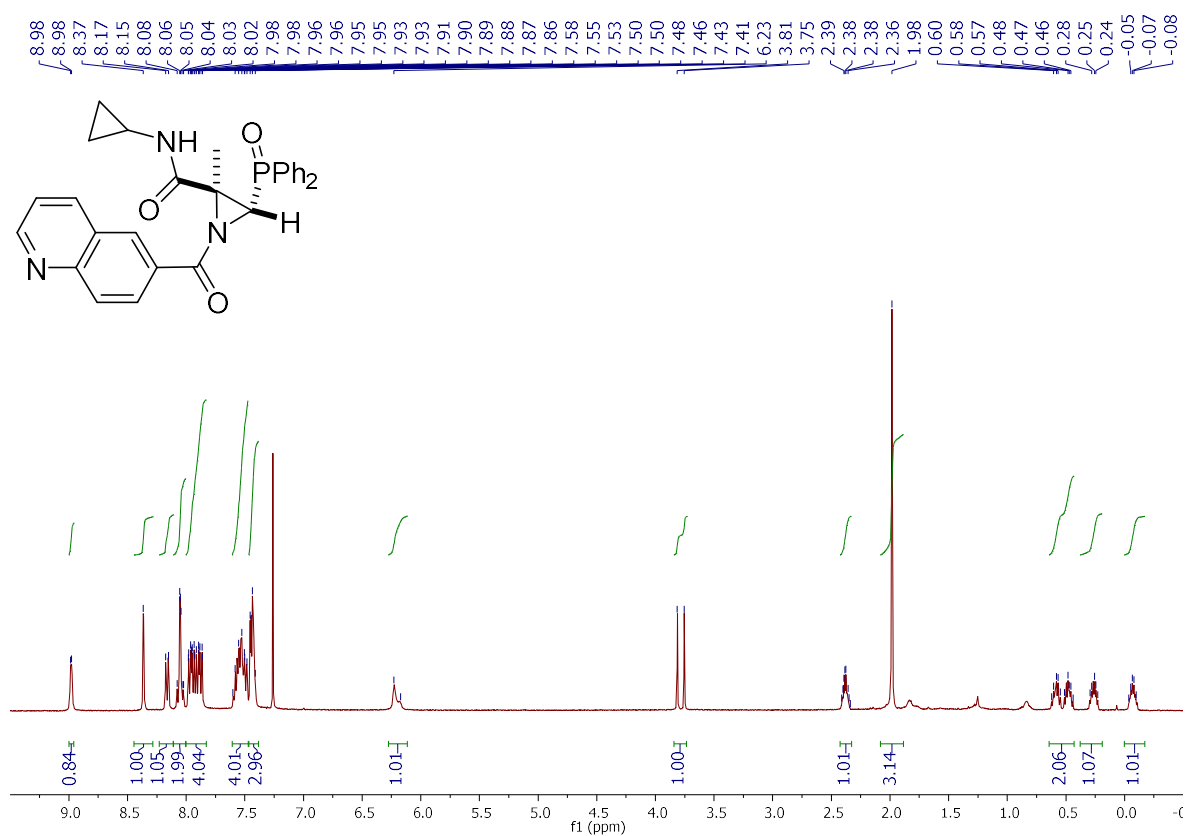

$^{13}\text{C}$  { $^1\text{H}$ } NMR (100 MHz,  $\text{CDCl}_3$ ) of *N*-Acylaziridine Phosphine Oxide **4t**

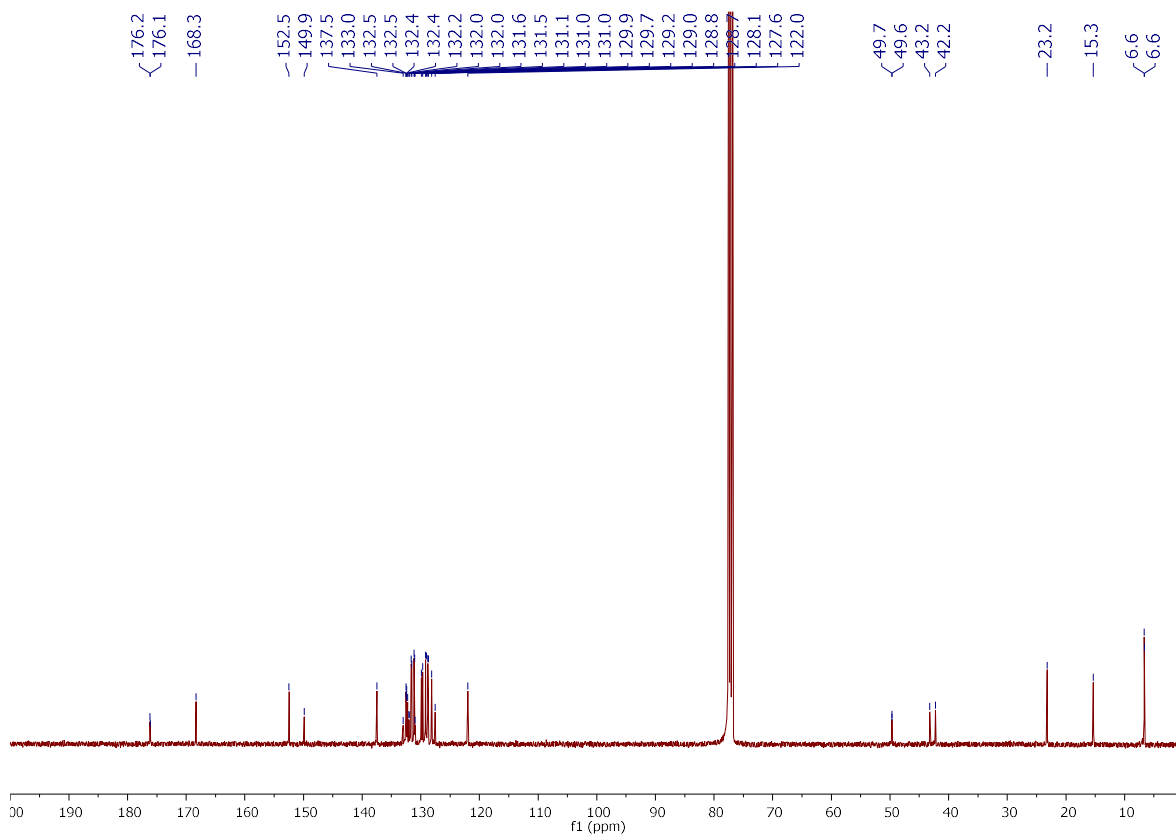



$^{31}\text{P}$  (160 MHz,  $\text{CDCl}_3$ ) of *N*-Acylaziridine Phosphine Oxide **4t**

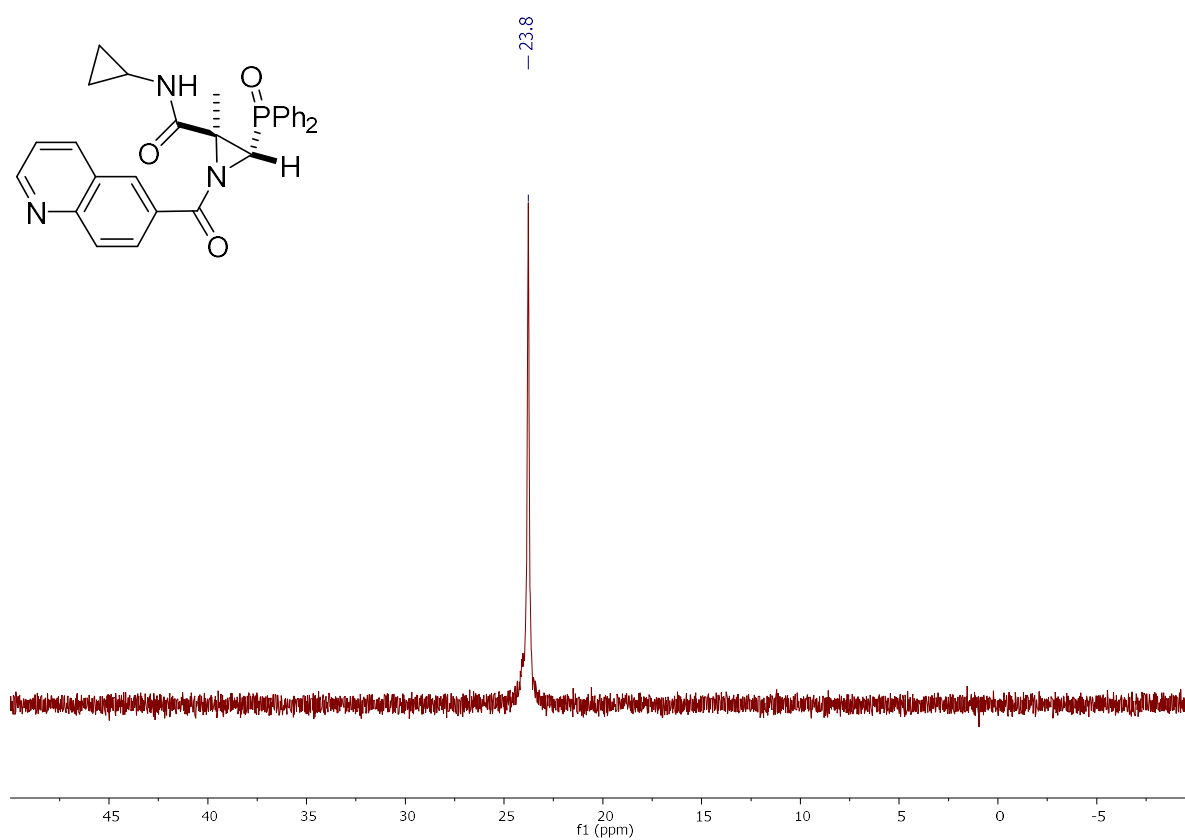

$^1\text{H}$  NMR (400 MHz,  $\text{CDCl}_3$ ) of *N*-Acylaziridine Phosphine Oxide **4u**

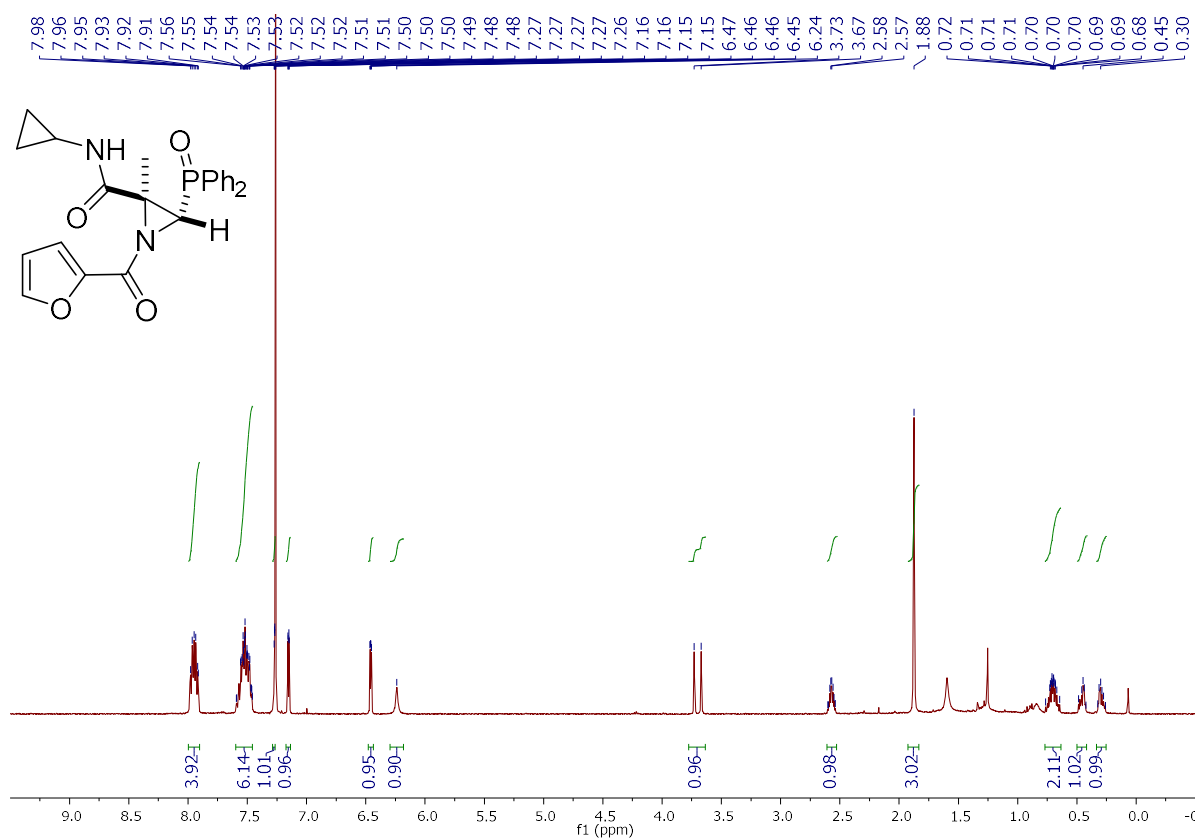

$^{13}\text{C}$  { $^1\text{H}$ } NMR (100 MHz,  $\text{CDCl}_3$ ) of *N*-Acylaziridine Phosphine Oxide **4u**

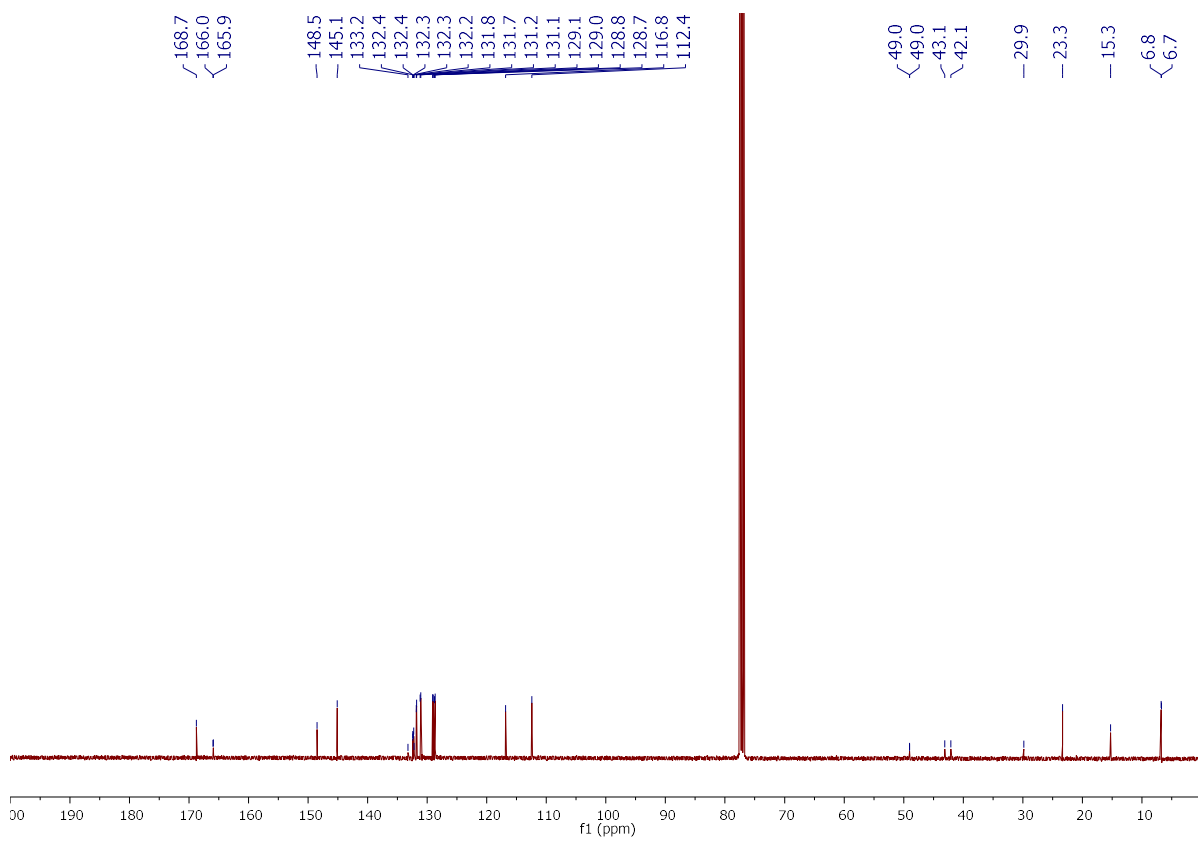

$^{31}\text{P}$  (160 MHz,  $\text{CDCl}_3$ ) of *N*-Acylaziridine Phosphine Oxide **4u**

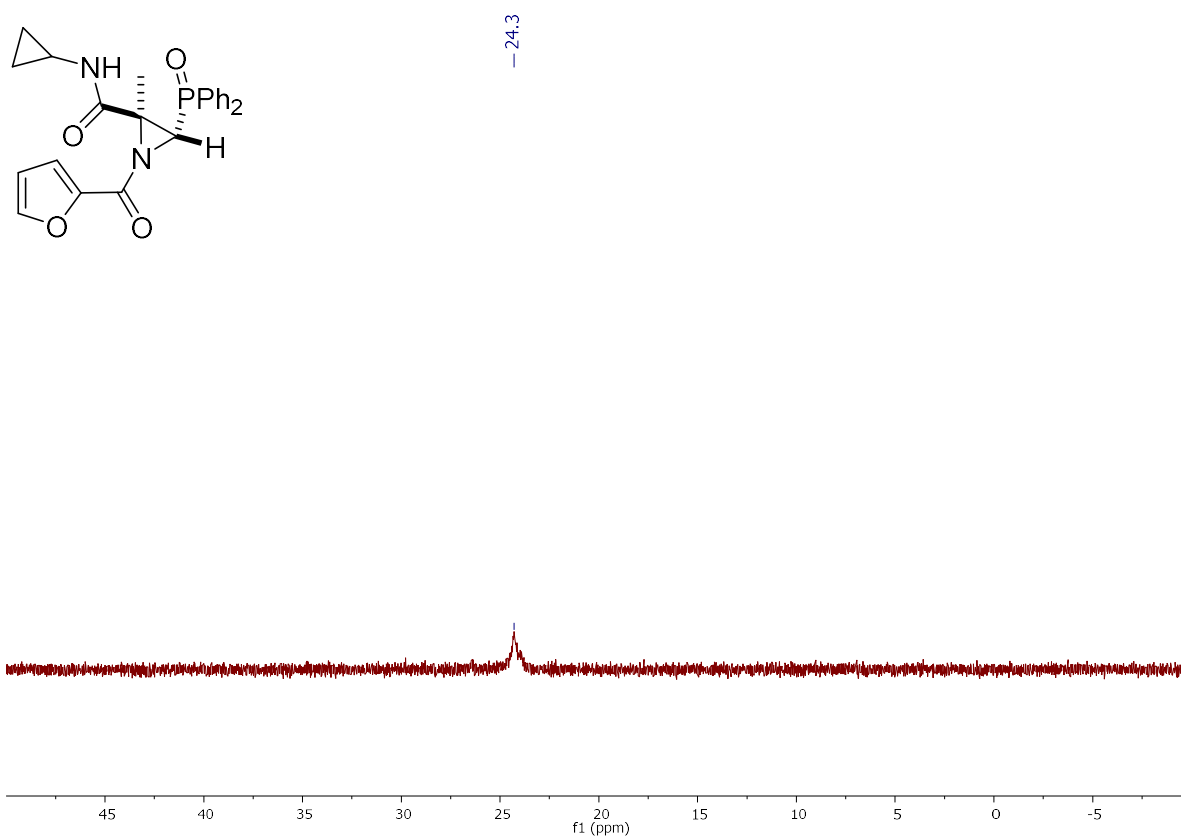

$^1\text{H}$  NMR (400 MHz,  $\text{CDCl}_3$ ) of *N*-Acylaziridine Phosphonate **5a**

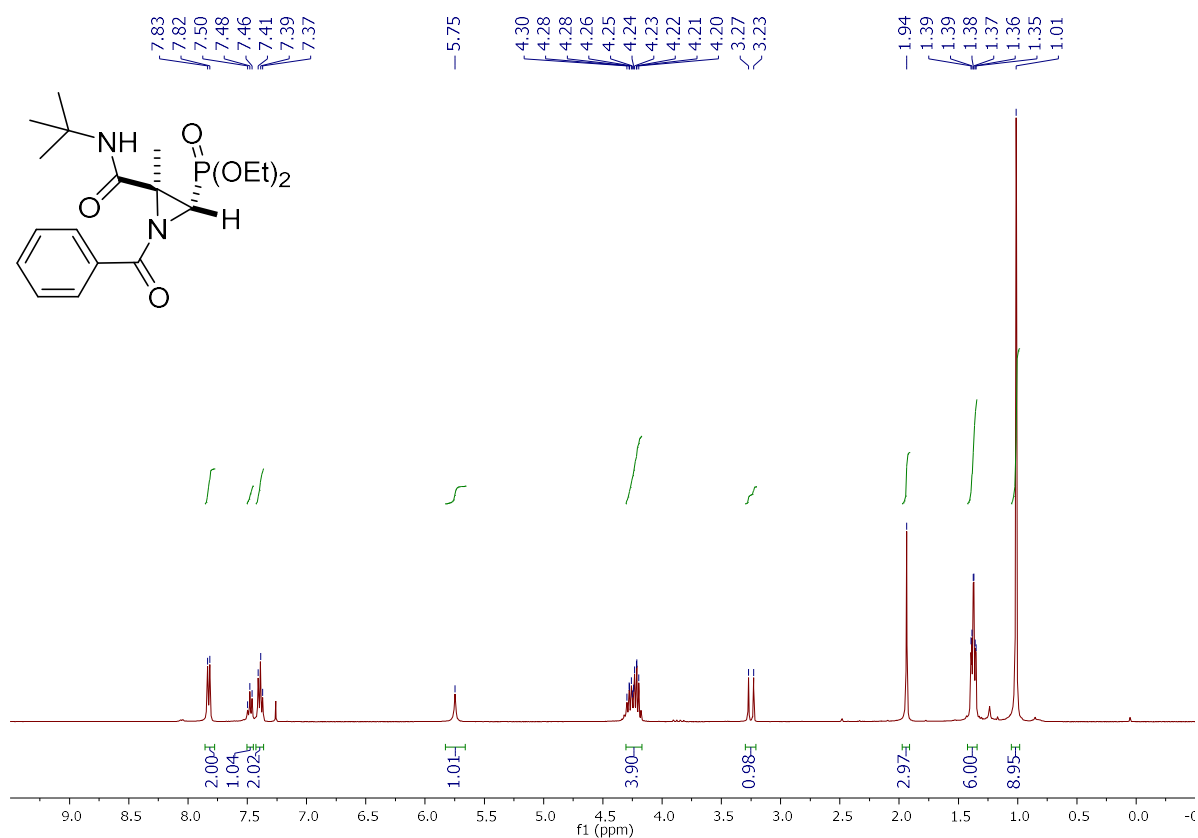

$^{13}\text{C}$  { $^1\text{H}$ } NMR (100 MHz,  $\text{CDCl}_3$ ) of *N*-Acylaziridine Phosphonate **5a**

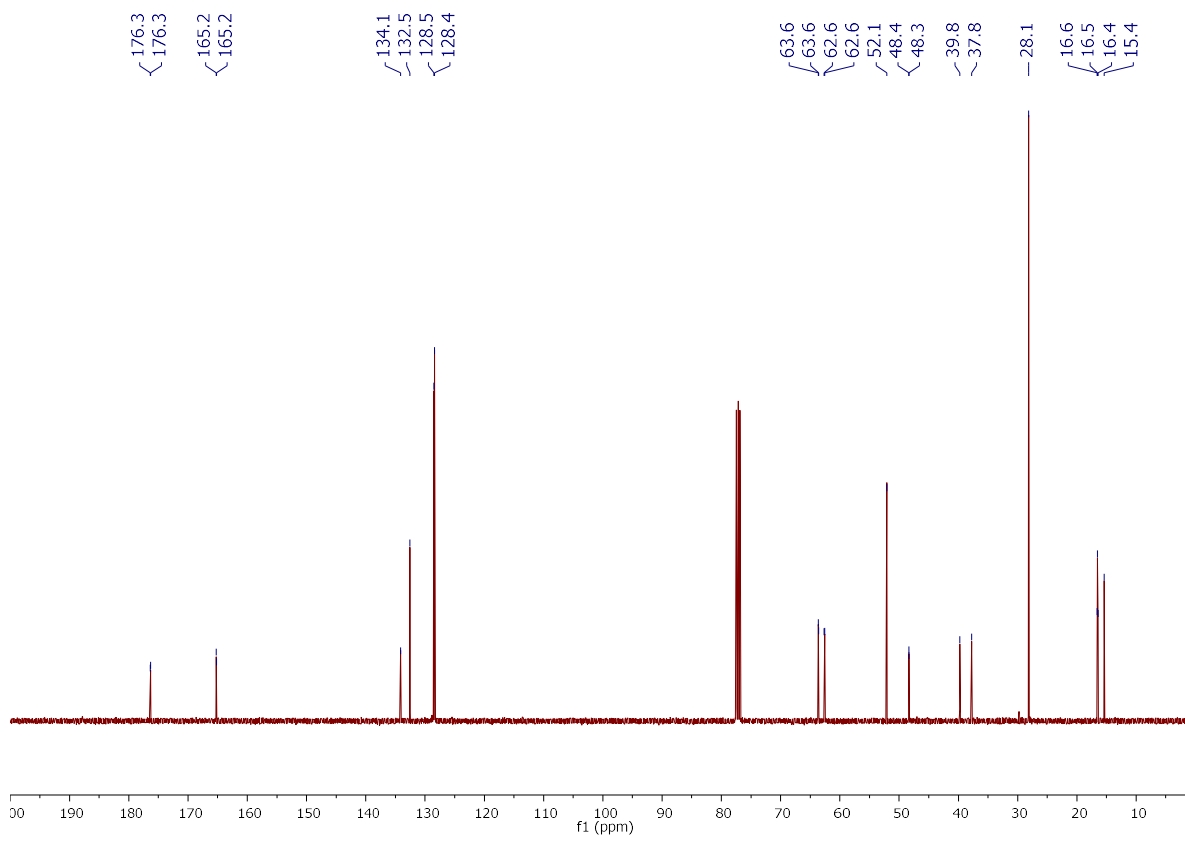

$^{31}\text{P}$  (160 MHz,  $\text{CDCl}_3$ ) of *N*-Acylaziridine Phosphonate **5a**

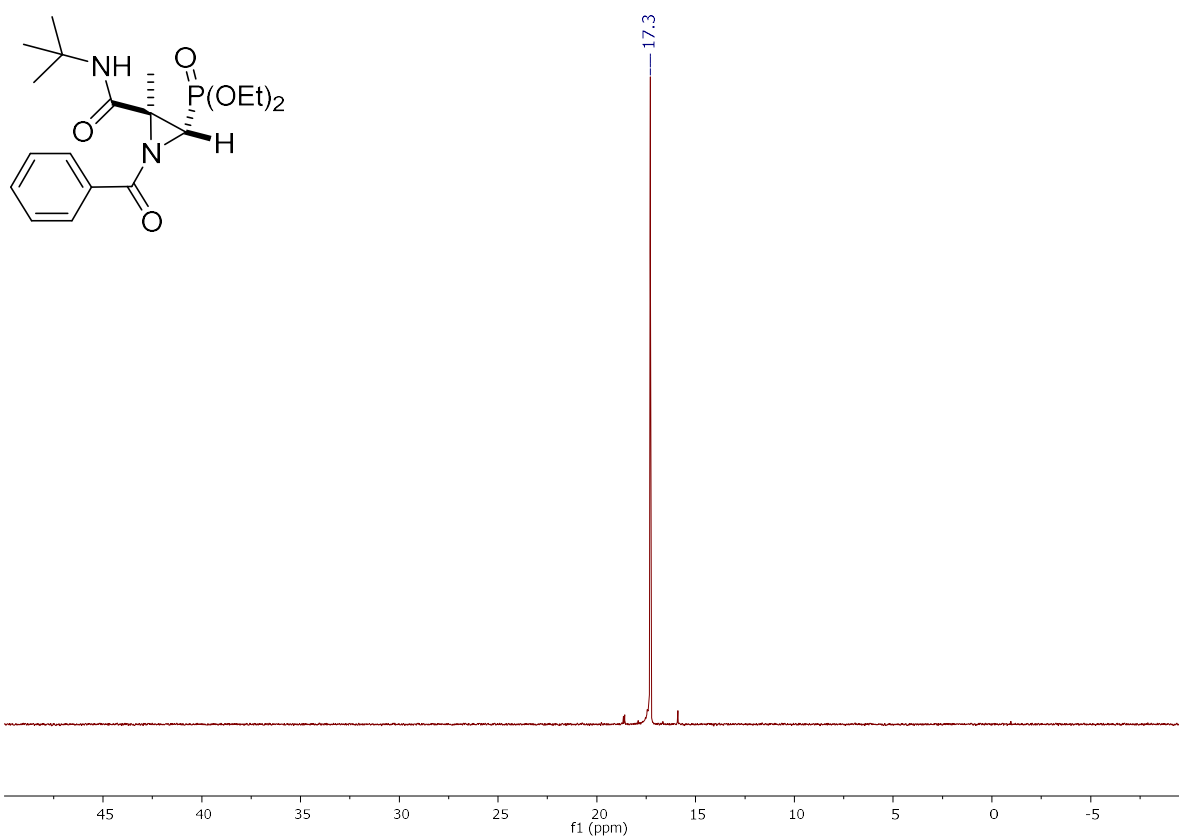

$^1\text{H}$  NMR (400 MHz,  $\text{CDCl}_3$ ) of *N*-Acylaziridine Phosphonate **5b**

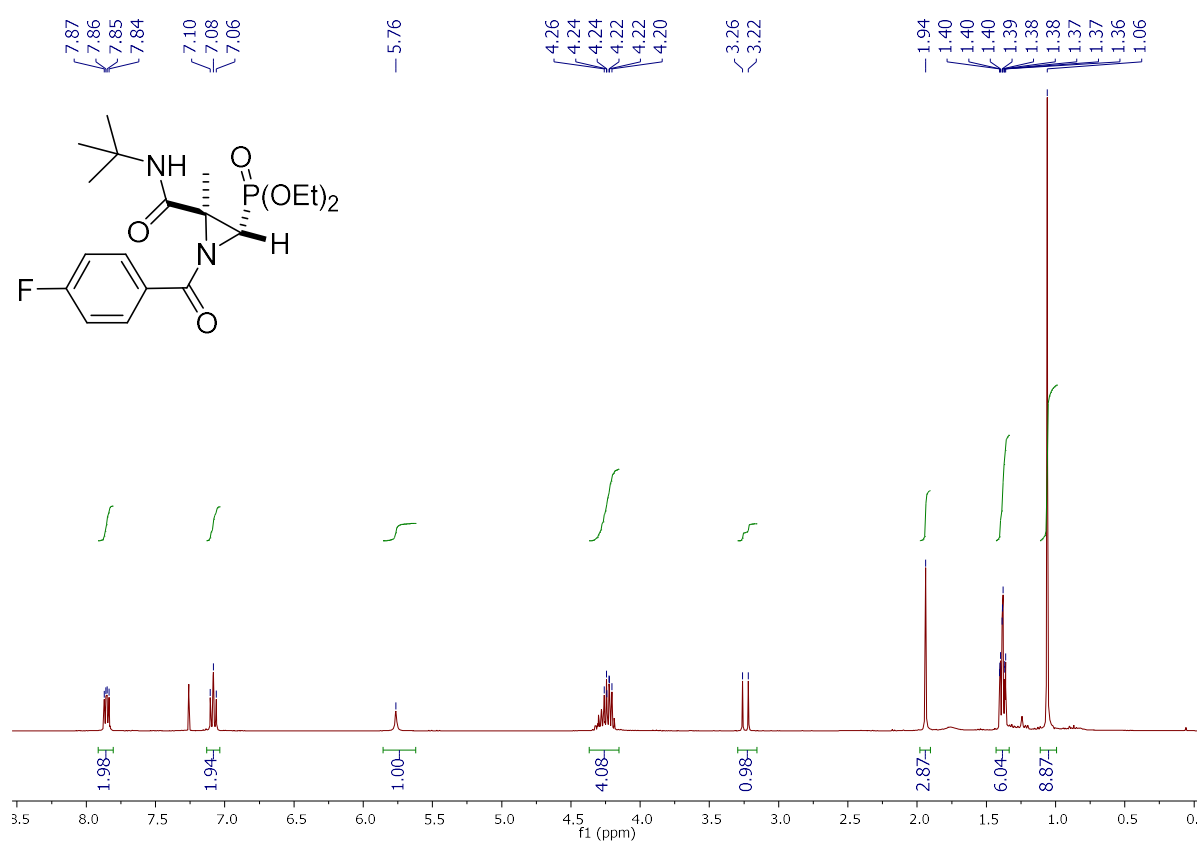

$^{13}\text{C}$  { $^1\text{H}$ } NMR (100 MHz,  $\text{CDCl}_3$ ) of *N*-Acylaziridine Phosphonate **5b**

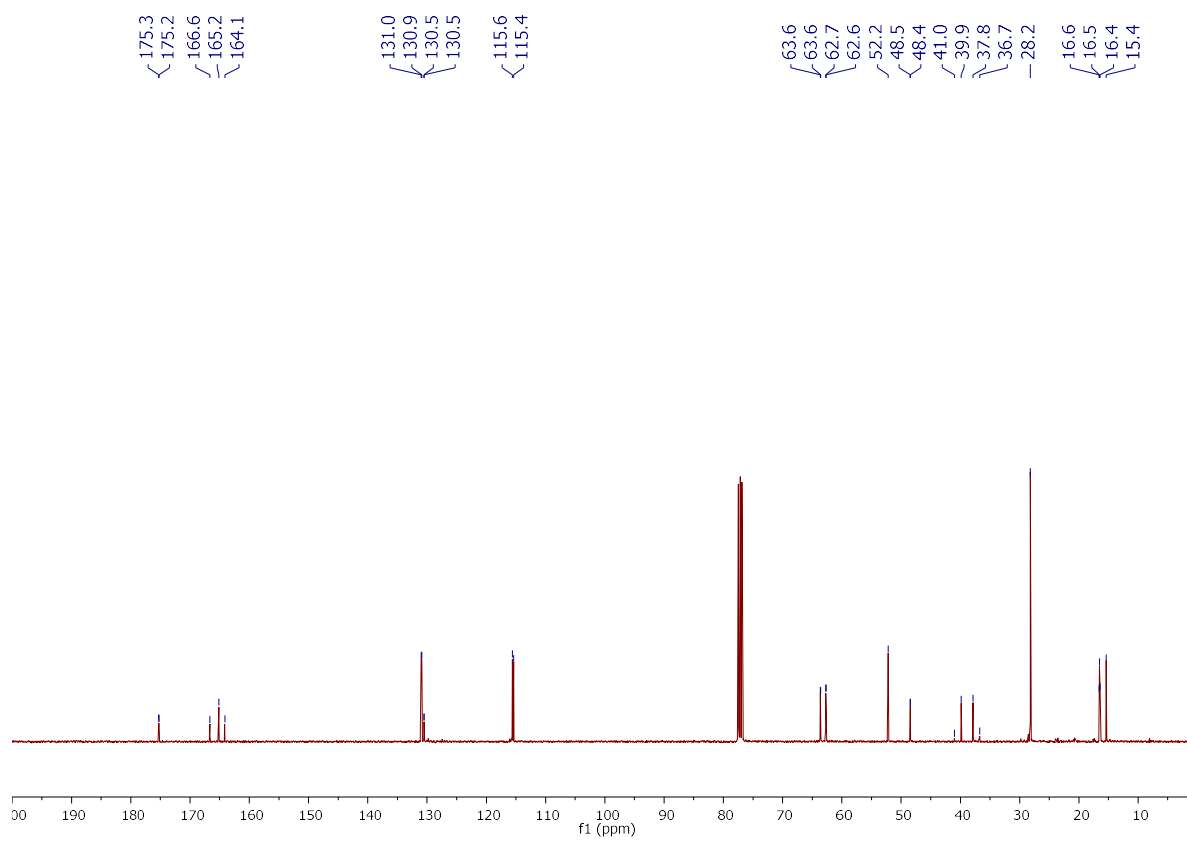

$^{31}\text{P}$  (160 MHz,  $\text{CDCl}_3$ ) of *N*-Acylaziridine Phosphonate **5b**

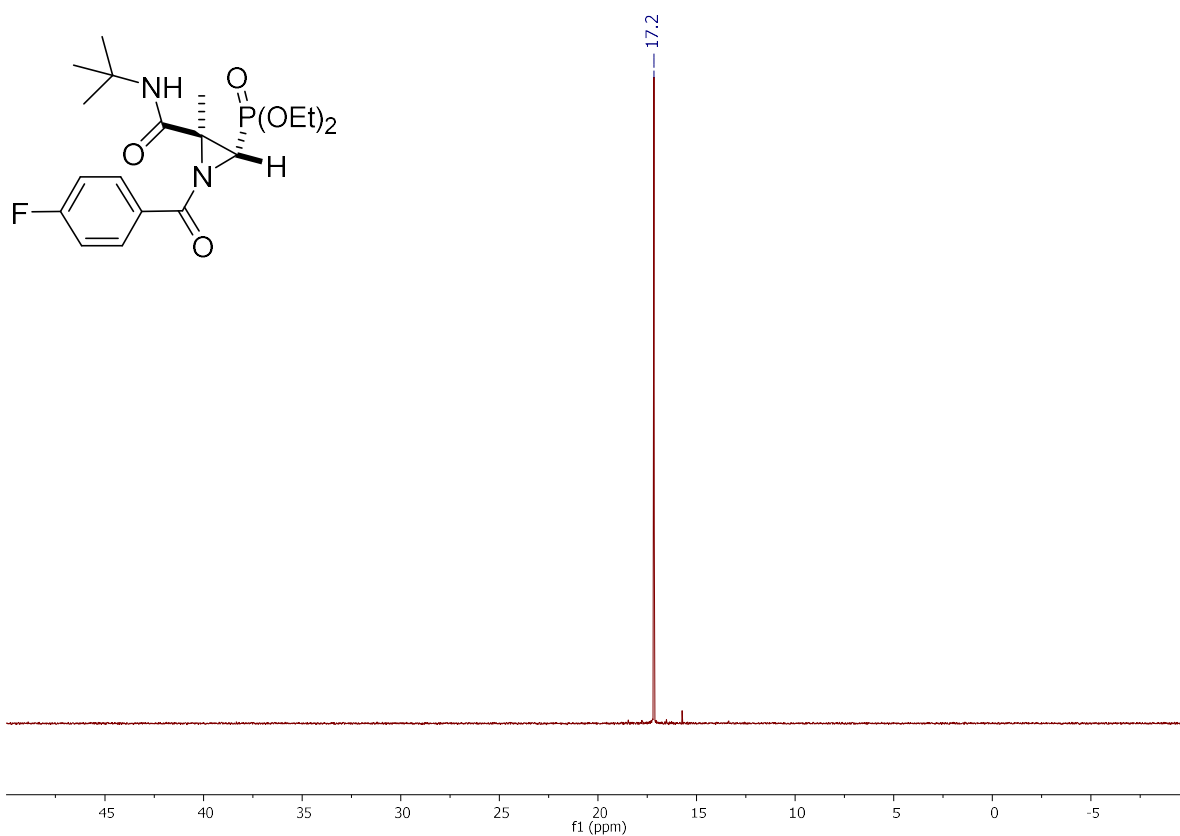

$^{19}\text{F}$  (376 MHz,  $\text{CDCl}_3$ ) of *N*-Acylaziridine Phosphonate **5b**

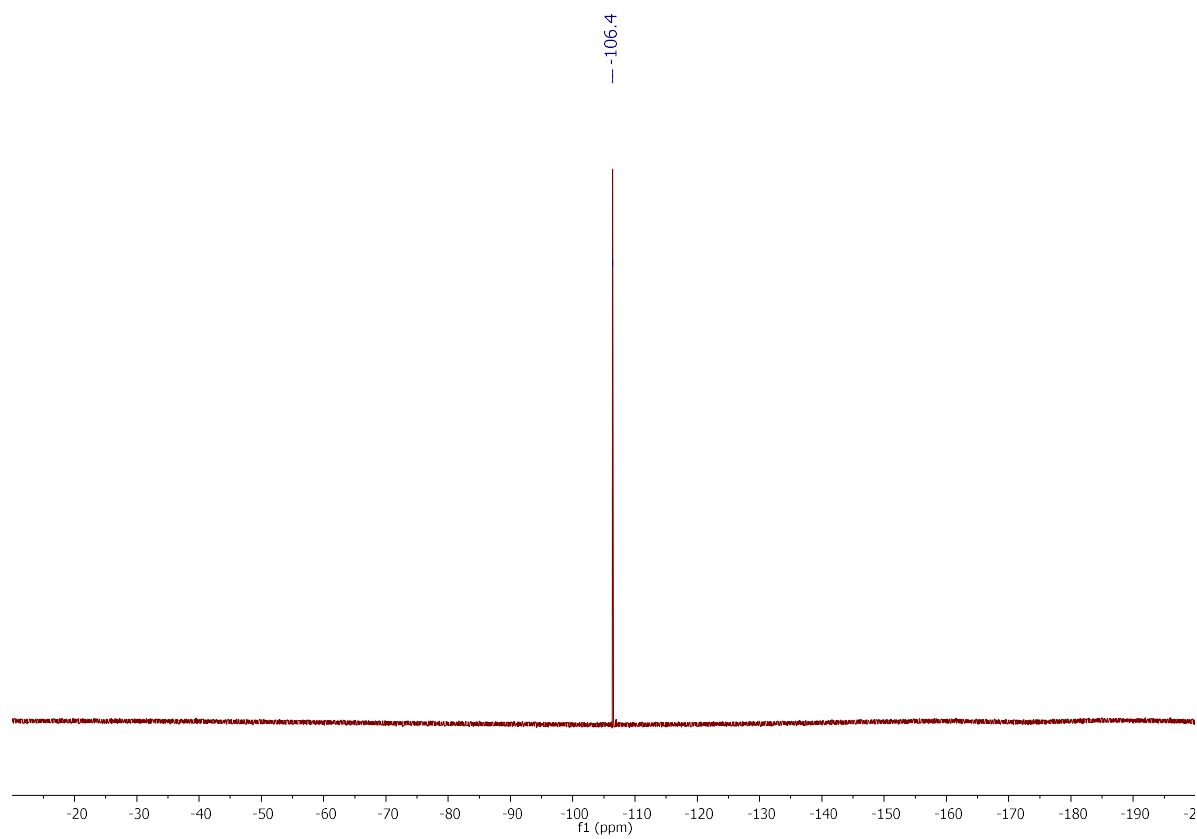

$^1\text{H}$  NMR (400 MHz,  $\text{CDCl}_3$ ) of *N*-Acylaziridine Phosphonate **5c**

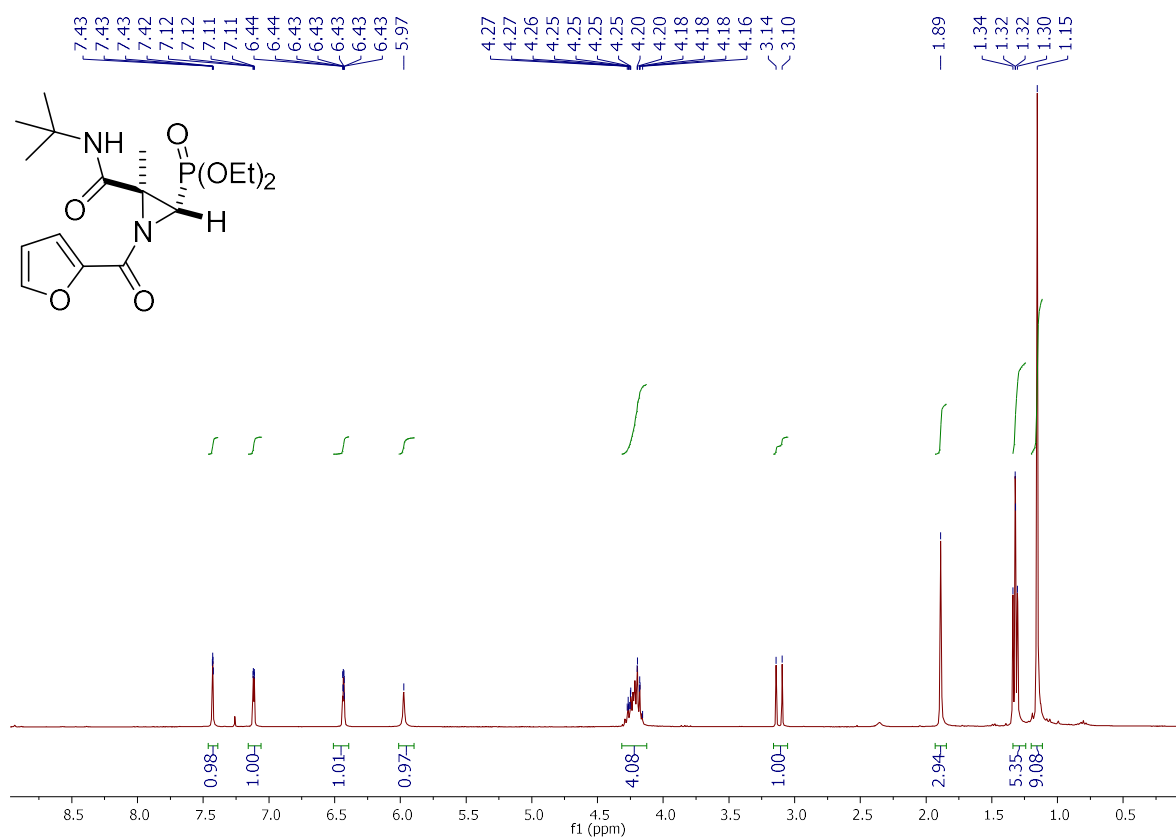

$^{13}\text{C}$   $\{^1\text{H}\}$  NMR (100 MHz,  $\text{CDCl}_3$ ) of *N*-Acylaziridine Phosphonate **5c**

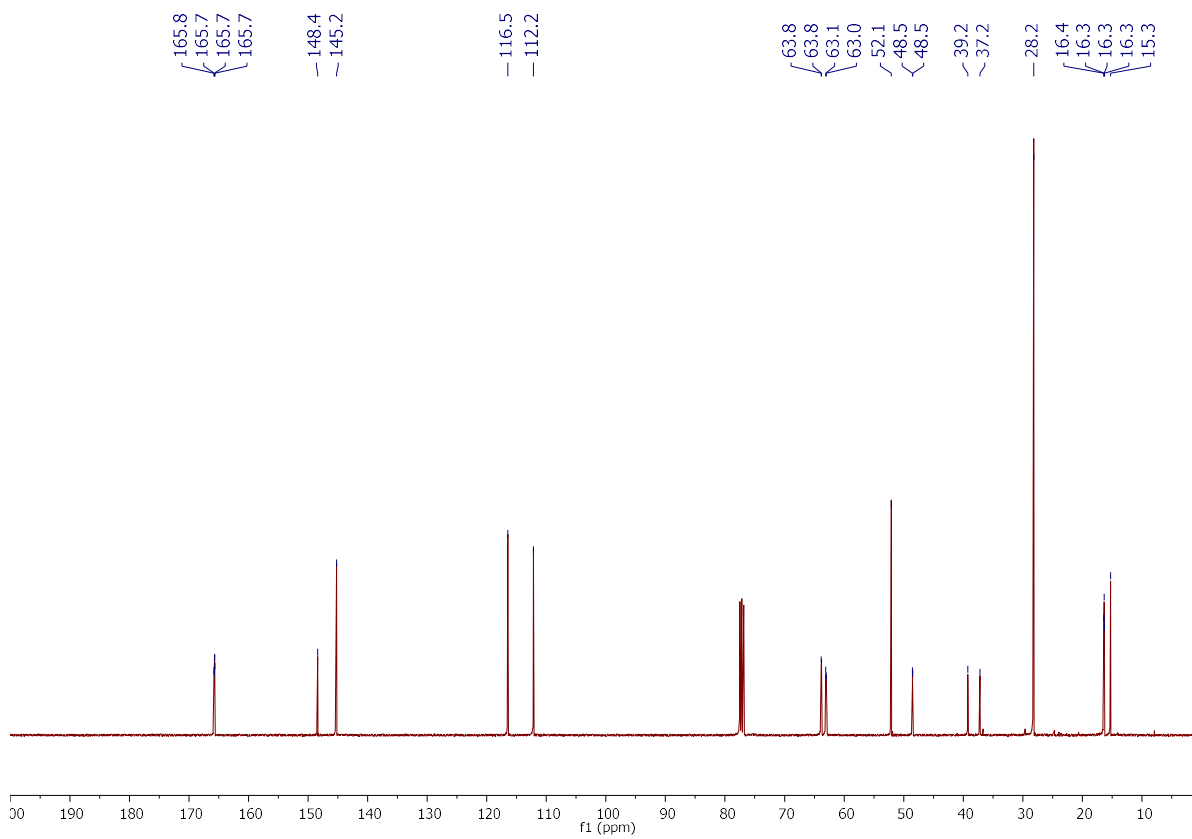



$^{31}\text{P}$  (160 MHz,  $\text{CDCl}_3$ ) of *N*-Acylaziridine Phosphonate **5c**

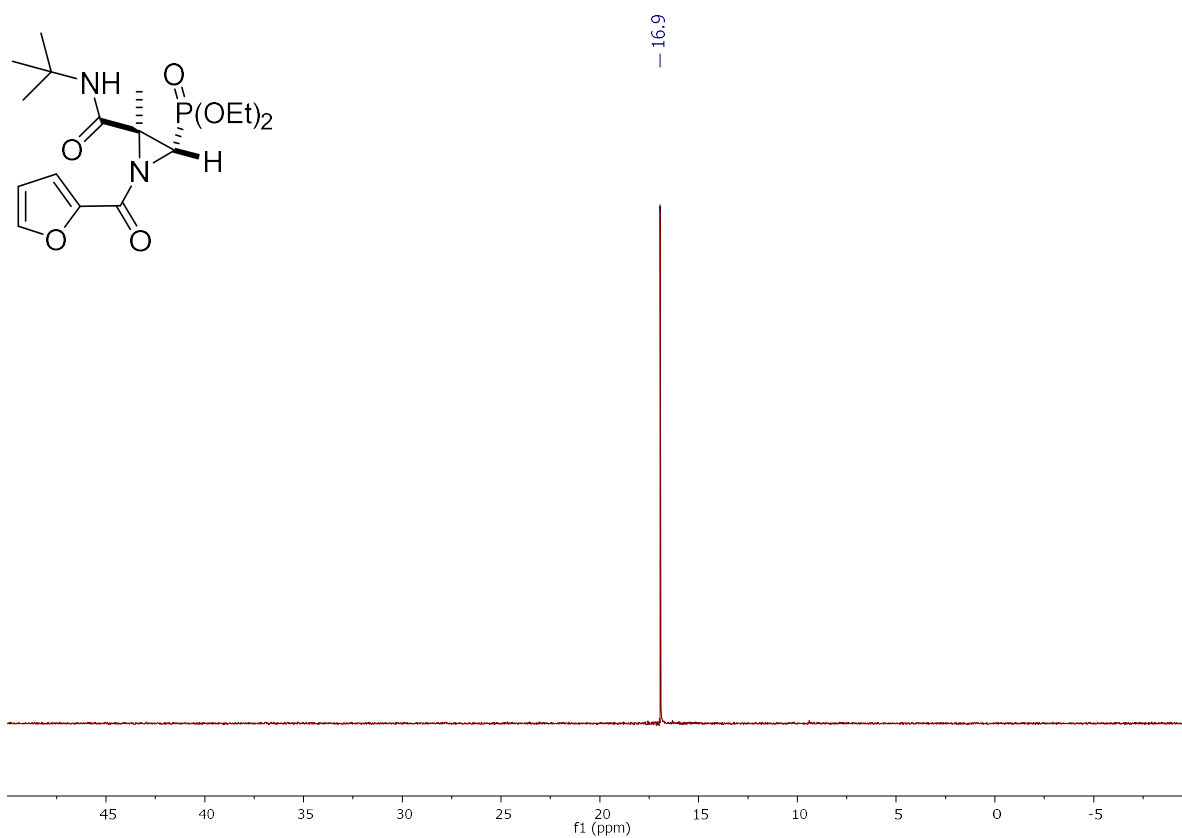

<sup>1</sup>H NMR (400 MHz, CDCl<sub>3</sub>) of *N*-Acylaziridine Phosphonate **5d**

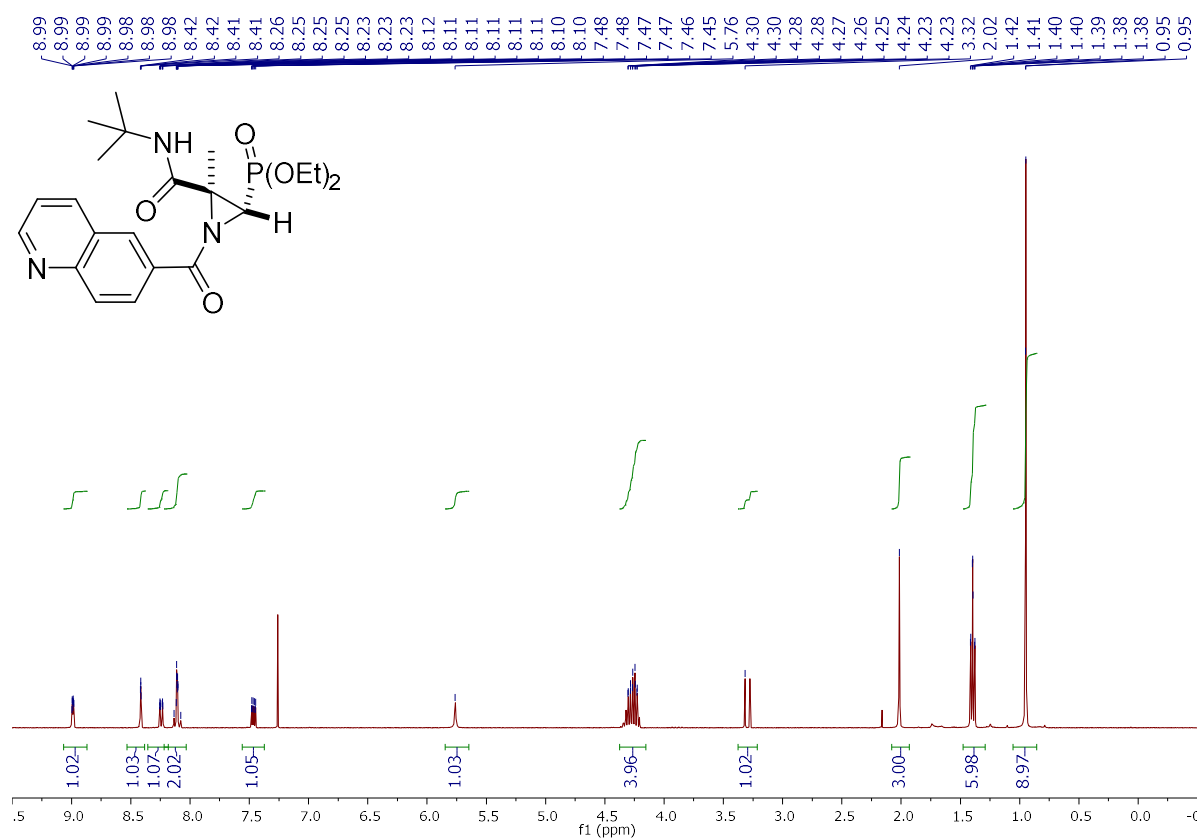

<sup>13</sup>C {<sup>1</sup>H} NMR (100 MHz, CDCl<sub>3</sub>) of *N*-Acylaziridine Phosphonate **5d**

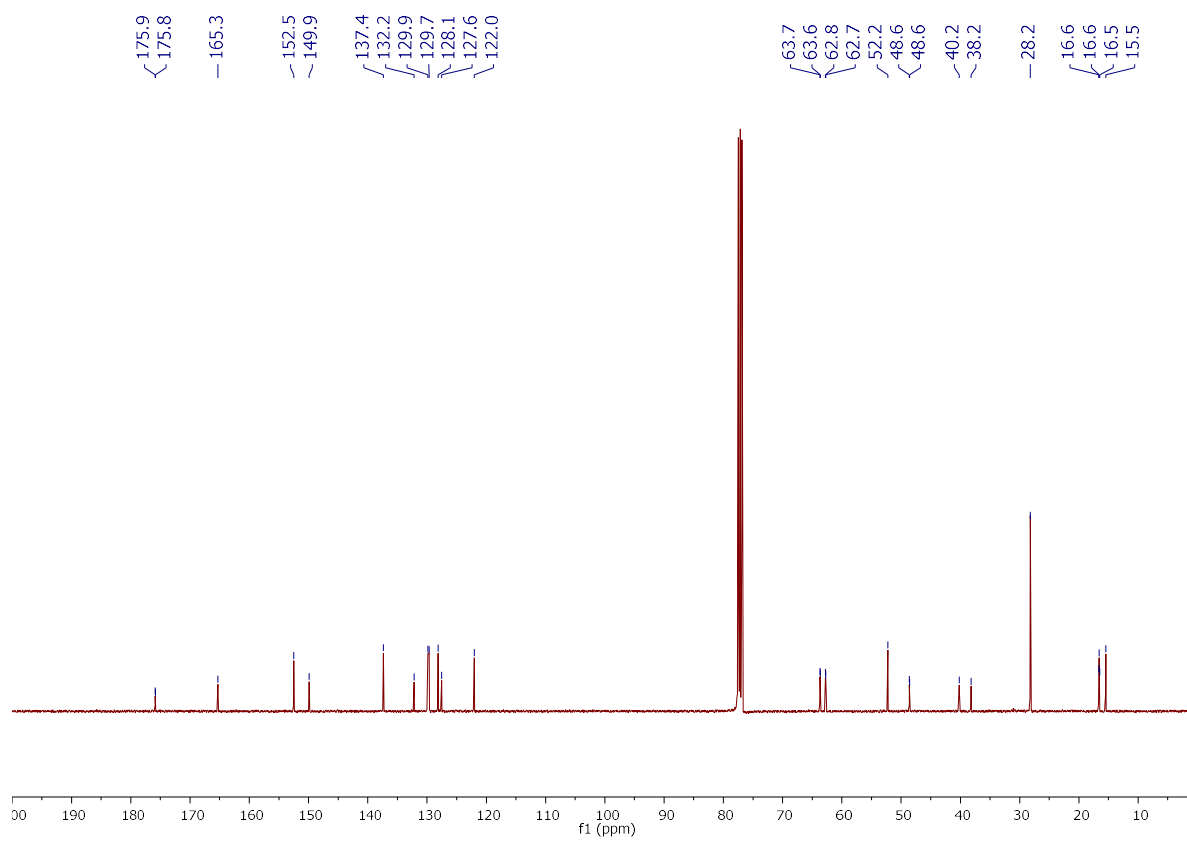

<sup>31</sup>P (160 MHz, CDCl<sub>3</sub>) of *N*-Acylaziridine Phosphonate **5d**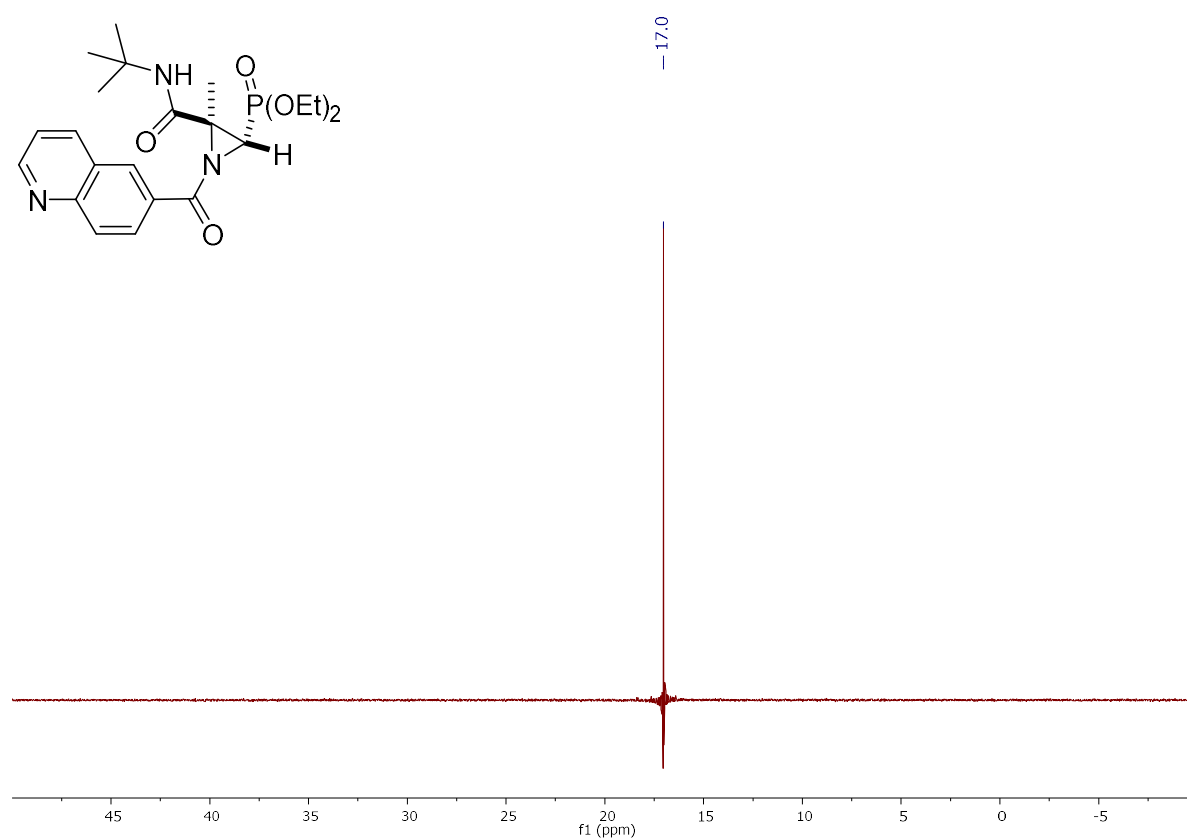

$^1\text{H}$  NMR (400 MHz,  $\text{CDCl}_3$ ) of *N*-Acylaziridine Phosphonate **5e**

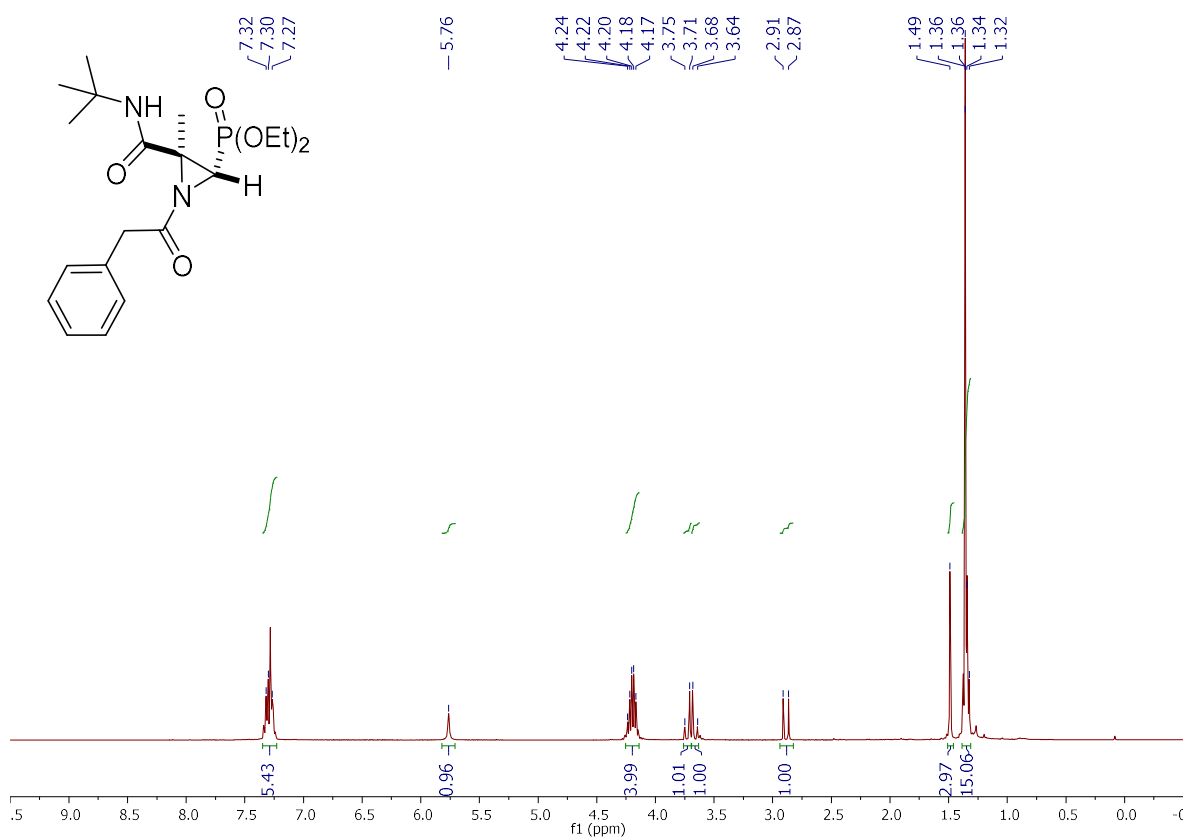

$^{13}\text{C}$  { $^1\text{H}$ } NMR (100 MHz,  $\text{CDCl}_3$ ) of *N*-Acylaziridine Phosphonate **5e**

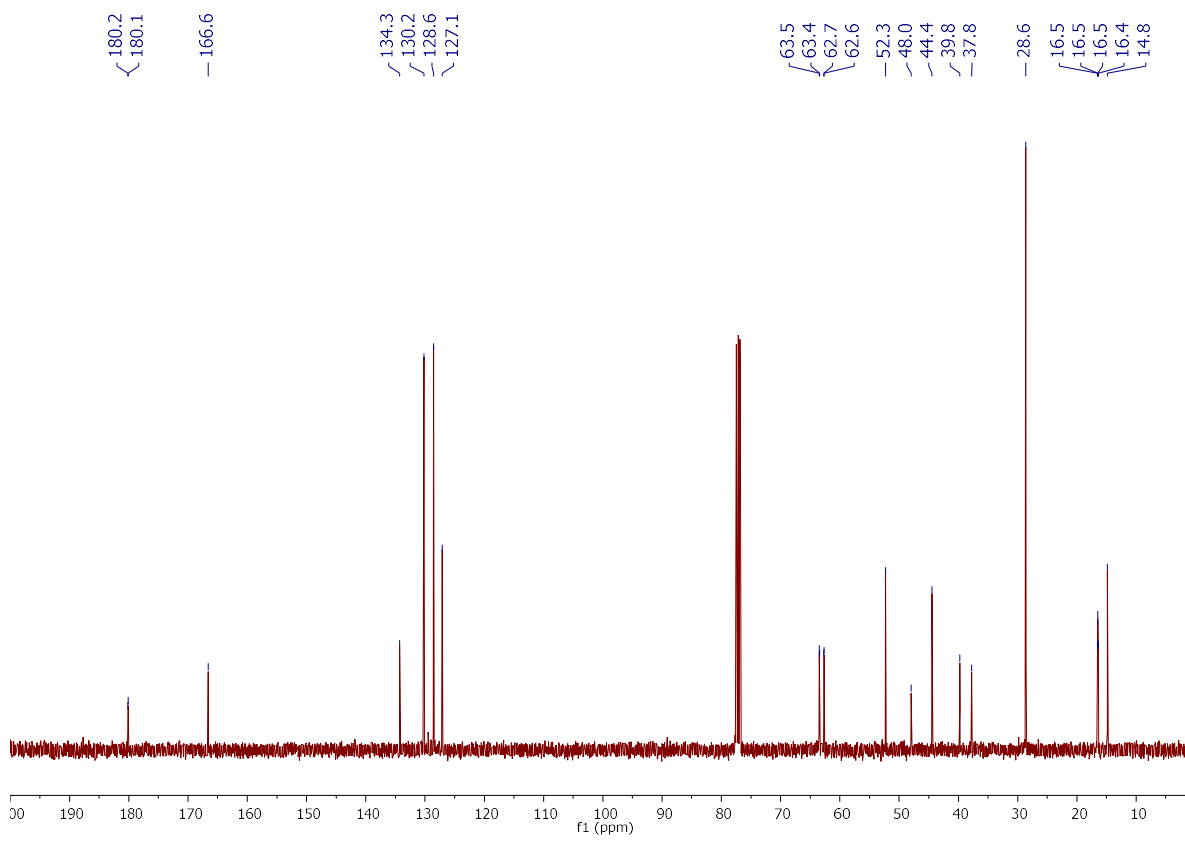

$^{31}\text{P}$  (160 MHz,  $\text{CDCl}_3$ ) of *N*-Acylaziridine Phosphonate **5e**

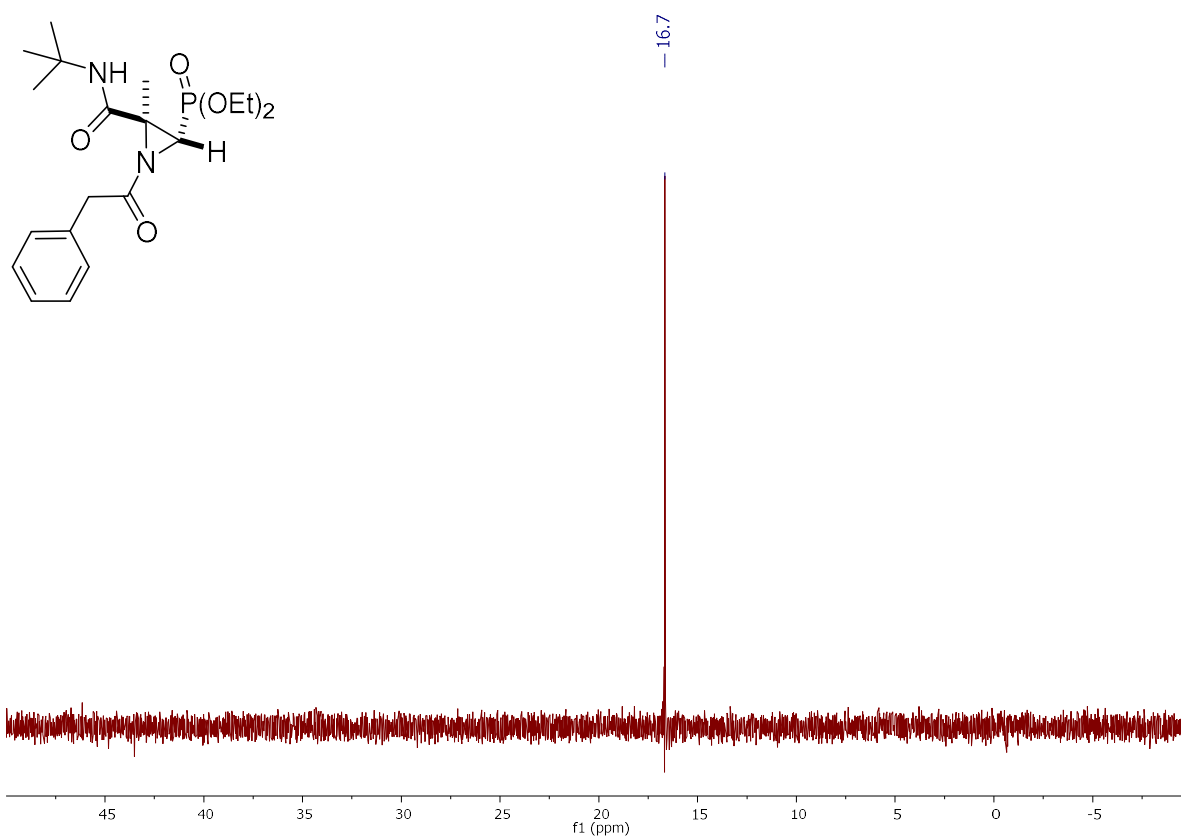

$^1\text{H}$  NMR (400 MHz,  $\text{CDCl}_3$ ) of *N*-Acylaziridine Phosphonate **5f**

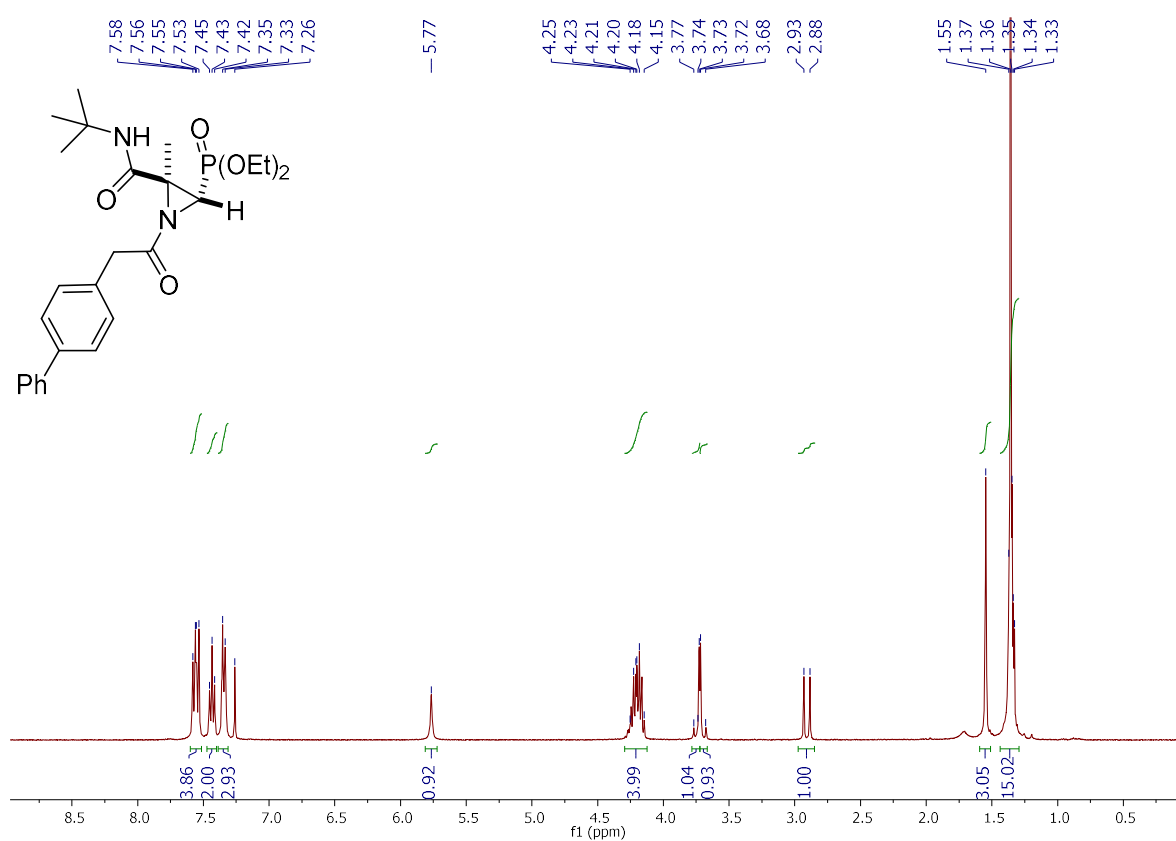

$^{13}\text{C}$   $\{^1\text{H}\}$  NMR (100 MHz,  $\text{CDCl}_3$ ) of *N*-Acylaziridine Phosphonate **5f**

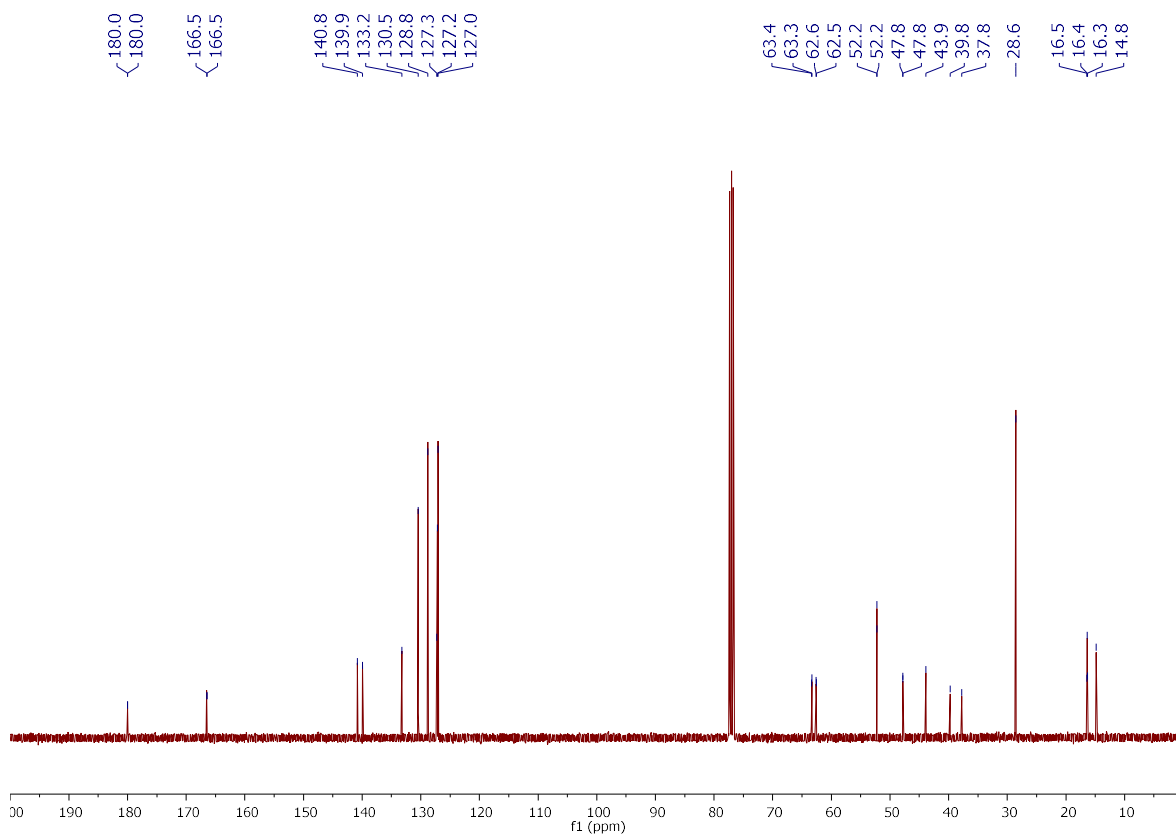

$^{31}\text{P}$  (160 MHz,  $\text{CDCl}_3$ ) of *N*-Acylaziridine Phosphonate **5f**

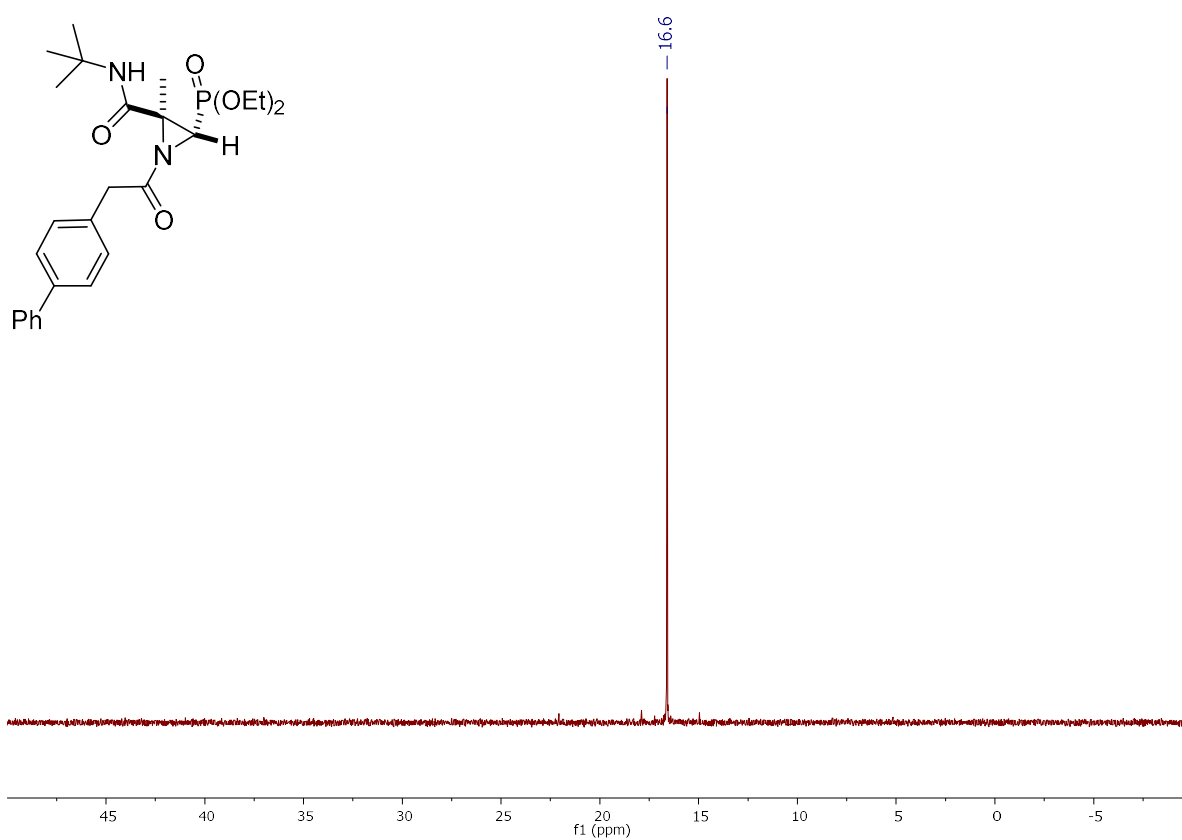

<sup>1</sup>H NMR (400 MHz, CDCl<sub>3</sub>) of *N*-Acylaziridine Phosphonate **5g**

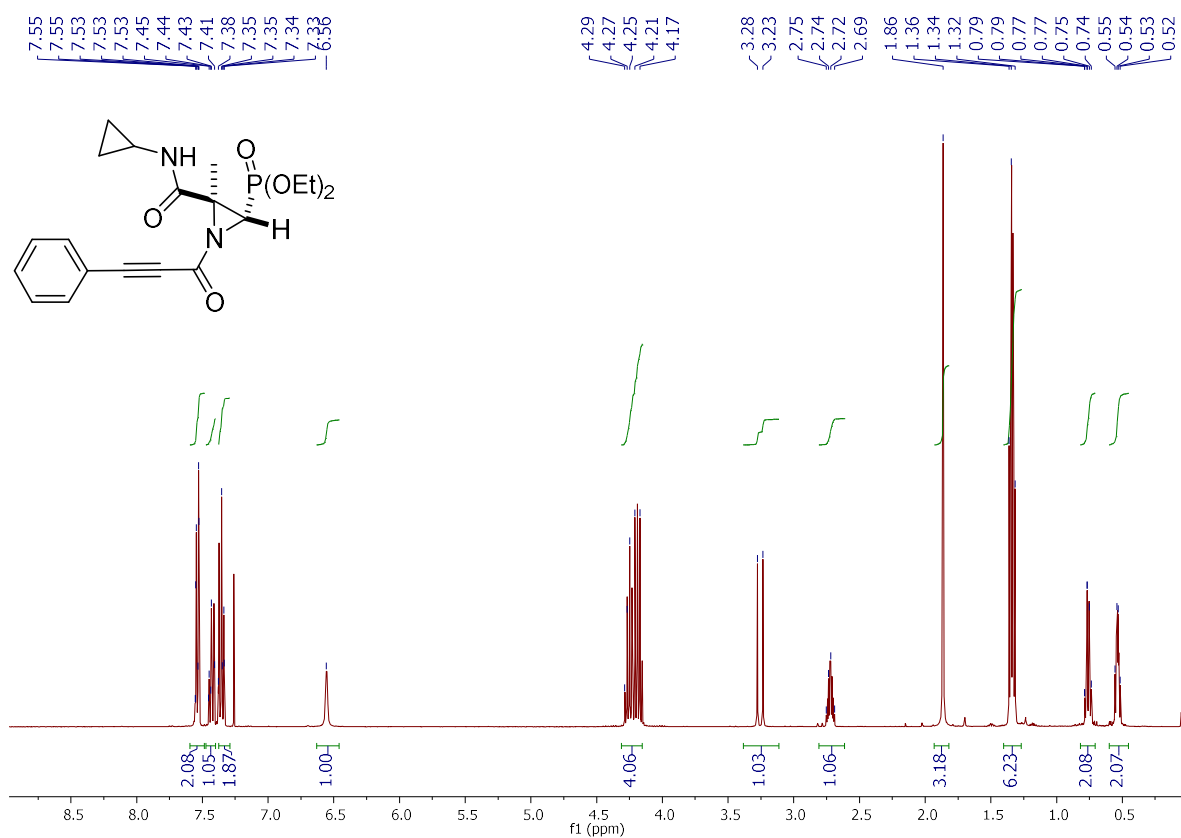

<sup>13</sup>C {<sup>1</sup>H} NMR (100 MHz, CDCl<sub>3</sub>) of *N*-Acylaziridine Phosphonate **5g**

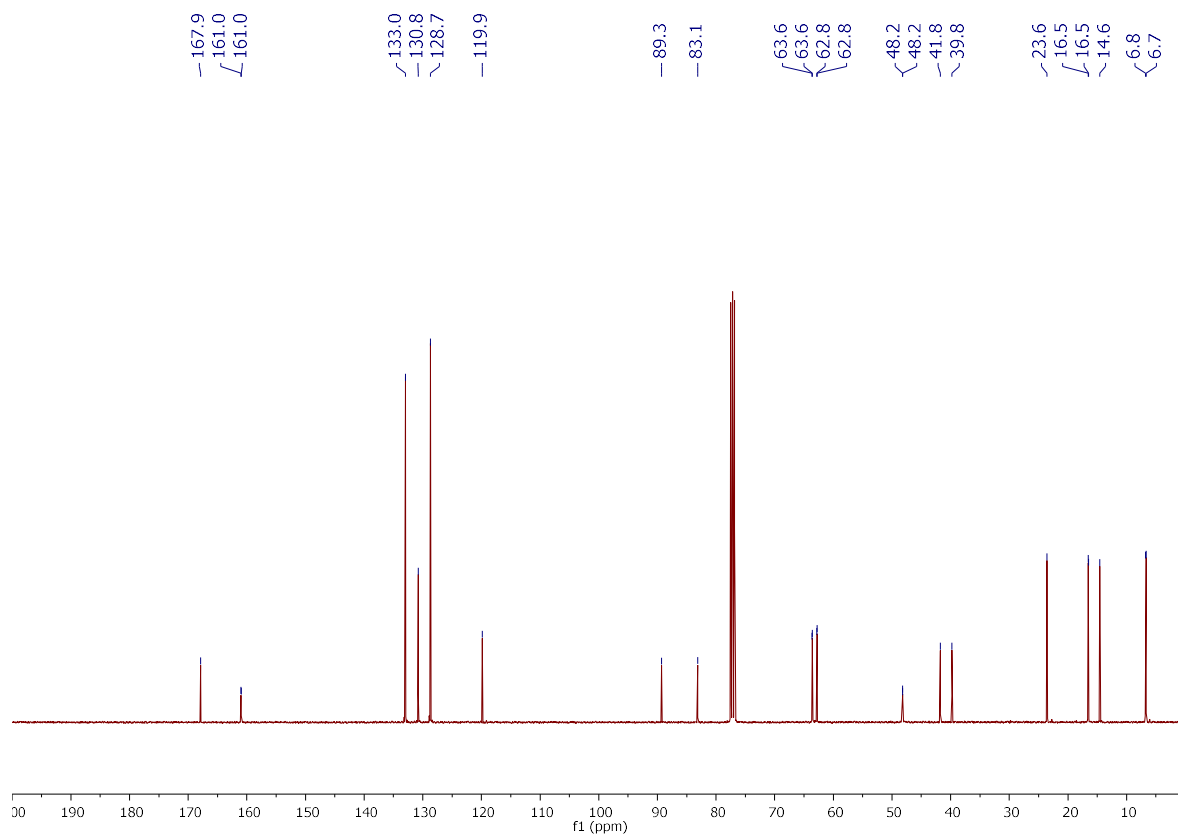



$^{31}\text{P}$  (160 MHz,  $\text{CDCl}_3$ ) of *N*-Acylaziridine Phosphonate **5g**

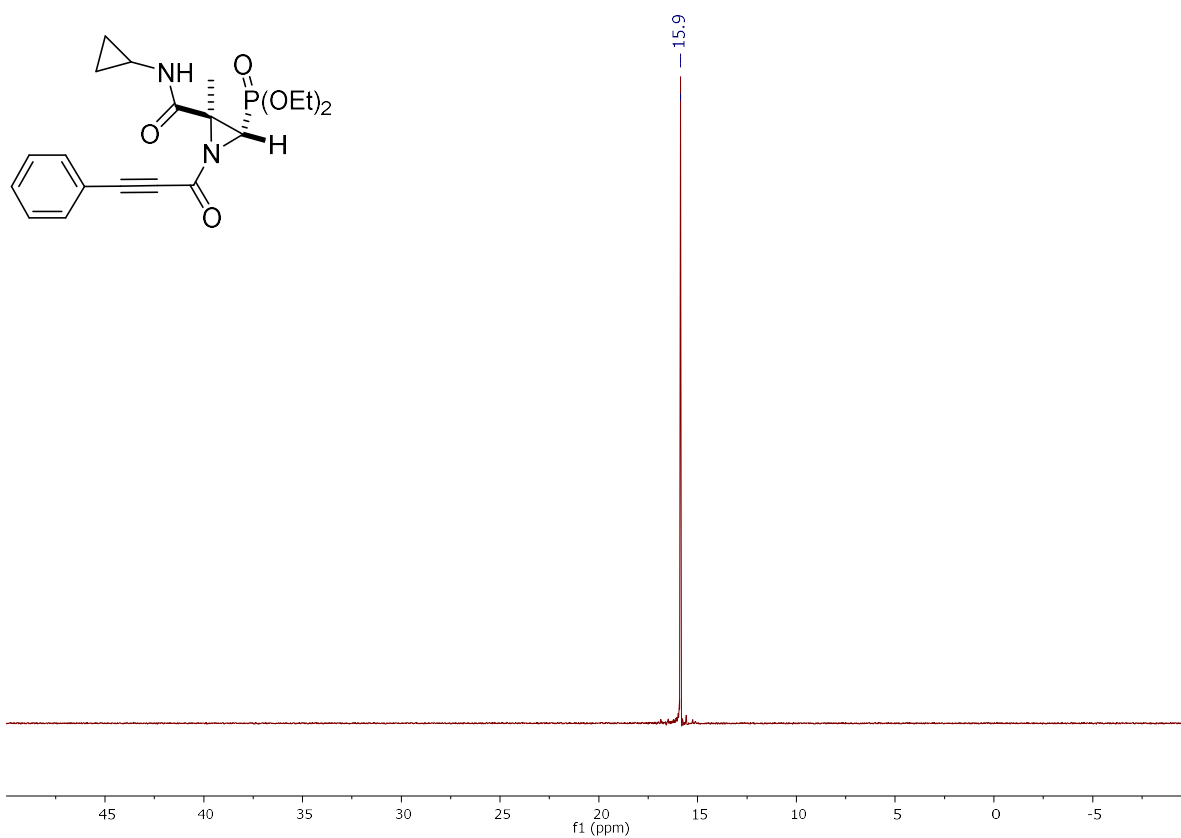

$^1\text{H}$  NMR (400 MHz,  $\text{CDCl}_3$ ) of *N*-Acylaziridine Phosphonate **5h**

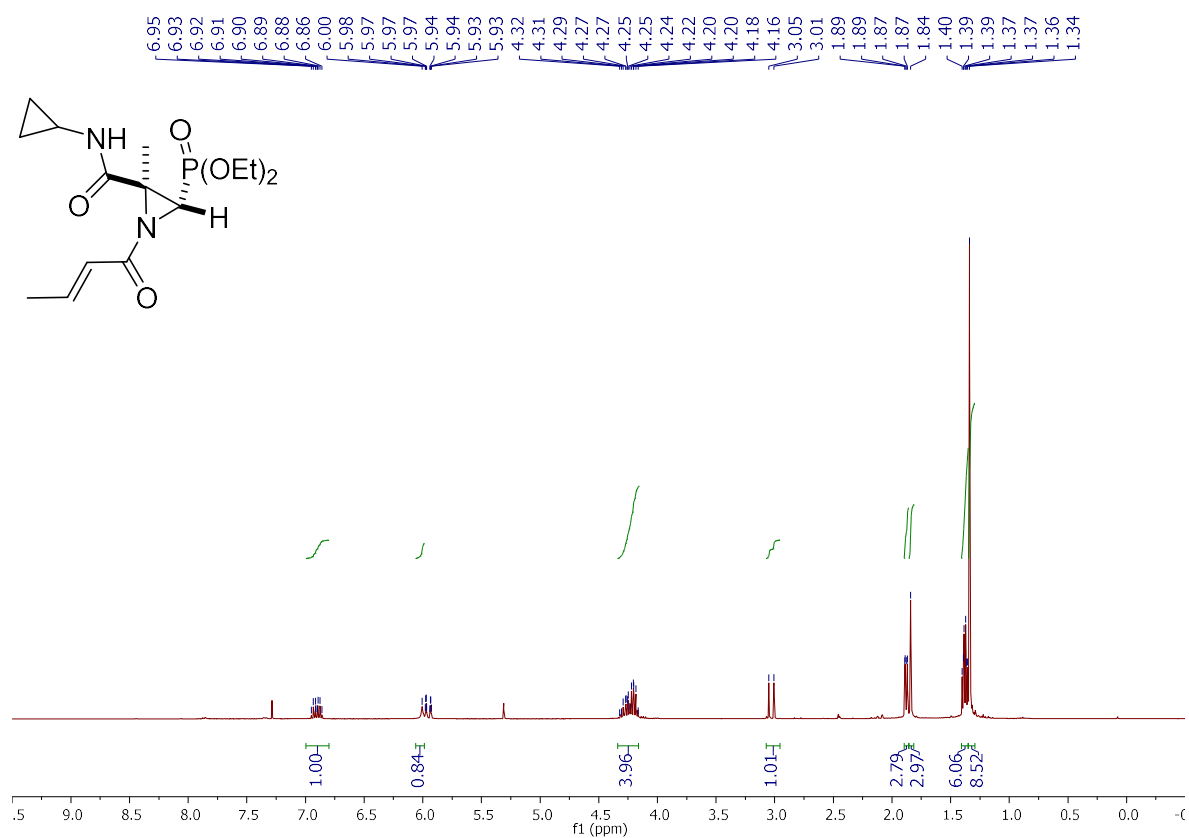

$^{13}\text{C}$  { $^1\text{H}$ } NMR (100 MHz,  $\text{CDCl}_3$ ) of *N*-Acylaziridine Phosphonate **5h**

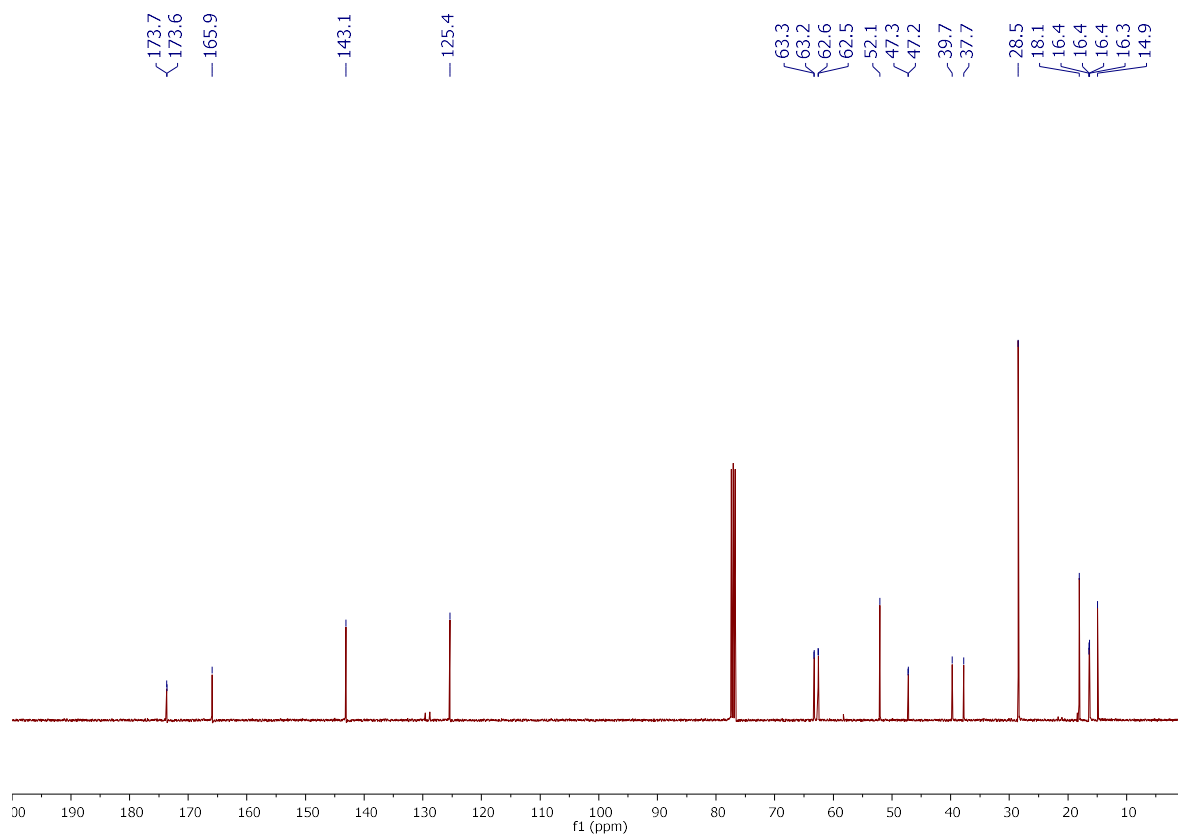

$^{31}\text{P}$  (160 MHz,  $\text{CDCl}_3$ ) of *N*-Acylaziridine Phosphonate **5h**

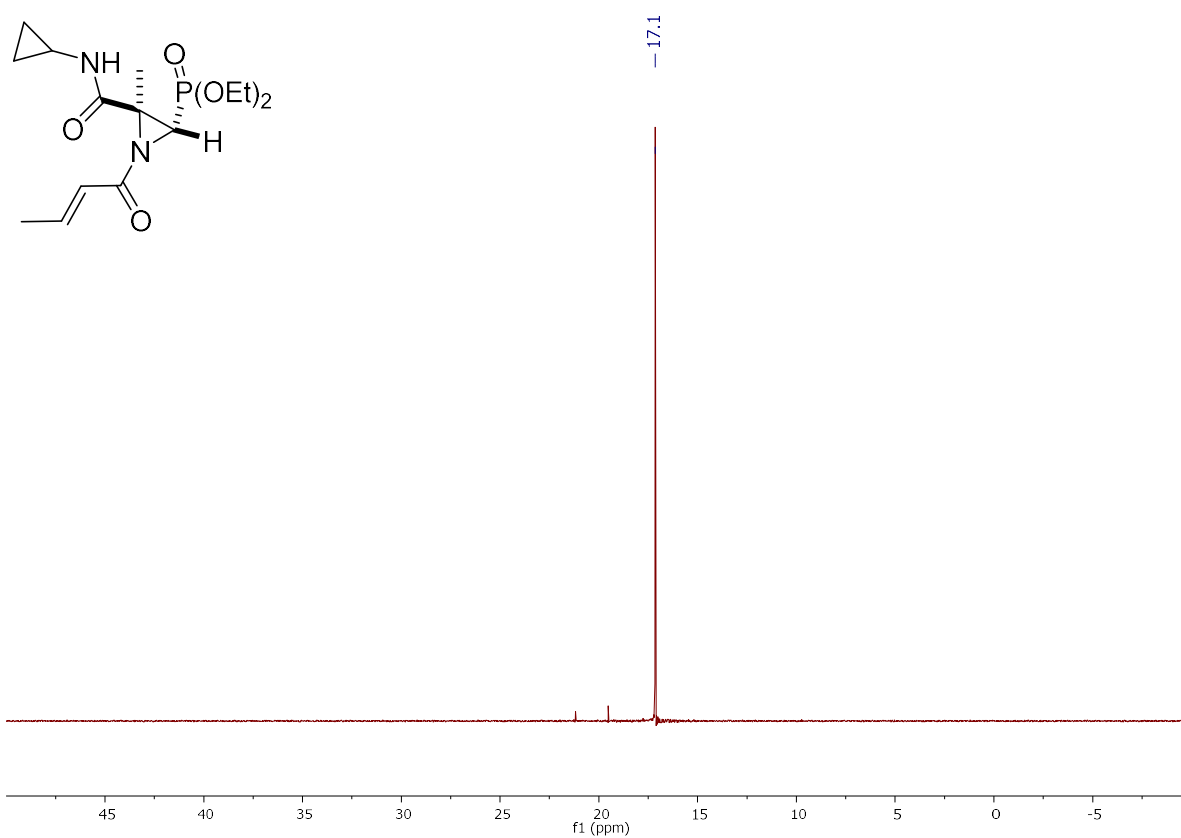

$^1\text{H}$  NMR (400 MHz,  $\text{CDCl}_3$ ) of *N*-Acylaziridine Peptidomimetic **6a**

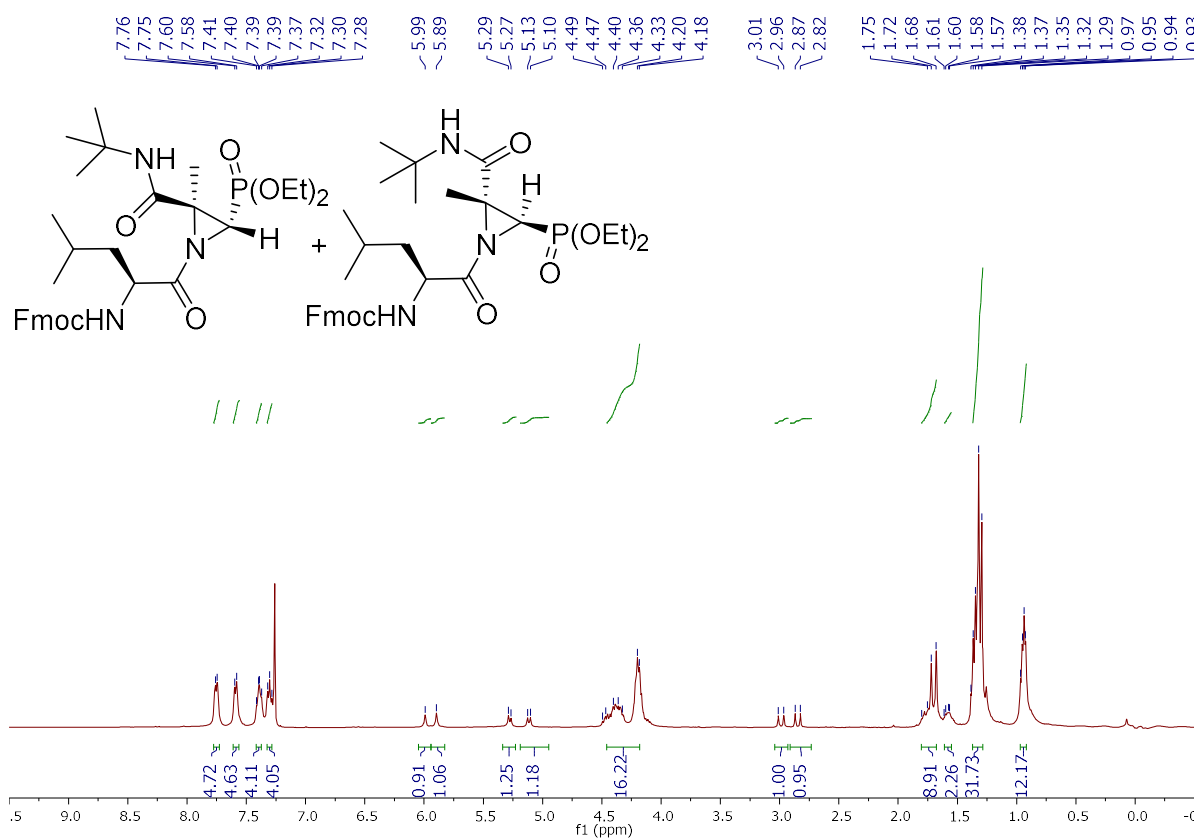

$^{13}\text{C}$   $\{^1\text{H}\}$  NMR (100 MHz,  $\text{CDCl}_3$ ) of *N*-Acylaziridine Peptidomimetic **6a**

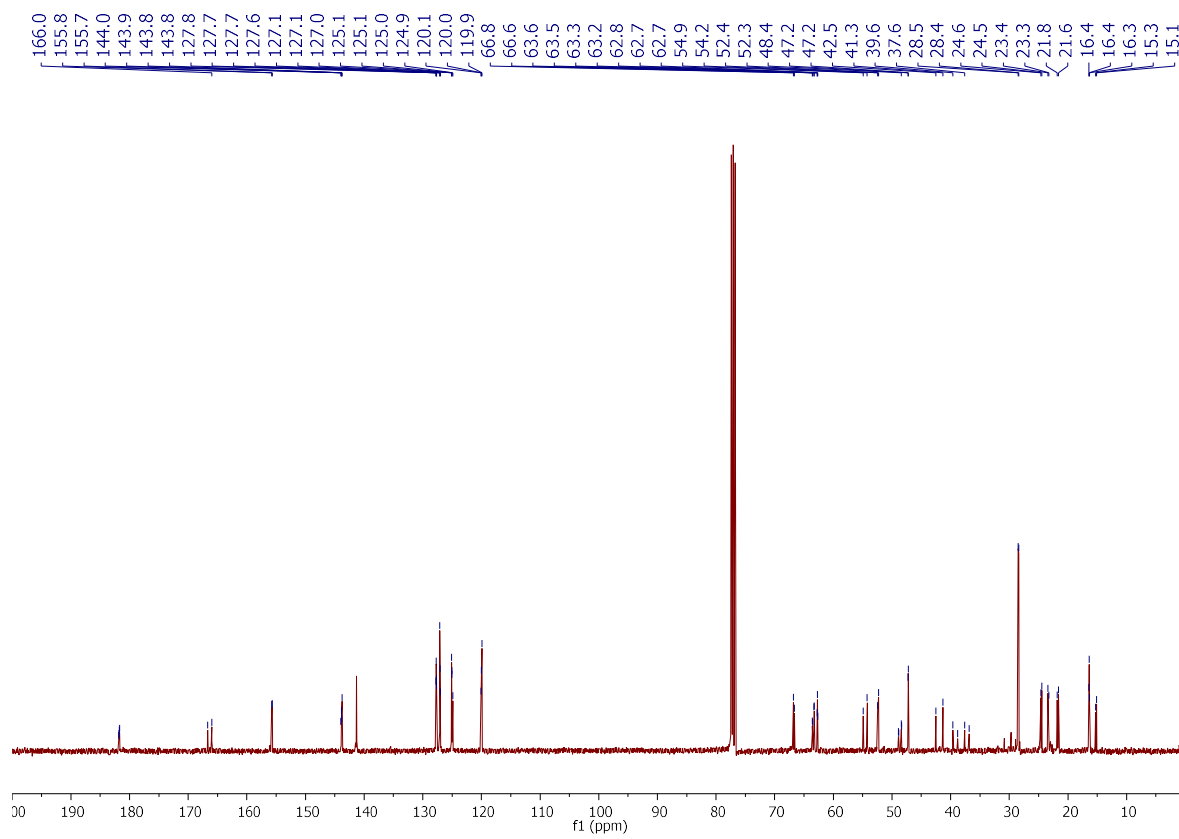

$^{31}\text{P}$  (160 MHz,  $\text{CDCl}_3$ ) of *N*-Acylaziridine Peptidomimetic **6a**

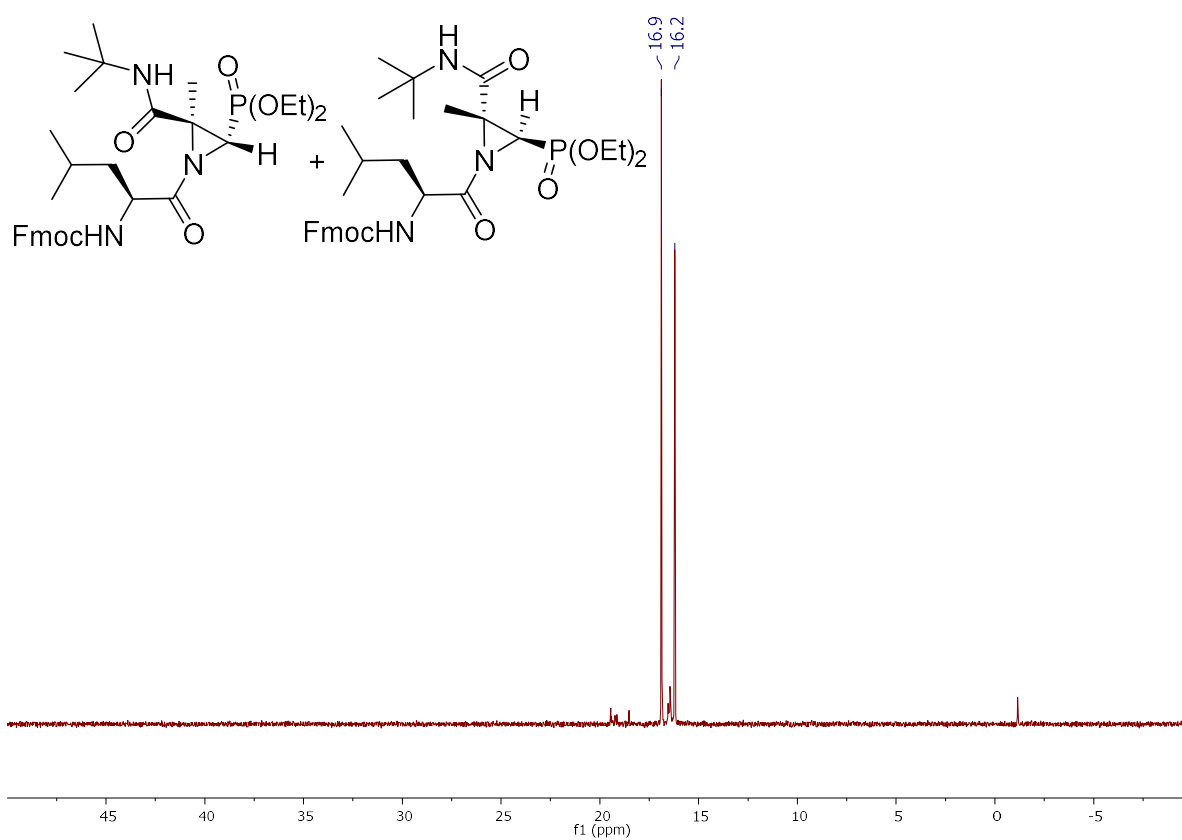

$^1\text{H}$  NMR (400 MHz,  $\text{CDCl}_3$ ) of *N*-Acylaziridine Peptidomimetic **6b**

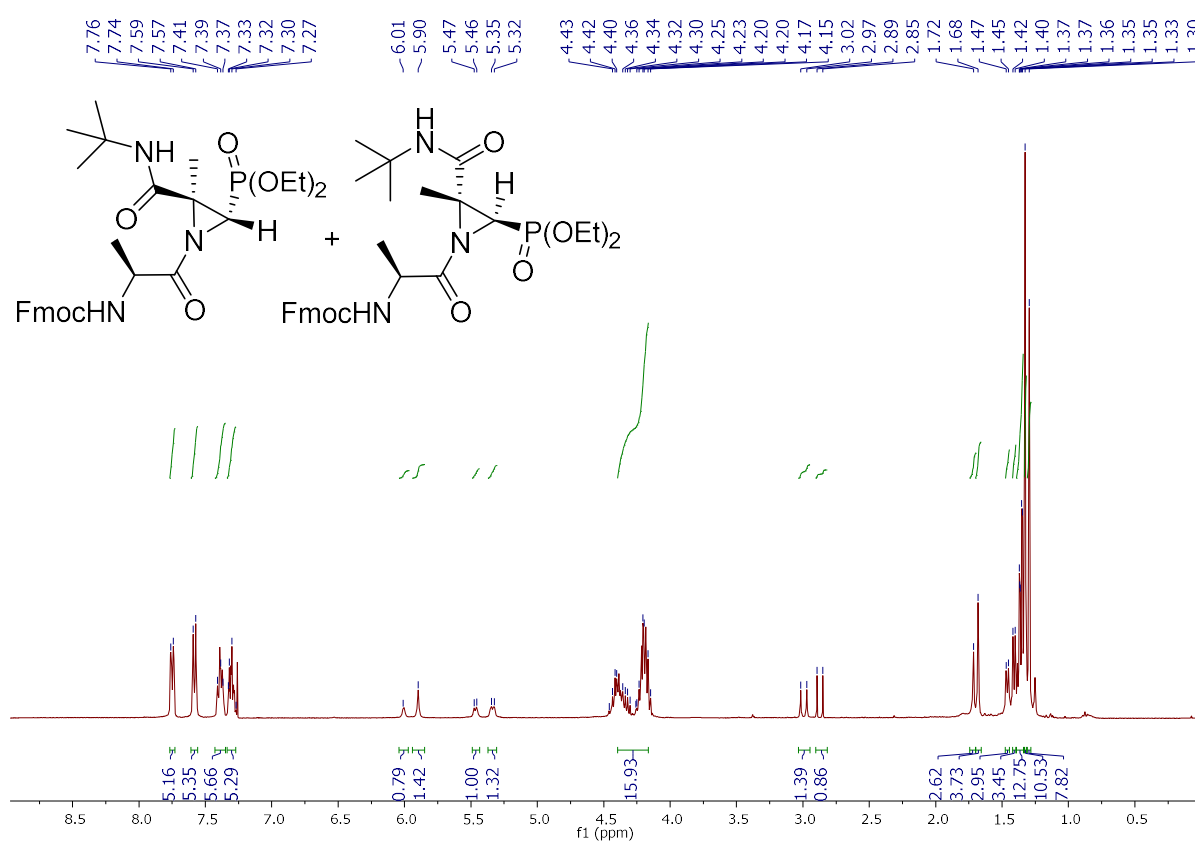

$^{13}\text{C}$   $\{^1\text{H}\}$  NMR (100 MHz,  $\text{CDCl}_3$ ) of *N*-Acylaziridine Peptidomimetic **6b**

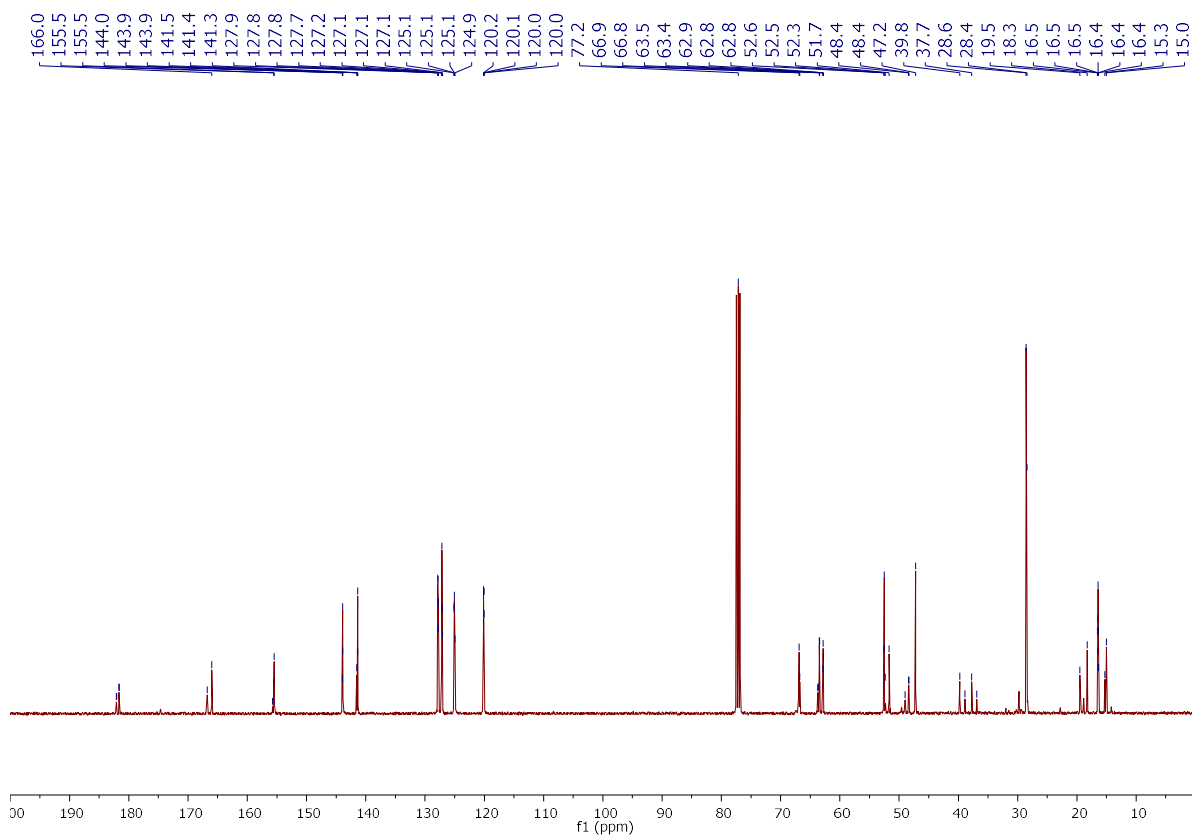

$^{31}\text{P}$  (160 MHz,  $\text{CDCl}_3$ ) of *N*-Acylaziridine Peptidomimetic **6b**

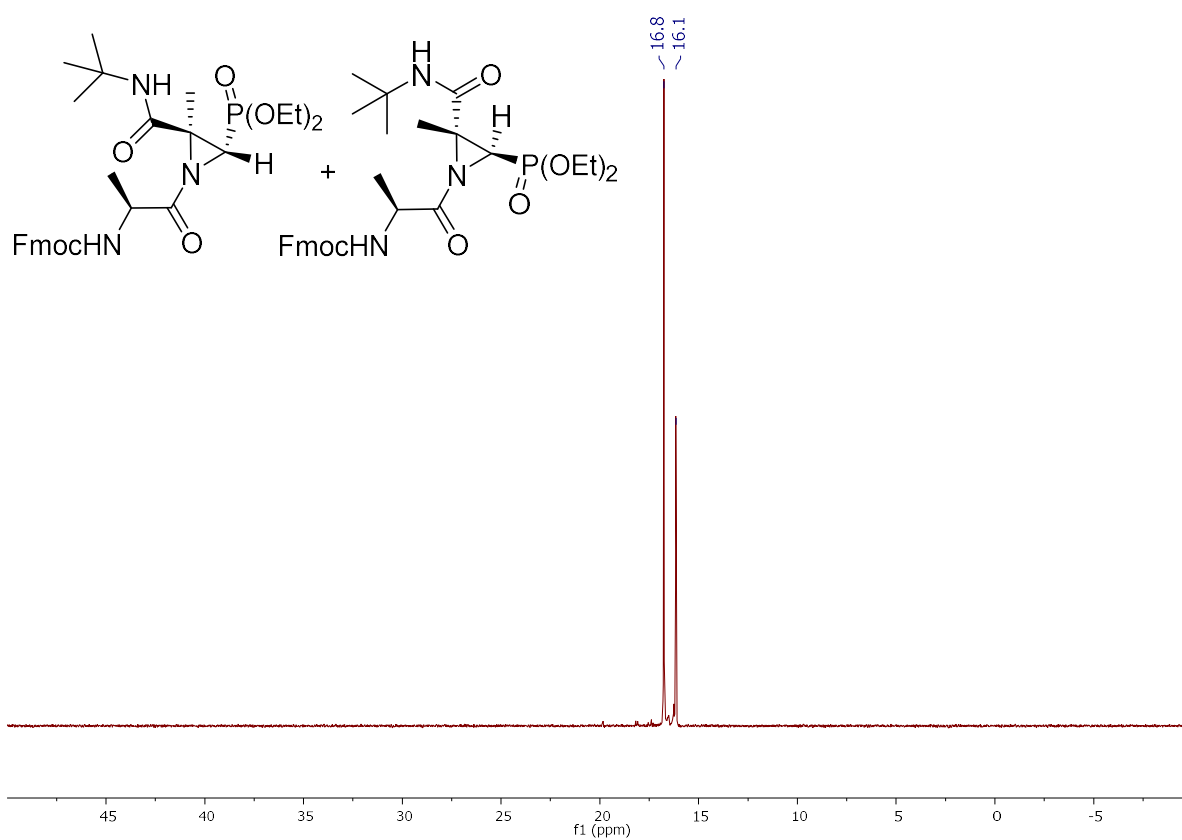

$^1\text{H}$  NMR (400 MHz,  $\text{CDCl}_3$ ) of Oxazole Derivative **7a**

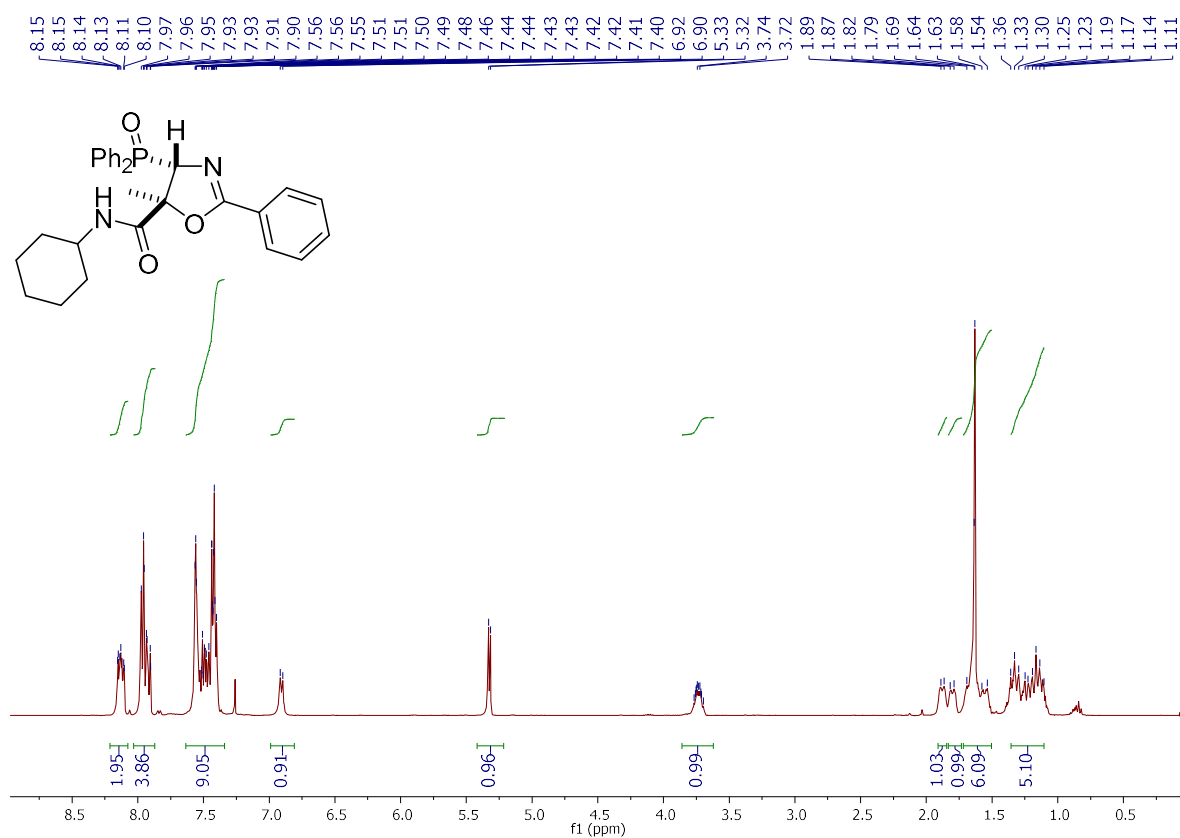

$^{13}\text{C}$   $\{^1\text{H}\}$  NMR (100 MHz,  $\text{CDCl}_3$ ) of Oxazole Derivative **7a**

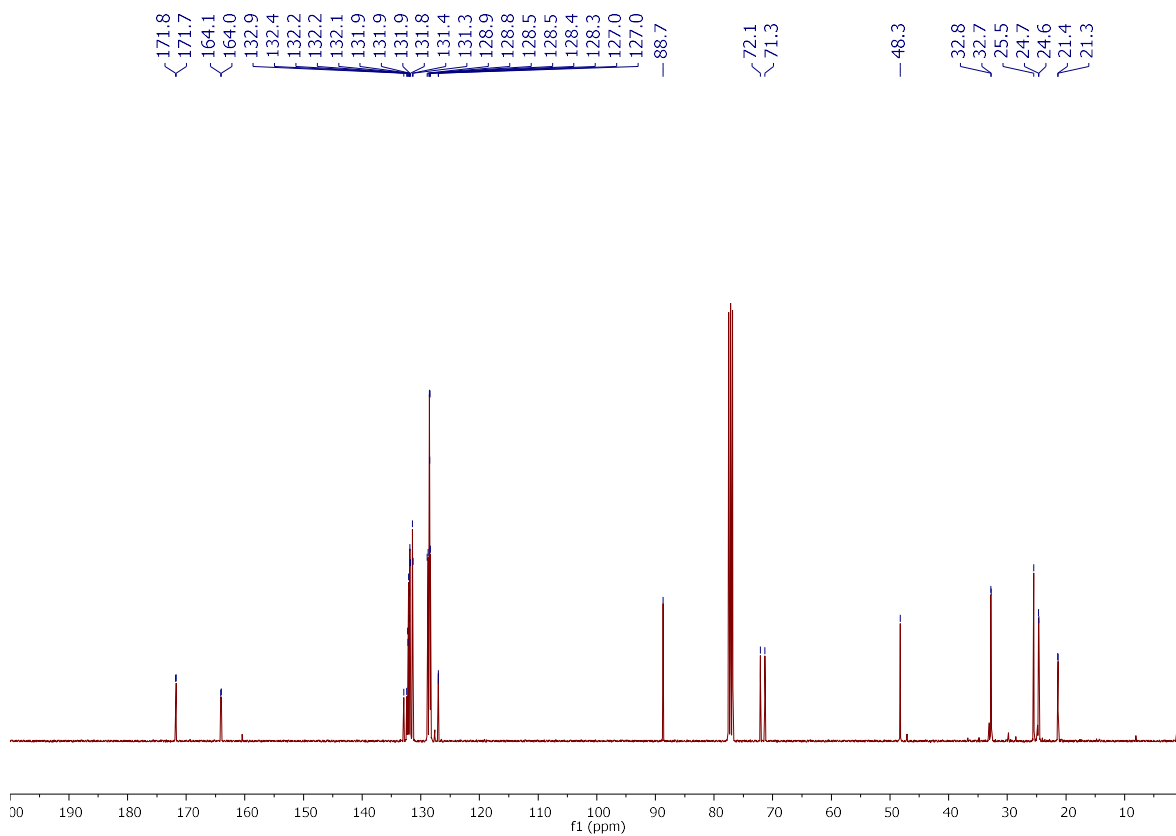



$^{31}\text{P}$  (160 MHz,  $\text{CDCl}_3$ ) of Oxazole Derivative **7a**

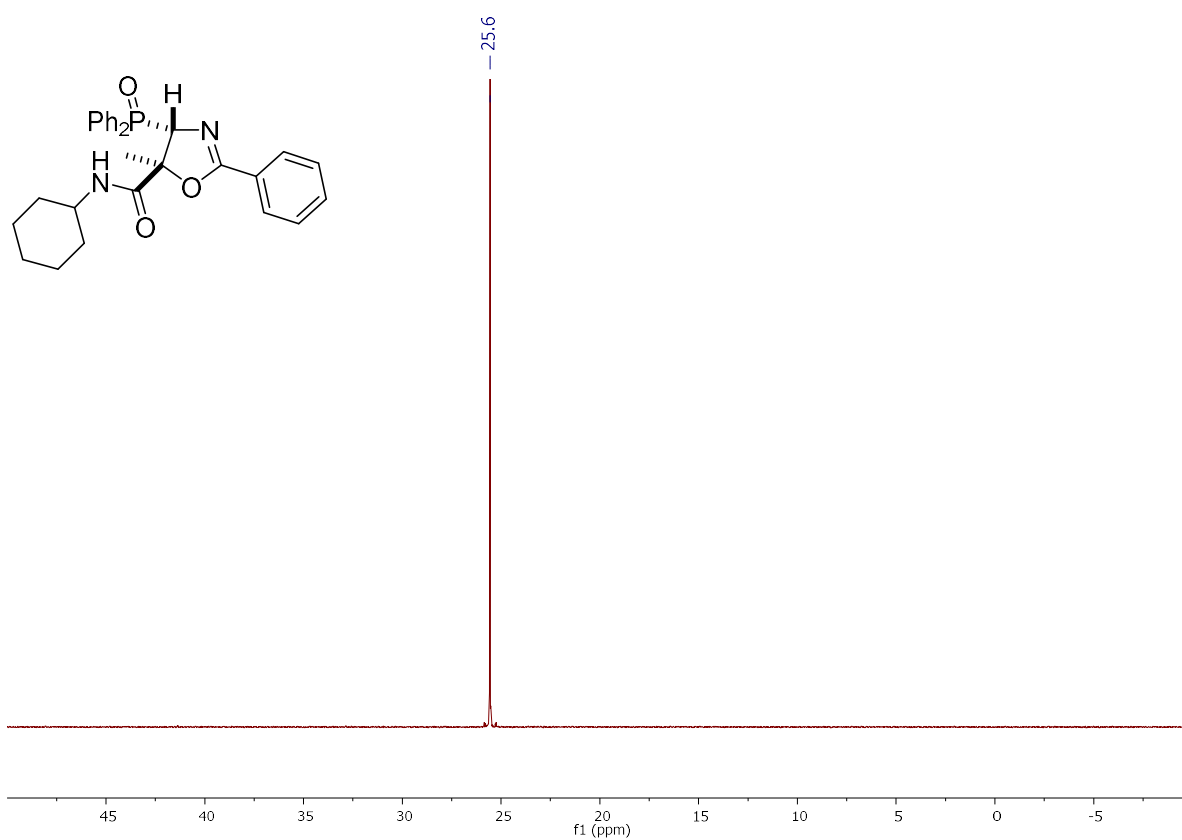

<sup>1</sup>H NMR (400 MHz, CDCl<sub>3</sub>) of Oxazole Derivative **7b**

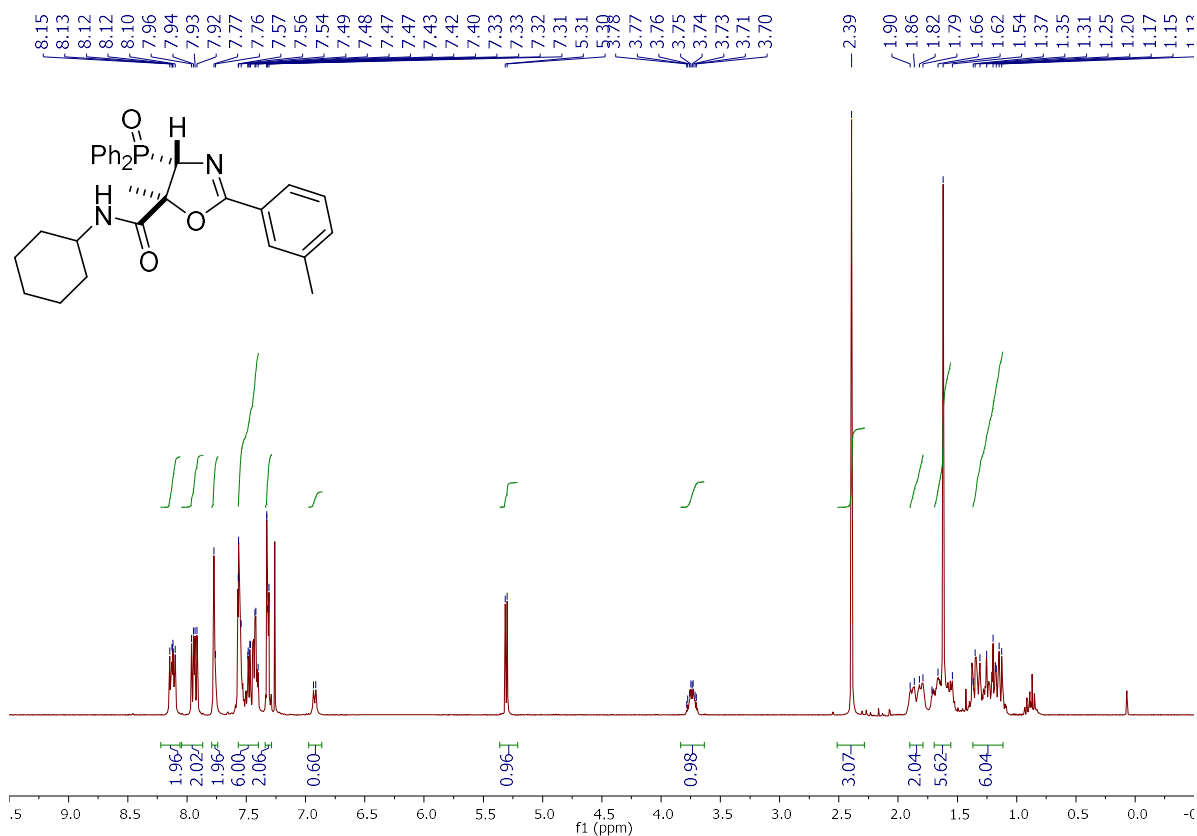

<sup>13</sup>C {<sup>1</sup>H} NMR (100 MHz, CDCl<sub>3</sub>) of Oxazole Derivative **7b**

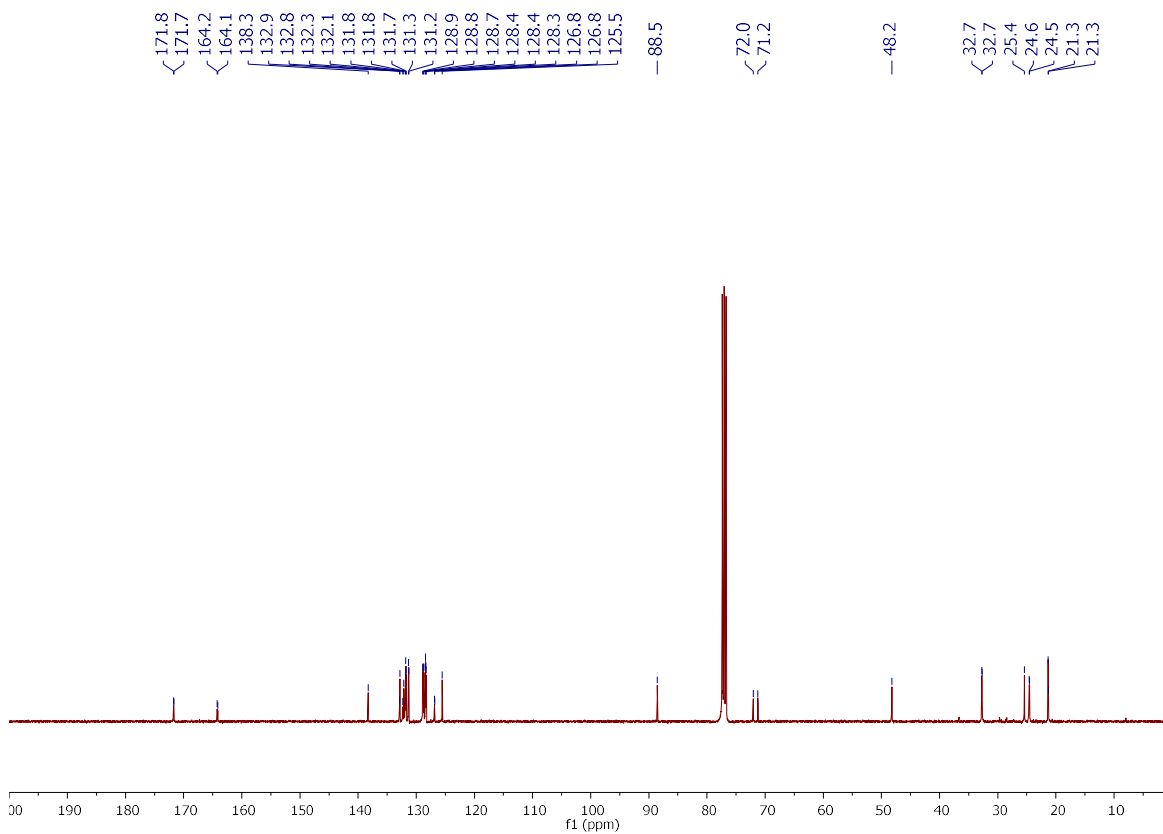

$^{31}\text{P}$  (160 MHz,  $\text{CDCl}_3$ ) of Oxazole Derivative **7b**

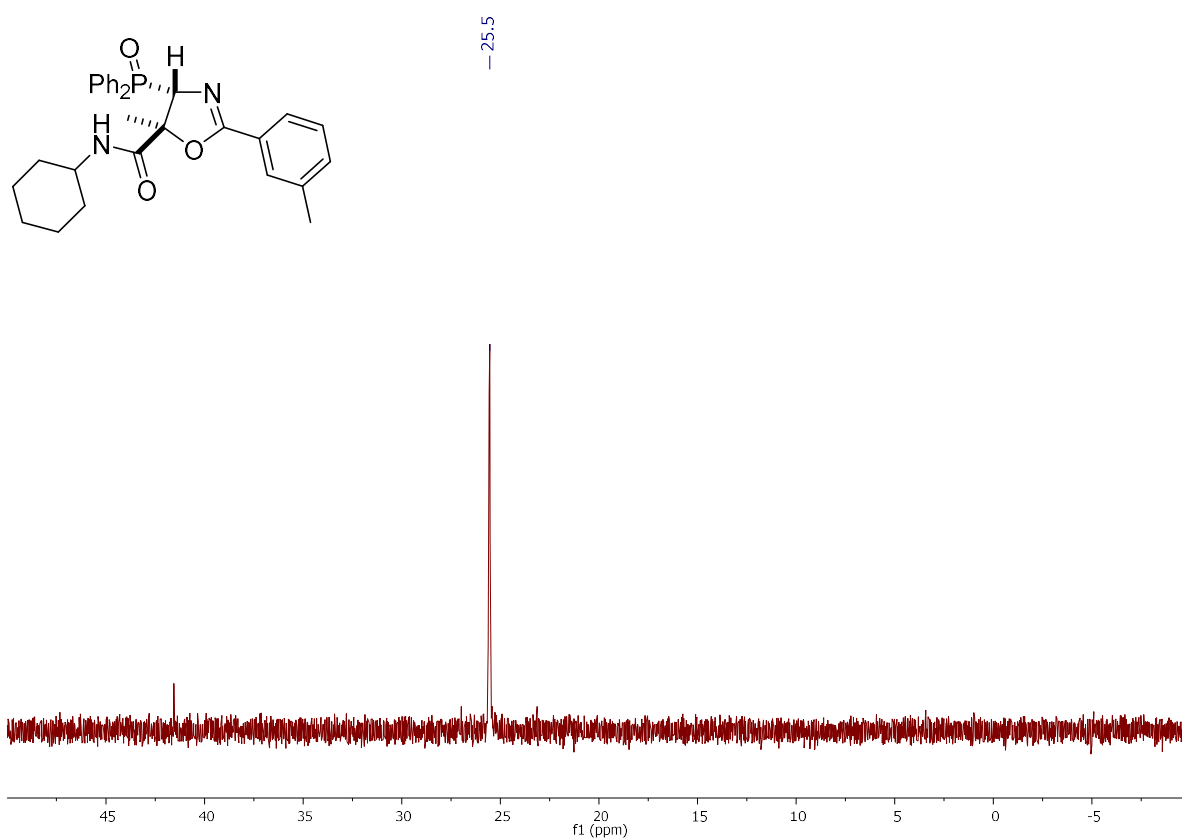

$^1\text{H}$  NMR (400 MHz,  $\text{CDCl}_3$ ) of Oxazole Derivative **7c**

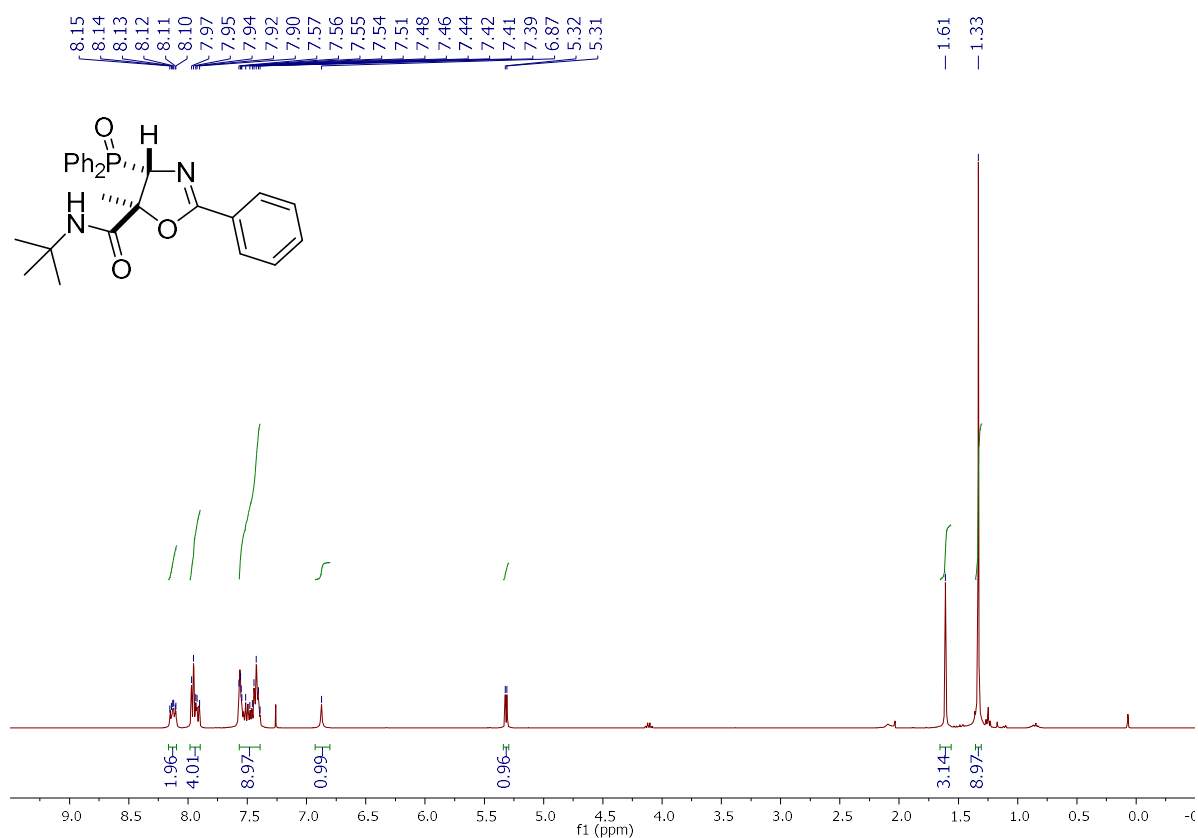

$^{13}\text{C}$  { $^1\text{H}$ } NMR (100 MHz,  $\text{CDCl}_3$ ) of Oxazole Derivative **7c**

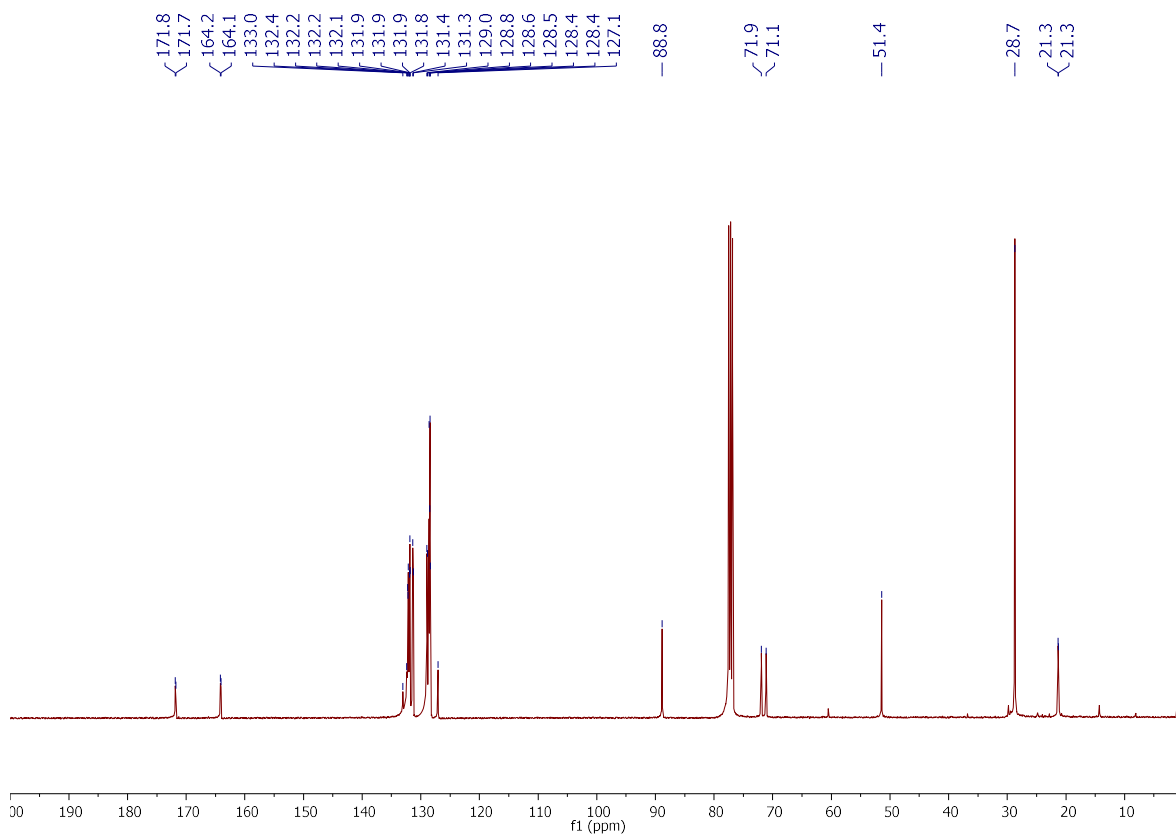

$^{31}\text{P}$  (160 MHz,  $\text{CDCl}_3$ ) of Oxazole Derivative **7c**

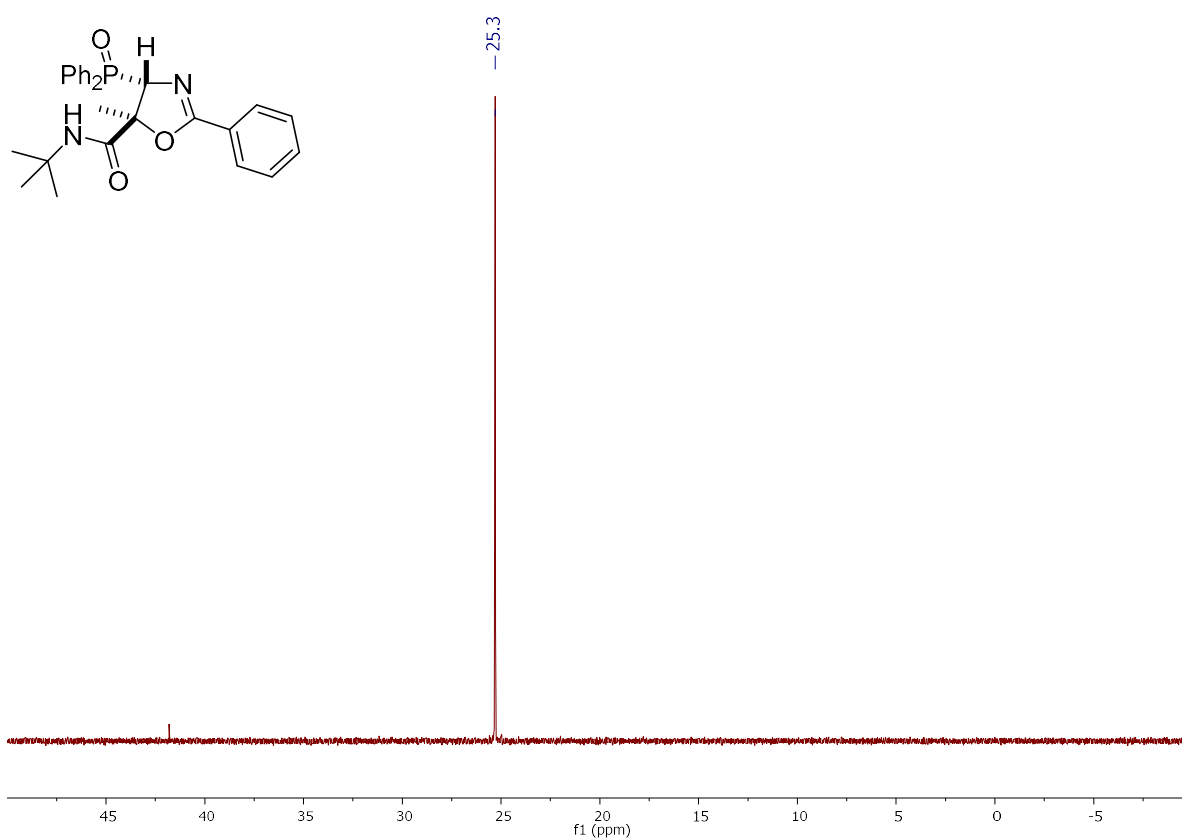

$^1\text{H}$  NMR (400 MHz,  $\text{CDCl}_3$ ) of Oxazole Derivative **7d**

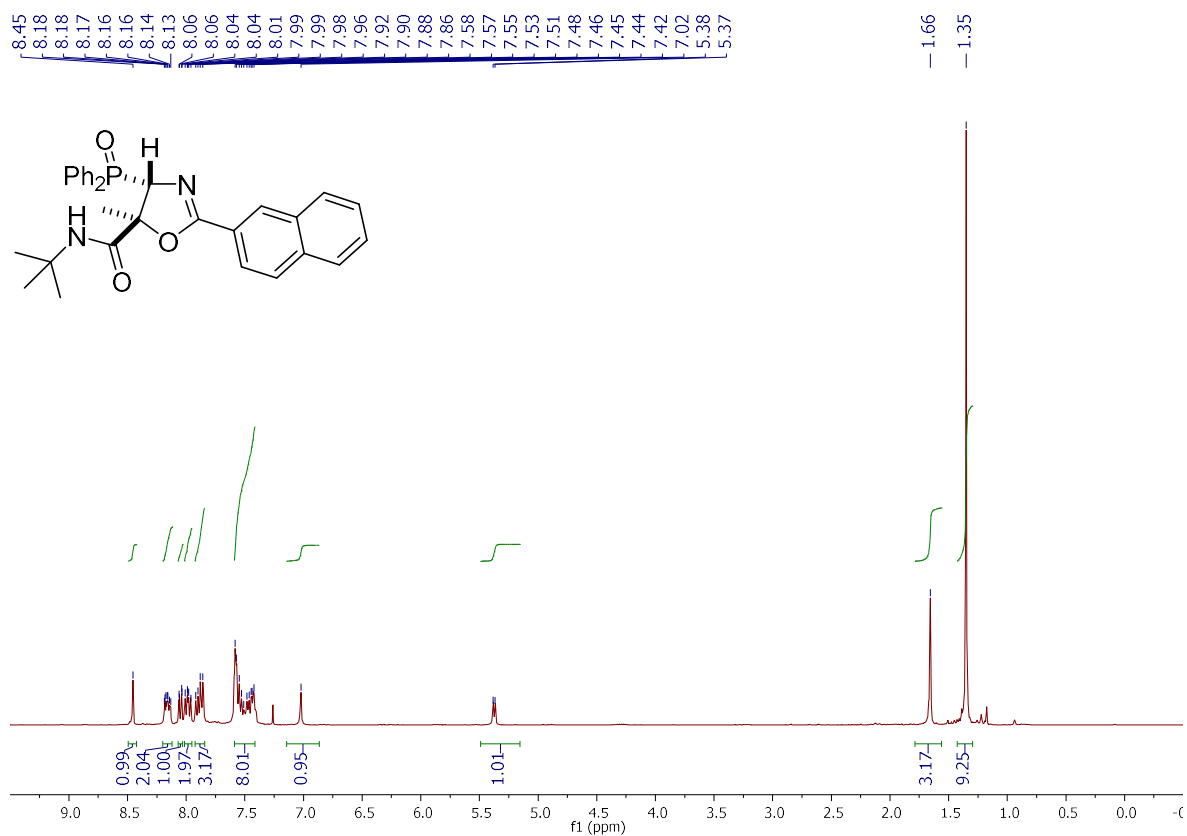

$^{13}\text{C}$  { $^1\text{H}$ } NMR (100 MHz,  $\text{CDCl}_3$ ) of Oxazole Derivative **7d**

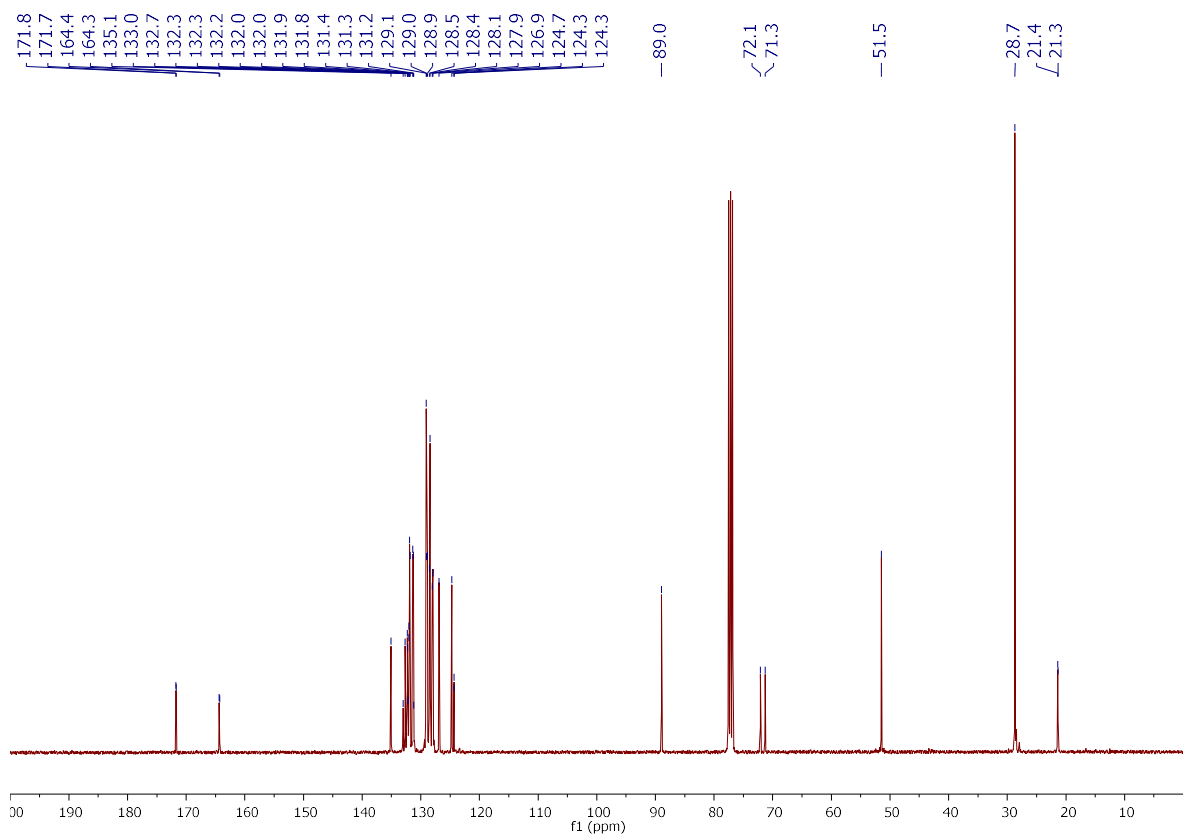

$^{31}\text{P}$  (160 MHz,  $\text{CDCl}_3$ ) of Oxazole Derivative **7d**

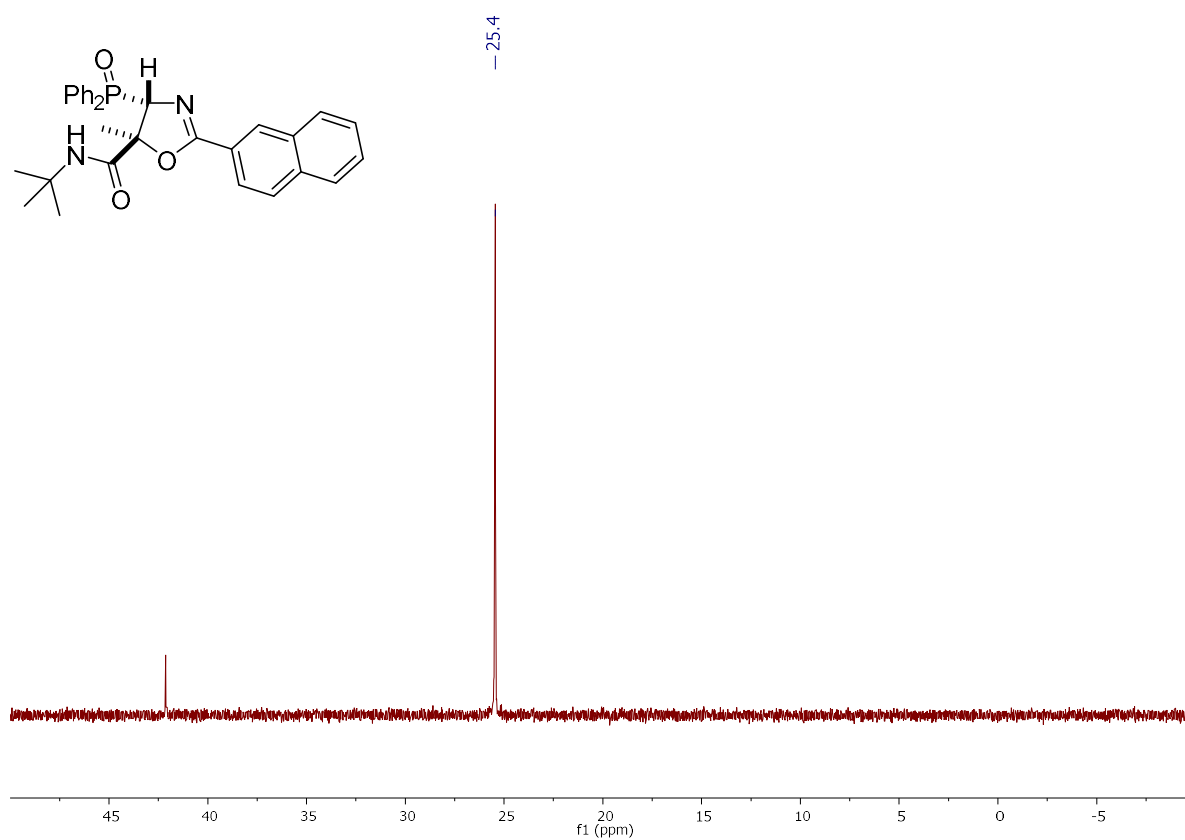

$^1\text{H}$  NMR (400 MHz,  $\text{CDCl}_3$ ) of Oxazole Derivative **7e**

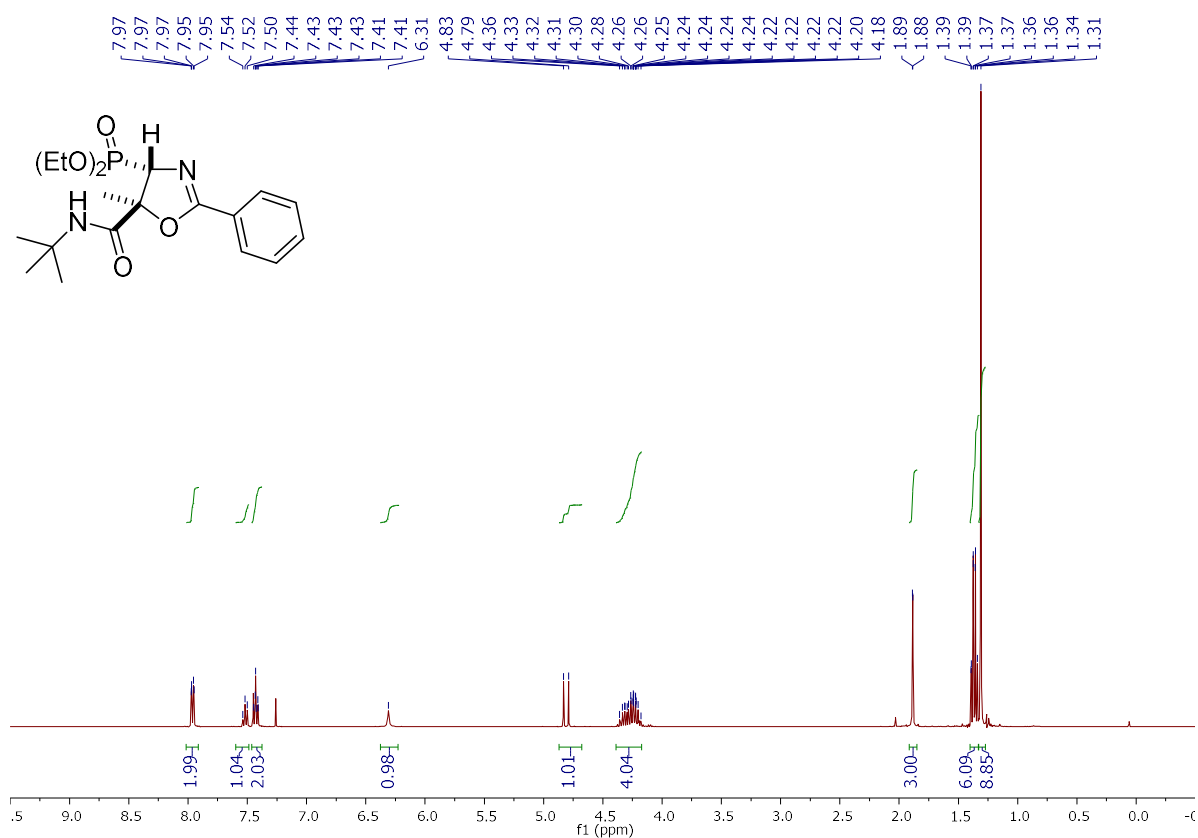

$^{13}\text{C}$  { $^1\text{H}$ } NMR (100 MHz,  $\text{CDCl}_3$ ) of Oxazole Derivative **7e**

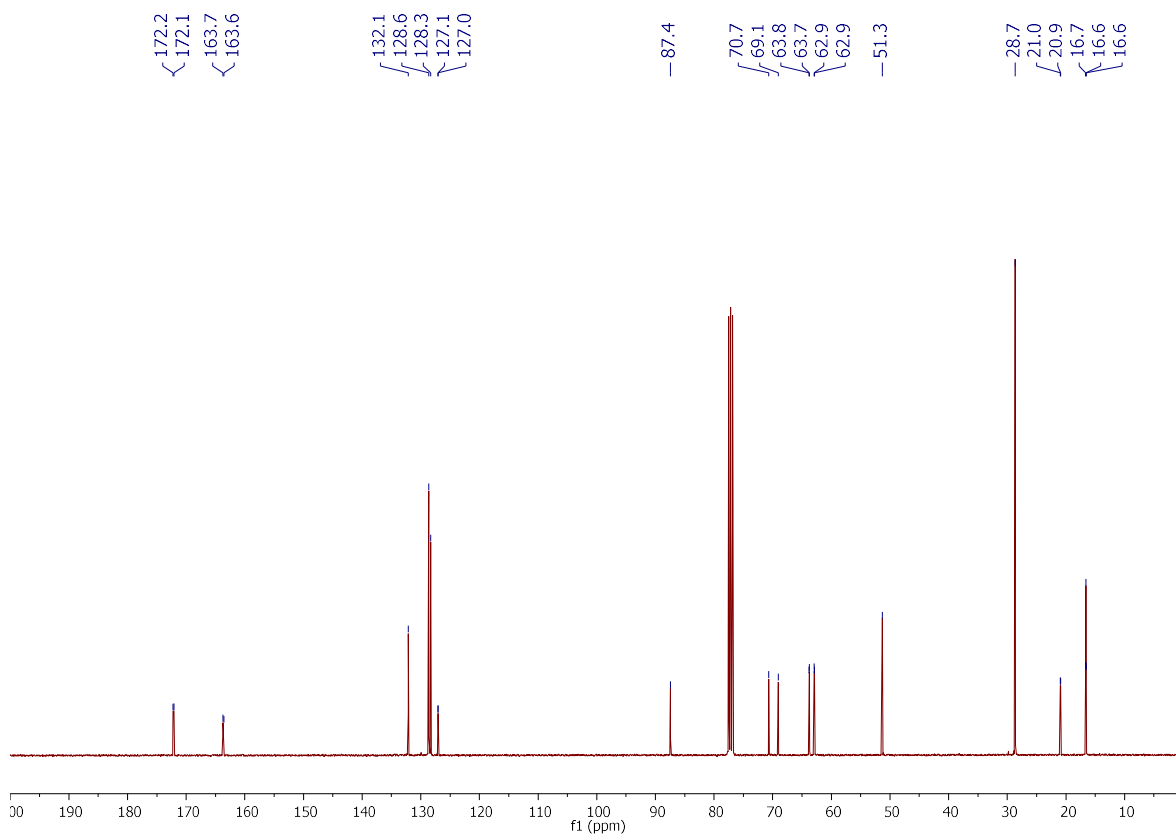



$^{31}\text{P}$  (160 MHz,  $\text{CDCl}_3$ ) of Oxazole Derivative **7e**

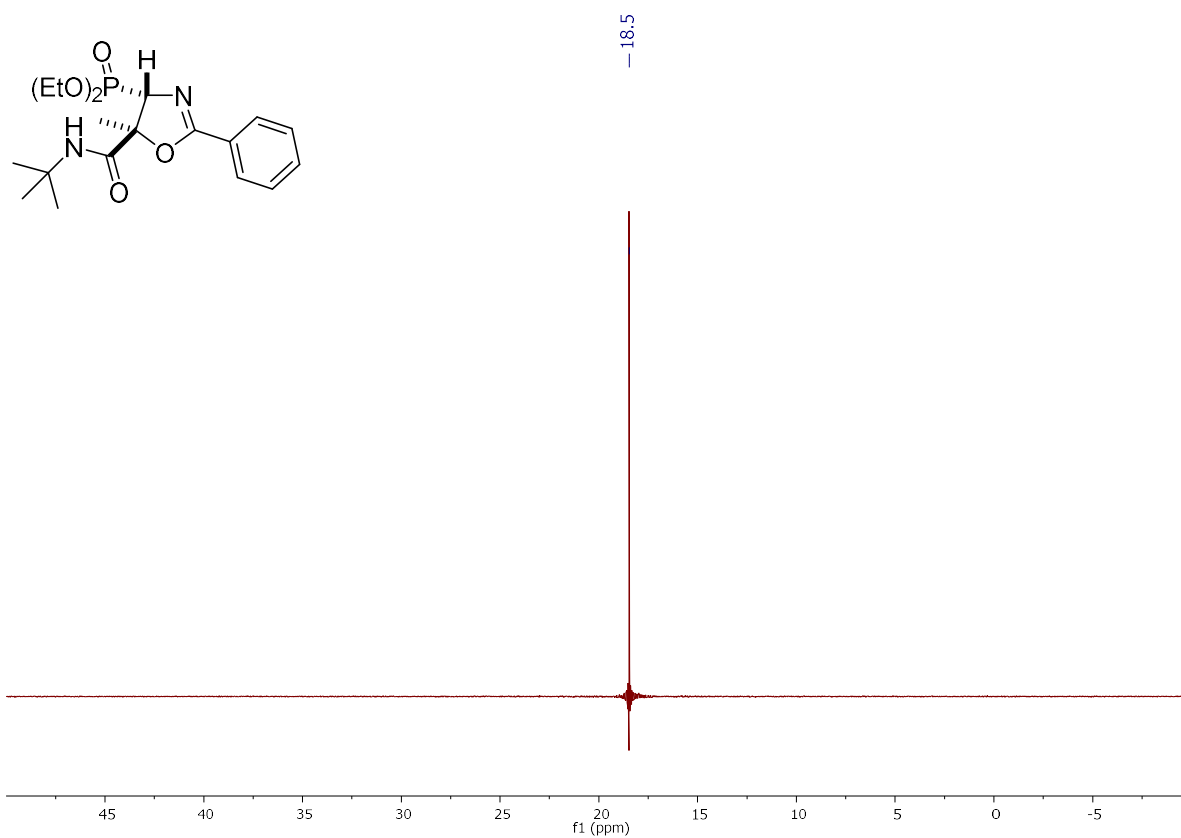

$^1\text{H}$  NMR (400 MHz,  $\text{CDCl}_3$ ) of Oxazole Derivative **7f**

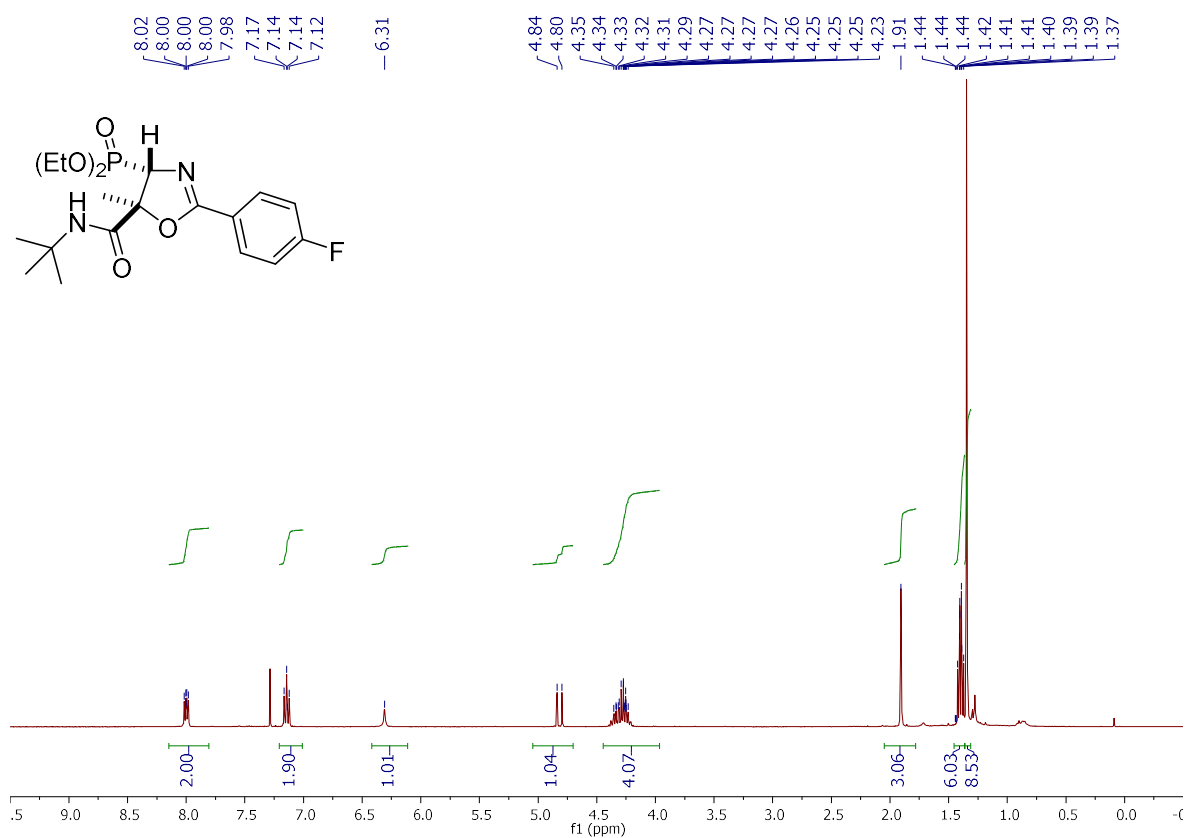

$^{13}\text{C}$   $\{^1\text{H}\}$  NMR (100 MHz,  $\text{CDCl}_3$ ) of Oxazole Derivative **7f**

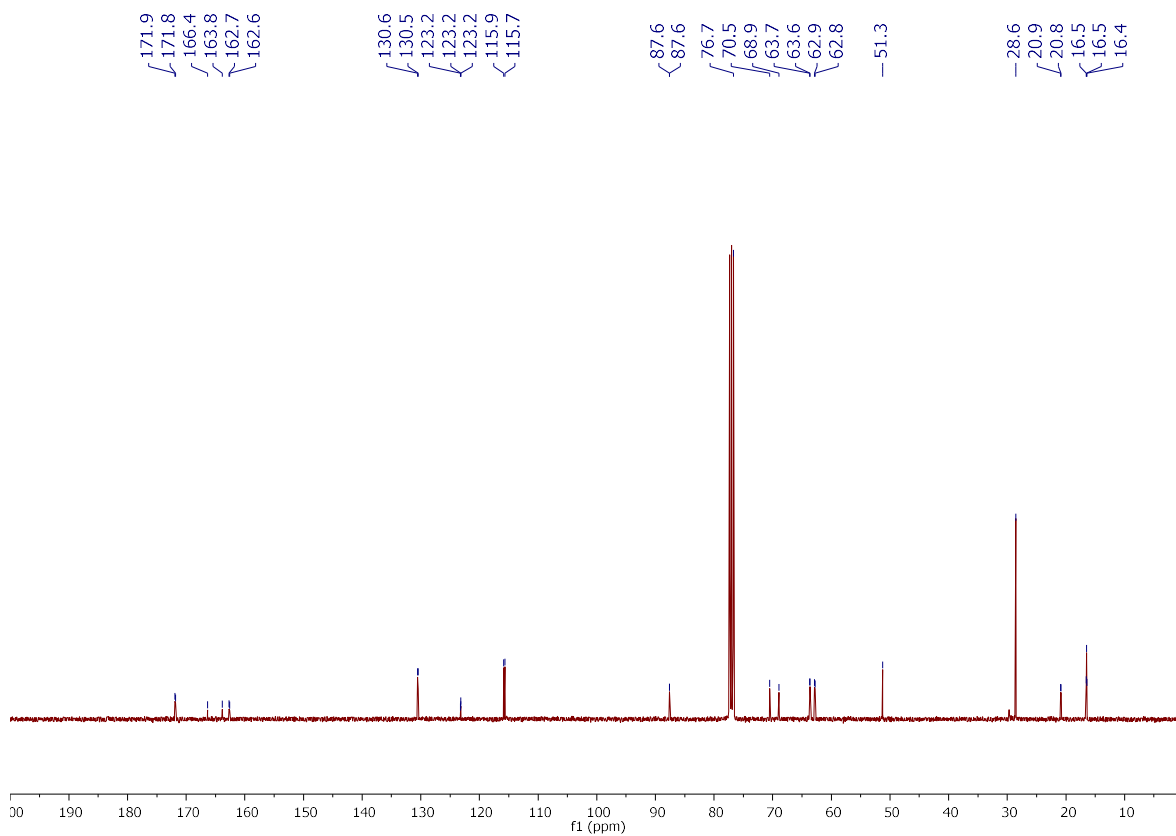

$^{31}\text{P}$  (160 MHz,  $\text{CDCl}_3$ ) of Oxazole Derivative **7f**

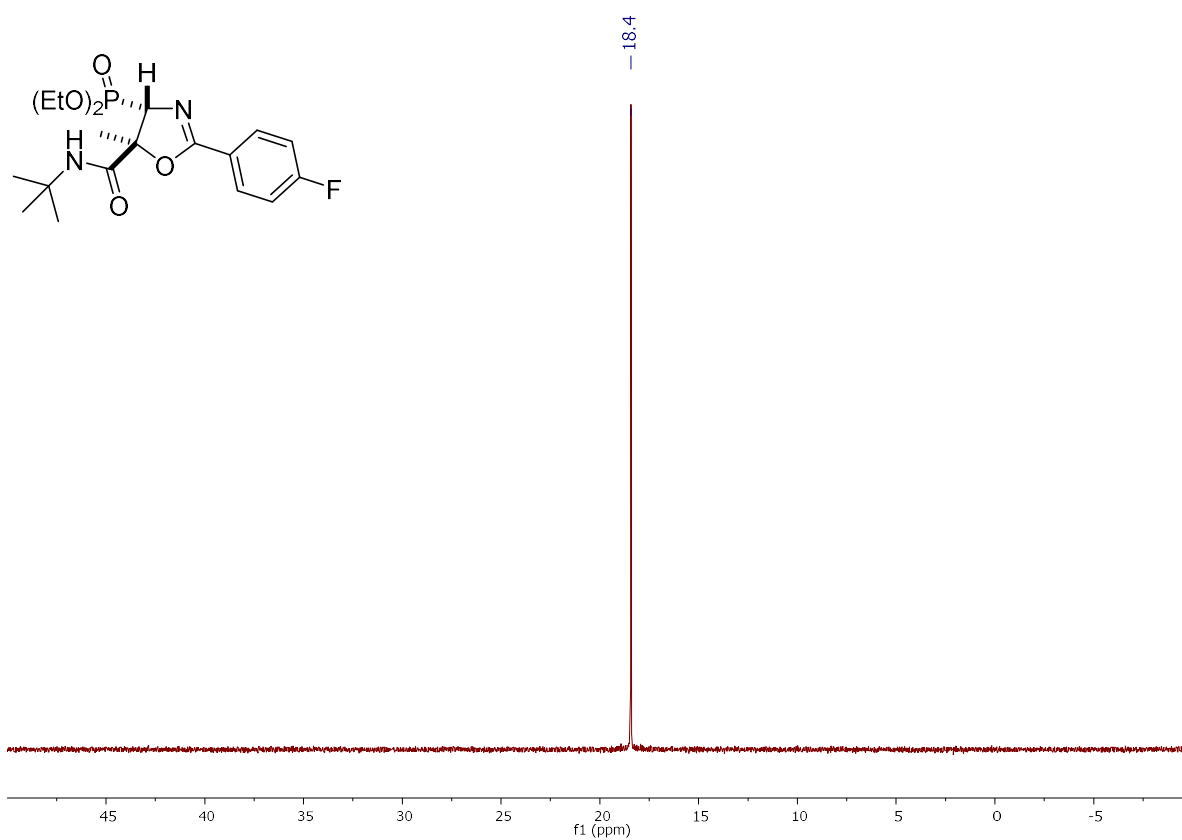

$^{19}\text{F}$  (376 MHz,  $\text{CDCl}_3$ ) of Oxazole Derivative **7f**

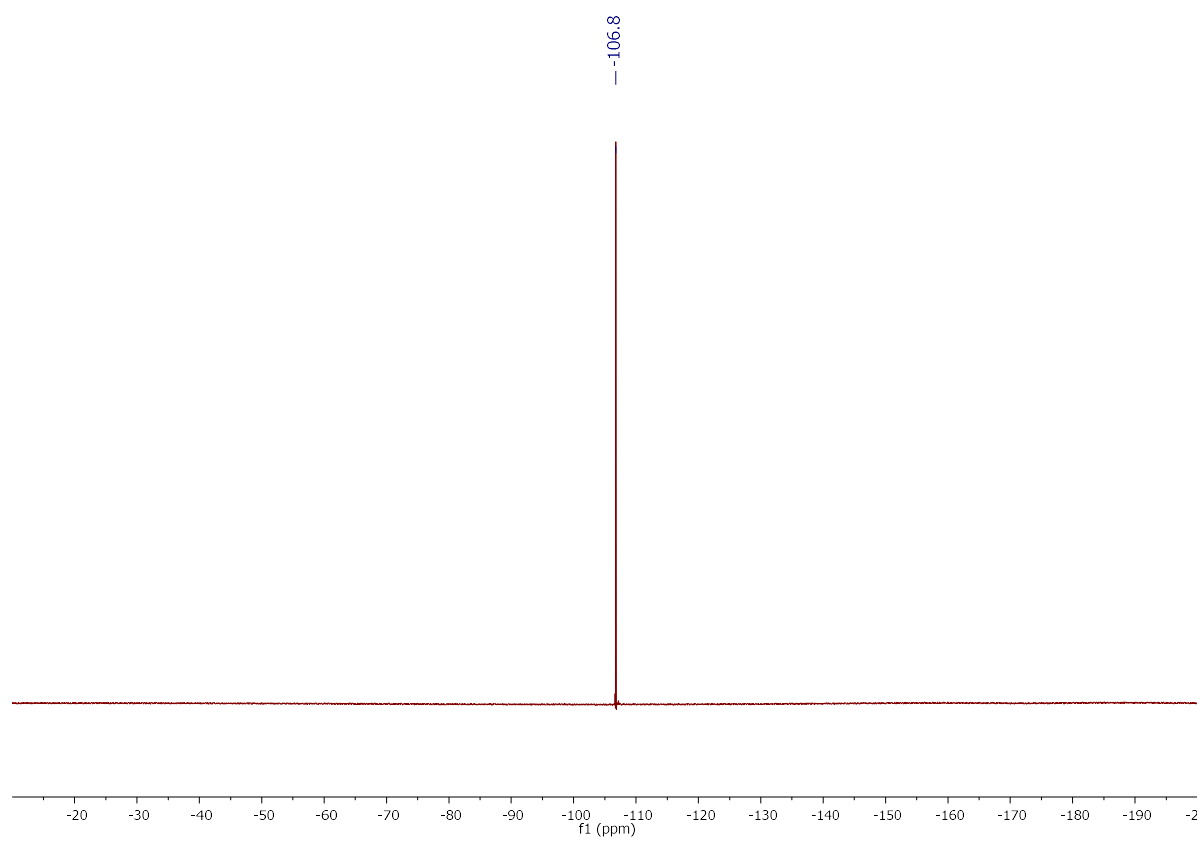

## 2. ORTEP view and X-ray crystallographic statistics for compounds **4i** and **7a**

*N*-Acylaziridine Phosphine Oxide **4i**

(CCDC deposition number 2304039)

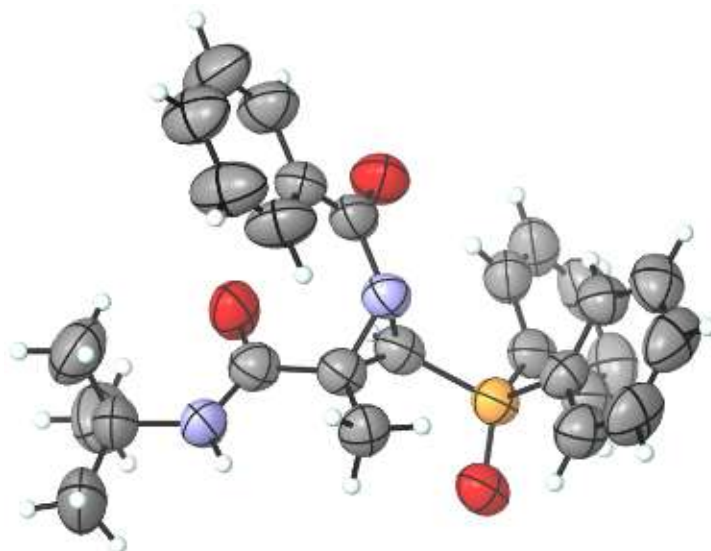

**Figure S1.** ORTEP diagram of compound **4i** with thermal displacement parameters drawn at 50% probability.

Single crystals of  $C_{27}H_{29}N_2O_3P$  [**4i**] were obtained. A suitable crystal was selected and mounted on a SuperNova, Dual, Cu at home/near, HyPix diffractometer. The crystal was kept at 170.01(10) K during data collection. Using Olex2,<sup>1</sup> the structure was solved with the ShelXS<sup>2</sup> structure solution program using Intrinsic Phasing and refined with the ShelXL<sup>3</sup> refinement package using Least Squares minimization.

**Table S1.** Crystal data and structure refinement for **4i**.

|                                                |                                                                 |
|------------------------------------------------|-----------------------------------------------------------------|
| Empirical formula                              | C <sub>27</sub> H <sub>29</sub> N <sub>2</sub> O <sub>3</sub> P |
| Formula weight                                 | 460.49                                                          |
| Temperature/K                                  | 170.01(10)                                                      |
| Crystal system                                 | monoclinic                                                      |
| Space group                                    | Pc                                                              |
| a/Å                                            | 14.3797(5)                                                      |
| b/Å                                            | 18.5342(9)                                                      |
| c/Å                                            | 9.2763(3)                                                       |
| $\alpha/^\circ$                                | 90.0                                                            |
| $\beta/^\circ$                                 | 99.780(3)                                                       |
| $\gamma/^\circ$                                | 90.0                                                            |
| Volume/Å <sup>3</sup>                          | 2436.35(17)                                                     |
| Z                                              | 4                                                               |
| $\rho_{\text{calc}}/\text{cm}^3$               | 1.255                                                           |
| $\mu/\text{mm}^{-1}$                           | 1.247                                                           |
| F(000)                                         | 976.0                                                           |
| Crystal size/mm <sup>3</sup>                   | 0.255 × 0.133 × 0.118                                           |
| Radiation                                      | CuK $\alpha$ ( $\lambda$ = 1.54184)                             |
| 2 $\Theta$ range for data collection/ $^\circ$ | 6.238 to 138                                                    |
| Index ranges                                   | -17 ≤ h ≤ 17, -22 ≤ k ≤ 20, -11 ≤ l ≤ 11                        |
| Reflections collected                          | 43034                                                           |
| Independent reflections                        | 8983 [ $R_{\text{int}}$ = 0.1481, $R_{\text{sigma}}$ = 0.0972]  |
| Data/restraints/parameters                     | 8983/14/603                                                     |
| Goodness-of-fit on F <sup>2</sup>              | 1.032                                                           |
| Final R indexes [ $I \geq 2\sigma(I)$ ]        | $R_1$ = 0.0819, $wR_2$ = 0.2127                                 |
| Final R indexes [all data]                     | $R_1$ = 0.1062, $wR_2$ = 0.2367                                 |
| Largest diff. peak/hole / e Å <sup>-3</sup>    | 0.51/-0.43                                                      |
| Flack parameter                                | 0.04(4)                                                         |
| Bijvoet Pairs Covarage                         | 98%                                                             |
| Hooft y                                        | 0.02(3)                                                         |
| P3 false                                       | ≤10 <sup>-99</sup>                                              |

Oxazole Derivative **7a**

(CCDC deposition number 2304041)

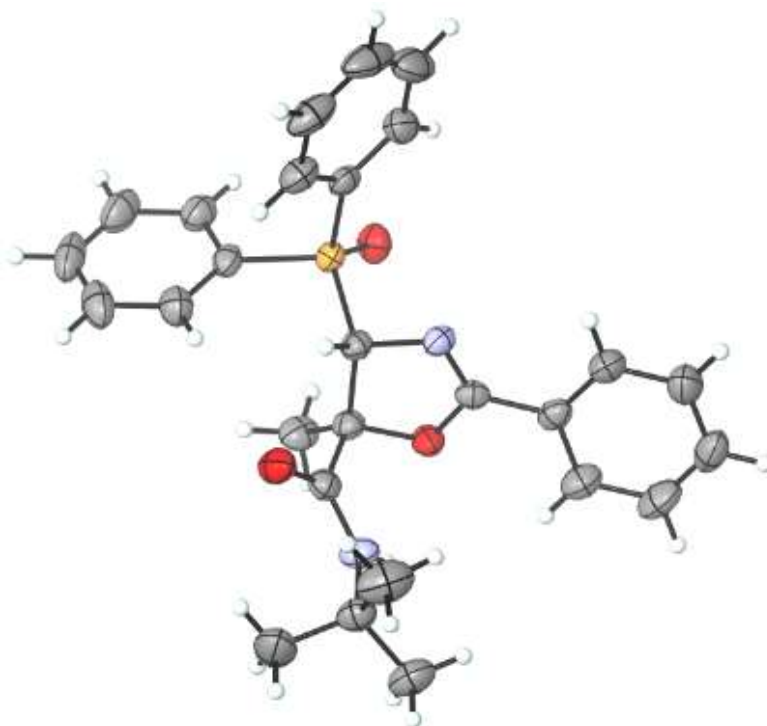

**Figure S2.** ORTEP diagram of compound **7a** with thermal displacement parameters drawn at 50% probability.

Single crystals of  $C_{27}H_{29}N_2O_3P$  [**7a**] were obtained. A suitable crystal was selected and mounted on a SuperNova, Dual, Cu at home/near, HyPix diffractometer. The crystal was kept at 170.01(10) K during data collection. Using Olex2,<sup>1</sup> the structure was solved with the ShelXS<sup>2</sup> structure solution program using Intrinsic Phasing and refined with the ShelXL<sup>3</sup> refinement package using Least Squares minimization.

**Table S2.** Crystal data and structure refinement for **7a**.

|                                                |                                                                 |
|------------------------------------------------|-----------------------------------------------------------------|
| Empirical formula                              | C <sub>27</sub> H <sub>29</sub> N <sub>2</sub> O <sub>3</sub> P |
| Formula weight                                 | 460.49                                                          |
| Temperature/K                                  | 170.00(10)                                                      |
| Crystal system                                 | monoclinic                                                      |
| Space group                                    | P21/n                                                           |
| a/Å                                            | 12.87200(8)                                                     |
| b/Å                                            | 10.12924(7)                                                     |
| c/Å                                            | 18.65780(11)                                                    |
| $\alpha/^\circ$                                | 90.0                                                            |
| $\beta/^\circ$                                 | 90.2466(5)                                                      |
| $\gamma/^\circ$                                | 90.0                                                            |
| Volume/Å <sup>3</sup>                          | 2432.65(3)                                                      |
| Z                                              | 4                                                               |
| $\rho_{\text{calc}}/\text{cm}^3$               | 1.257                                                           |
| $\mu/\text{mm}^{-1}$                           | 1.247                                                           |
| F(000)                                         | 976.0                                                           |
| Crystal size/mm <sup>3</sup>                   | 0.559 × 0.26 × 0.126                                            |
| Radiation                                      | CuK $\alpha$ ( $\lambda$ = 1.54184)                             |
| 2 $\Theta$ range for data collection/ $^\circ$ | 8.328 to 137.96                                                 |
| Index ranges                                   | -15 ≤ h ≤ 15, -12 ≤ k ≤ 12, -22 ≤ l ≤ 22                        |
| Reflections collected                          | 44390                                                           |
| Independent reflections                        | 4528 [ $R_{\text{int}}$ = 0.0611, $R_{\text{sigma}}$ = 0.0264]  |
| Data/restraints/parameters                     | 4528/0/302                                                      |
| Goodness-of-fit on F <sup>2</sup>              | 1.044                                                           |
| Final R indexes [ $I \geq 2\sigma(I)$ ]        | $R_1$ = 0.0342, $wR_2$ = 0.0901                                 |
| Final R indexes [all data]                     | $R_1$ = 0.0356, $wR_2$ = 0.0914                                 |
| Largest diff. peak/hole / e Å <sup>-3</sup>    | 0.27/-0.43                                                      |

### 3. References

- 
- <sup>1</sup> Dolomanov, O.V.; Bourhis, L.J.; Gildea, R.J.; Howard, J.A.K.; Puschmann, H. *J. Appl. Cryst.* **2009**, *42*, 339–341.
  - <sup>2</sup> Sheldrick, G. M. *Acta Cryst.* **2008**, *A64*, 112–122.
  - <sup>3</sup> Sheldrick, G. M. *Acta Cryst.* **2015**, *C71*, 3–8.
